# Supplementary material for: Full-Spectrum Neuronal Diversity and Stereotypy through Whole Brain Morphometry
Source: Research Square preprint supplement (doi:10.21203/rs.3.rs-3146034/v1), 2023-07-25
Supplement: Supplementary file 1 [file 7b7edee36c428b1bb1b56306.xlsx]

## Sheet: Sheet1
Animal ID	Image ID	Modality	Research lab	Resolution_XY (𝜇𝑚)	Resolution_Z (𝜇𝑚)	Dimension_X	Dimension_Y	Dimension_Z	Registered	Has auto-detected neurite	Genotype	Public downloadable link	BIL_path (whole brain)	technique	species	#soma identified	#auto-traced	#full-morphology	Morphometry on the BIL server	Has reference channel
210254	15257	morphology	U19 Zeng	NA	NA	21168	36400	10252	TRUE	TRUE	Sst-Cre	https://download.brainimagelibrary.org/df/75/df75626840c76c15/mouseID_210254-15257	/bil/data/df/75/df75626840c76c15/mouseID_210254-15257	fMOST	mouse	6308	1534	9		0
276772	17051	morphology	U19 Zeng	NA	NA	25792	32200	12930	TRUE	TRUE	Tnnt1-IRES2-CreERT2	NA	/bil/proj/u19zeng/fMOST_raw_data/mouseID_276772-17051	fMOST	mouse	305	108	0		1
271934	17052	morphology	U19 Zeng	NA	NA	34999	22900	11350	TRUE	TRUE	Pvalb-2A-CreERT2	NA	NA	fMOST	mouse	276	204	0		0
297974	17109	morphology	U19 Zeng	NA	NA	22793	35000	10553	TRUE	TRUE	Gnb4-IRES2-CreERT2	https://download.brainimagelibrary.org/biccn/zeng/luo/fMOST/mouseID_297974-17109/	/bil/data/biccn/zeng/luo/fmost/mouseID_297974-17109	fMOST	mouse	884	316	30	/bil/data/b7/93/b79396b82949005c/mouseID_297974-17109/	0
327010	17298	morphology	U19 Zeng	NA	NA	32266	54600	9988	TRUE	TRUE	Gnb4-IRES2-CreERT2	https://download.brainimagelibrary.org/ee/01/ee01a74d90e26226/mouseID_327010-17298/	/bil/data/ee/01/ee01a74d90e26226/mouseID_327010-17298/	fMOST	mouse	6825	0	0		0
314107	17300	morphology	U19 Zeng	0.2	1	37230	54600	9954	TRUE	TRUE	Plxnd1-CreER	https://download.brainimagelibrary.org/biccn/zeng/luo/fMOST/mouseID_314107-17300/	/bil/data/biccn/zeng/luo/fmost/mouseID_314107-17300	fMOST	mouse	2302	1726	6	/bil/data/b7/93/b79396b82949005c/mouseID_314107-17300/	0
326585	17301	morphology	U19 Zeng	NA	NA	33600	27188	9848	TRUE	TRUE	Slc6a4-CreERT2_EZ13	NA	NA	fMOST	mouse	1003	726	0		0
321237	17302	morphology	U19 Zeng	0.2	1	34412	54600	9847	TRUE	TRUE	Tnnt1-IRES2-CreERT2	https://download.brainimagelibrary.org/biccn/zeng/luo/fMOST/mouseID_321237-17302/	/bil/data/biccn/zeng/luo/fmost/mouseID_321237-17302	fMOST	mouse	652	468	91	/bil/data/b4/d4/b4d4211078a67217/17302/	0
326952	17304	morphology	U19 Zeng	NA	NA	42194	54600	10643	TRUE	TRUE	Tlx3-Cre_PL56	https://download.brainimagelibrary.org/94/77/94775d6a2ddab320/326952-17304/	/bil/data/94/77/94775d6a2ddab320/326952-17304/	fMOST	mouse	201	119	0		0
333710	17539	morphology	U19 Zeng	0.23	1	33601	23334	11143	TRUE	TRUE	Plxnd1-CreER	NA	NA	fMOST	mouse	650	349	0		1
342870	17541	morphology	U19 Zeng	NA	NA	39328	54600	11073	TRUE	TRUE	Sst-Cre	https://download.brainimagelibrary.org/ee/01/ee01a74d90e26226/mouseID_342870-17541/	/bil/data/ee/01/ee01a74d90e26226/mouseID_342870-17541/	fMOST	mouse	121	114	0		0
344548	17542	morphology	U19 Zeng	NA	NA	34748	54600	11333	TRUE	TRUE	Sst-Cre	https://download.brainimagelibrary.org/ee/01/ee01a74d90e26226/mouseID_344548-17542/	/bil/data/ee/01/ee01a74d90e26226/mouseID_344548-17542/	fMOST	mouse	3475	1128	0		0
325875	17543	morphology	U19 Zeng	0.35	1	34748	54600	11333	TRUE	TRUE	Tlx3-Cre_PL56	https://download.brainimagelibrary.org/df/75/df75626840c76c15/mouseID_325875-17543/	/bil/data/df/75/df75626840c76c15/mouseID_325875-17543/	fMOST	mouse	1552	621	17		1
332548	17544	morphology	U19 Zeng	NA	NA	39200	26351	11033	TRUE	TRUE	Tlx3-Cre_PL56	NA	NA	fMOST	mouse	41	0	0		0
321244	17545	morphology	U19 Zeng	0.2	1	35989	54600	10750	TRUE	TRUE	Tnnt1-IRES2-CreERT2	https://download.brainimagelibrary.org/biccn/zeng/luo/fMOST/mouseID_321244-17545/	/bil/data/biccn/zeng/luo/fmost/mouseID_321244-17545	fMOST	mouse	715	389	102	/bil/data/b4/d4/b4d4211078a67217/17545/	0
339951	17781	morphology	U19 Zeng	0.2	1	34722	54600	11021	TRUE	TRUE	Gnb4-IRES2-CreERT2	https://download.brainimagelibrary.org/biccn/zeng/luo/fMOST/mouseID_339951-17781/	/bil/data/biccn/zeng/luo/fmost/mouseID_339951-17781	fMOST	mouse	606	450	32	/bil/data/b4/d4/b4d4211078a67217/17781/	0
339952	17782	morphology	U19 Zeng	0.2	1	45000	28000	11786	TRUE	TRUE	Gnb4-IRES2-CreERT2	https://download.brainimagelibrary.org/biccn/zeng/luo/fMOST/mouseID_339952-17782/	/bil/data/biccn/zeng/luo/fmost/mouseID_339952-17782	fMOST	mouse	403	329	7	/bil/data/b4/d4/b4d4211078a67217/17782/	1
354569	17783	morphology	U19 Zeng	NA	NA	33600	23712	10817	TRUE	TRUE	Chrna2-Cre_OE25	NA	NA	fMOST	mouse	2083	721	0		0
351014	17785	morphology	U19 Zeng	NA	NA	35000	25245	10509	TRUE	TRUE	Grp-Cre_KH288	NA	NA	fMOST	mouse	452	239	0		0
351325	17786	morphology	U19 Zeng	NA	NA	36870	54600	11414	TRUE	TRUE	Plxnd1-CreER	https://download.brainimagelibrary.org/ee/01/ee01a74d90e26226/mouseID_351325-17786/	/bil/data/ee/01/ee01a74d90e26226/mouseID_351325-17786/	fMOST	mouse	1696	813	4		0
351327	17787	morphology	U19 Zeng	0.23	1	36400	24275	11478	TRUE	TRUE	Plxnd1-CreER	https://download.brainimagelibrary.org/f1/dc/f1dcaeb016197373/351327-17787	/bil/data/f1/dc/f1dcaeb016197373/351327-17787	fMOST	mouse	89	85	12		1
351331	17788	morphology	U19 Zeng	0.23	1	35000	27188	11120	TRUE	TRUE	Plxnd1-CreER	https://download.brainimagelibrary.org/f1/dc/f1dcaeb016197373/351331-17788	/bil/data/f1/dc/f1dcaeb016197373/351331-17788	fMOST	mouse	119	109	4		1
358361	18047	morphology	U19 Zeng	0.23	1	36000	28000	11561	TRUE	TRUE	Fezf2-CreER	https://download.brainimagelibrary.org/f1/dc/f1dcaeb016197373/358361-18047	/bil/data/f1/dc/f1dcaeb016197373/358361-18047	fMOST	mouse	115	106	8		1
360835	18049	morphology	U19 Zeng	0.23	1	35001	30001	11412	TRUE	TRUE	Slc6a4-CreERT2_EZ13	https://download.brainimagelibrary.org/df/75/df75626840c76c15/mouseID_360835-18049	/bil/data/df/75/df75626840c76c15/mouseID_360835-18049	fMOST	mouse	3	3	0		1
367667	18052	morphology	U19 Zeng	0.23	1	35000	28303	10923	TRUE	TRUE	Chat-IRES-Cre-neo	https://download.brainimagelibrary.org/df/75/df75626840c76c15/mouseID_367667-18052	/bil/data/df/75/df75626840c76c15/mouseID_367667-18052	fMOST	mouse	322	90	0		1
355458	18053	morphology	U19 Zeng	0.23	1	37000	25600	12500	TRUE	TRUE	Plxnd1-CreER	https://download.brainimagelibrary.org/f1/dc/f1dcaeb016197373/355458-18053	/bil/data/f1/dc/f1dcaeb016197373/355458-18053	fMOST	mouse	790	695	0		1
374707	18452	morphology	U19 Zeng	0.23	1	36400	23423	11028	TRUE	TRUE	Cux2-CreERT2	https://download.brainimagelibrary.org/df/75/df75626840c76c15/mouseID_374707-18452	/bil/data/df/75/df75626840c76c15/mouseID_374707-18452	fMOST	mouse	40	29	7		1
374712	18453	morphology	U19 Zeng	0.23	1	39200	24400	10538	TRUE	TRUE	Cux2-CreERT2	https://download.brainimagelibrary.org/ee/01/ee01a74d90e26226/mouseID_374712-18453/	/bil/data/ee/01/ee01a74d90e26226/mouseID_374712-18453/	fMOST	mouse	368	295	107		0
373367	18454	morphology	U19 Zeng	0.23	1	35000	26298	11041	TRUE	TRUE	Tnnt1-IRES2-CreERT2	https://download.brainimagelibrary.org/biccn/zeng/luo/fMOST/mouseID_373367-18454/	/bil/data/biccn/zeng/luo/fmost/mouseID_373367-18454	fMOST	mouse	2626	1581	226	/bil/data/b4/d4/b4d4211078a67217/18454/	1
373368	18455	morphology	U19 Zeng	0.23	1	40600	23376	10892	TRUE	TRUE	Tnnt1-IRES2-CreERT2	https://download.brainimagelibrary.org/biccn/zeng/luo/fMOST/mouseID_373368-18455/	/bil/data/biccn/zeng/luo/fmost/mouseID_373368-18455	fMOST	mouse	2968	1277	118	/bil/data/b4/d4/b4d4211078a67217/18455/	1
381484	18457	morphology	U19 Zeng	0.23	1	37800	24275	10955	TRUE	TRUE	Vipr2-IRES2-Cre-neo	https://download.brainimagelibrary.org/biccn/zeng/luo/fMOST/mouseID_381484-18457/	/bil/data/biccn/zeng/luo/fmost/mouseID_381484-18457	fMOST	mouse	311	220	139	/bil/data/b4/d4/b4d4211078a67217/18457/	1
381487	18458	morphology	U19 Zeng	0.23	1	40600	25376	10333	TRUE	TRUE	Vipr2-IRES2-Cre-neo	https://download.brainimagelibrary.org/df/75/df75626840c76c15/mouseID_381487-18458	/bil/data/df/75/df75626840c76c15/mouseID_381487-18458	fMOST	mouse	718	468	103		1
369739	18459	morphology	U19 Zeng	0.23	1	36400	22333	11264	TRUE	TRUE	Slc6a4-CreERT2_EZ13	https://download.brainimagelibrary.org/ee/01/ee01a74d90e26226/mouseID_369739-18459/	/bil/data/ee/01/ee01a74d90e26226/mouseID_369739-18459/	fMOST	mouse	131	52	0		0
374706	18461	morphology	U19 Zeng	0.35	1	28000	17838	11117	TRUE	TRUE	Cux2-CreERT2	https://download.brainimagelibrary.org/df/75/df75626840c76c15/mouseID_374706-18461	/bil/data/df/75/df75626840c76c15/mouseID_374706-18461	fMOST	mouse	75	56	12		1
373641	18462	morphology	U19 Zeng	0.35	1	32200	27748	10578	TRUE	TRUE	Tnnt1-IRES2-CreERT2	https://download.brainimagelibrary.org/df/75/df75626840c76c15/mouseID_373641-18462	/bil/data/df/75/df75626840c76c15/mouseID_373641-18462	fMOST	mouse	428	192	48		1
383680	18463	morphology	U19 Zeng	0.35	1	32200	17478	10842	TRUE	TRUE	Tnnt1-IRES2-CreERT2	https://download.brainimagelibrary.org/df/75/df75626840c76c15/mouseID_383680-18463	/bil/data/df/75/df75626840c76c15/mouseID_383680-18463	fMOST	mouse	664	289	51		1
381488	18464	morphology	U19 Zeng	0.23	1	35000	26352	10431	TRUE	TRUE	Vipr2-IRES2-Cre-neo	https://download.brainimagelibrary.org/df/75/df75626840c76c15/mouseID_381488-18464	/bil/data/df/75/df75626840c76c15/mouseID_381488-18464	fMOST	mouse	248	221	65		1
383128	18465	morphology	U19 Zeng	0.23	1	36000	26000	10301	TRUE	TRUE	Vipr2-IRES2-Cre-neo	https://download.brainimagelibrary.org/df/75/df75626840c76c15/mouseID_383128-18465	/bil/data/df/75/df75626840c76c15/mouseID_383128-18465	fMOST	mouse	349	274	143		1
377387	18466	morphology	U19 Zeng	0.23	1	42000	24400	11235	TRUE	TRUE	Slc6a4-CreERT2_EZ13	https://download.brainimagelibrary.org/df/75/df75626840c76c15/mouseID_377387-18466	/bil/data/df/75/df75626840c76c15/mouseID_377387-18466	fMOST	mouse	258	114	0		1
376318	18467	morphology	U19 Zeng	NA	NA	35000	25324	11389	TRUE	TRUE	Esr2-IRES2-Cre	NA	NA	fMOST	mouse	508	371	3		0
18468	18468	morphology	U19 Zeng	NA	NA	37230	54600	11256	TRUE	TRUE	Fezf2-CreER	https://download.brainimagelibrary.org/df/75/df75626840c76c15/mouseID_375394-18468	/bil/data/df/75/df75626840c76c15/mouseID_375394-18468	fMOST	mouse	22	22	0		1
378667	18469	morphology	U19 Zeng	NA	NA	34412	54600	10359	TRUE	TRUE	Fezf2-CreER	https://download.brainimagelibrary.org/df/75/df75626840c76c15/mouseID_378667-18469	/bil/data/df/75/df75626840c76c15/mouseID_378667-18469	fMOST	mouse	337	246	3		1
378668	18470	morphology	U19 Zeng	NA	NA	31954	54600	10226	TRUE	TRUE	Fezf2-CreER	https://download.brainimagelibrary.org/df/75/df75626840c76c15/mouseID_378668-18470	/bil/data/df/75/df75626840c76c15/mouseID_378668-18470	fMOST	mouse	220	150	3		1
383469	18471	morphology	U19 Zeng	0.23	1	39200	24400	11004	TRUE	TRUE	Etv1-CreERT2+Pvalb-T2A-Dre	NA	/bil/proj/u19zeng/fMOST_raw_data/mouseID_383469-18471	fMOST	mouse	911	338	0		1
384994	18472	morphology	U19 Zeng	0.23	1	42000	25324	10714	TRUE	TRUE	Etv1-CreERT2+Pvalb-T2A-Dre	NA	/bil/proj/u19zeng/fMOST_raw_data/mouseID_384994-18472	fMOST	mouse	3099	253	0		1
NA	18671	morphology	U19 Zeng	NA	NA	28290	37541	5018	TRUE	FALSE	NA	NA	NA	fMOST	mouse	0	0	0		0
390044	18860	morphology	U19 Zeng	0.23	1	42000	25324	10952	TRUE	TRUE	Chat-IRES-Cre-neo	NA	/bil/proj/u19zeng/fMOST_raw_data/mouseID_390044-18860	fMOST	mouse	3320	487	0		0
390048	18861	morphology	U19 Zeng	0.23	1	42000	23376	10906	TRUE	TRUE	Chat-IRES-Cre-neo	NA	NA	fMOST	mouse	2068	507	0		0
399845	18862	morphology	U19 Zeng	0.35	1	28000	17910	10798	TRUE	TRUE	Chat-IRES-Cre-neo	NA	/bil/proj/u19zeng/fMOST_raw_data/mouseID_399845-18862	fMOST	mouse	842	217	0		1
382148	18864	morphology	U19 Zeng	0.23	1	27299	35001	10392	TRUE	TRUE	Cux2-CreERT2	NA	NA	fMOST	mouse	520	466	115	/bil/data/b7/93/b79396b82949005c/mouseID_382148-18864/	0
395869	18865	morphology	U19 Zeng	0.23	1	36401	24001	11625	TRUE	TRUE	Oxtr-T2A-Cre+Pvalb-T2A-FlpO	https://download.brainimagelibrary.org/2f/12/2f12b1a3901e4181/mouseID_395869-18865	/bil/data/2f/12/2f12b1a3901e4181/mouseID_395869-18865	fMOST	mouse	3697	1579	0		1
395870	18866	morphology	U19 Zeng	0.35	1	29400	19900	11374	TRUE	TRUE	Oxtr-T2A-Cre+Pvalb-T2A-FlpO	https://download.brainimagelibrary.org/biccn/zeng/luo/fMOST/mouseID_395870-18866/	/bil/proj/u19zeng/fMOST_raw_data/mouseID_395870-18866	fMOST	mouse	1456	775	4		1
394528	18867	morphology	U19 Zeng	0.23	1	40600	25376	11203	TRUE	TRUE	Pvalb-T2A-CreERT2	https://download.brainimagelibrary.org/df/75/df75626840c76c15/mouseID_394528-18867	/bil/data/df/75/df75626840c76c15/mouseID_394528-18867	fMOST	mouse	199	174	87		0
396476	18868	morphology	U19 Zeng	0.23	1	36401	24001	10995	TRUE	TRUE	Pvalb-T2A-CreERT2	NA	/bil/proj/u19zeng/fMOST_terafly/mouseID_396476-18868	fMOST	mouse	651	556	83	/bil/data/b7/93/b79396b82949005c/mouseID_396476-18868/	1
396477	18869	morphology	U19 Zeng	0.35	1	29400	16915	10923	TRUE	TRUE	Pvalb-T2A-CreERT2	https://download.brainimagelibrary.org/ee/01/ee01a74d90e26226/mouseID_396477-18869/	/bil/data/ee/01/ee01a74d90e26226/mouseID_396477-18869/	fMOST	mouse	208	191	118		0
387650	18871	morphology	U19 Zeng	0.23	1	27353	35001	10909	TRUE	FALSE	Th-Cre_FI172	NA	/bil/proj/u19zeng/fMOST_raw_data/mouseID_387650-18871.210524/	fMOST	mouse	0	0	0		1
391751	18872	morphology	U19 Zeng	0.35	1	26600	18449	10370	TRUE	TRUE	Th-Cre_FI172	https://download.brainimagelibrary.org/2f/12/2f12b1a3901e4181/mouseID_391751-18872	/bil/data/2f/12/2f12b1a3901e4181/mouseID_391751-18872	fMOST	mouse	3405	807	0		1
375891	182711	morphology	U19 Zeng	0.35	1	19830	30801	11092	TRUE	TRUE	iCreV	https://download.brainimagelibrary.org/2f/12/2f12b1a3901e4181/mouseID_375891-182711	/bil/data/2f/12/2f12b1a3901e4181/mouseID_375891-182711	fMOST	mouse	0	0	0		1
372164	182712	morphology	U19 Zeng	0.23	1	25326	39201	8595	TRUE	TRUE	Syn-CreERT2	https://download.brainimagelibrary.org/biccn/zeng/luo/fMOST/mouseID_372164-182712/	/bil/proj/u19zeng/fMOST_raw_data/mouseID_372164-182712	fMOST	mouse	1858	1736	3		1
404421	182720	morphology	U19 Zeng	0.23	1	34117	37801	10913	TRUE	TRUE	Dbh-Cre_KH212	https://download.brainimagelibrary.org/2b/da/2bdaf9e66a246844/mouseID_404421-182720/	/bil/data/2b/da/2bdaf9e66a246844/mouseID_404421-182720/	fMOST	mouse	0	0	0		1
417570	182721	morphology	U19 Zeng	0.35	1	25326	39201	8595	TRUE	TRUE	Dbh-Cre_KH212	https://download.brainimagelibrary.org/df/75/df75626840c76c15/mouseID_417570-182721	/bil/data/df/75/df75626840c76c15/mouseID_417570-182721	fMOST	mouse	1	1	0		1
417571	182722	morphology	U19 Zeng	0.23	1	25351	37801	10715	TRUE	TRUE	Dbh-Cre_KH212	https://download.brainimagelibrary.org/df/75/df75626840c76c15/mouseID_417571-182722	/bil/data/df/75/df75626840c76c15/mouseID_417571-182722	fMOST	mouse	757	352	0		1
405426	182724	morphology	U19 Zeng	0.35	1	25351	37801	10715	TRUE	TRUE	Fezf2-CreER	https://download.brainimagelibrary.org/df/75/df75626840c76c15/mouseID_405426-182724	/bil/data/df/75/df75626840c76c15/mouseID_405426-182724	fMOST	mouse	0	0	22		1
405429	182725	morphology	U19 Zeng	0.35	1	25351	37801	10715	TRUE	TRUE	Fezf2-CreER	https://download.brainimagelibrary.org/2b/da/2bdaf9e66a246844/mouseID_405429-182725/	/bil/data/2b/da/2bdaf9e66a246844/mouseID_405429-182725/	fMOST	mouse	0	0	15		1
408668	182726	morphology	U19 Zeng	0.23	1	24425	40601	10923	TRUE	TRUE	Nos1-CreERT2+Sst-IRES-FlpO	https://download.brainimagelibrary.org/2f/12/2f12b1a3901e4181/mouseID_408668-182726	/bil/data/2f/12/2f12b1a3901e4181/mouseID_408668-182726	fMOST	mouse	331	244	0		1
418245	182727	morphology	U19 Zeng	0.35	1	18839	30801	11148	TRUE	TRUE	Nos1-CreERT2+Sst-IRES-FlpO	https://download.brainimagelibrary.org/2b/da/2bdaf9e66a246844/mouseID_418245-182727/	/bil/data/2b/da/2bdaf9e66a246844/mouseID_418245-182727/	fMOST	mouse	0	0	0		1
404922	182737	morphology	U19 Zeng	0.35	1	18839	30801	11722	TRUE	TRUE	NA	NA	/bil/proj/u19zeng/fMOST_raw_data/mouseID_404922-182737	fMOST	mouse	0	0	0		1
435222	191797	morphology	U19 Zeng	0.35	1	26600	18449	10370	TRUE	TRUE	Chrna2-Cre_OE25+Sst-IRES-FlpO	https://download.brainimagelibrary.org/2f/12/2f12b1a3901e4181/mouseID_435222-191797	/bil/data/2f/12/2f12b1a3901e4181/mouseID_435222-191797	fMOST	mouse	20745	1439	0		1
439309	191798	morphology	U19 Zeng	0.35	1	26600	18449	10370	TRUE	TRUE	Chrna2-Cre_OE25+Sst-IRES-FlpO	https://download.brainimagelibrary.org/2f/12/2f12b1a3901e4181/mouseID_439309-191798	/bil/data/2f/12/2f12b1a3901e4181/mouseID_439309-191798	fMOST	mouse	16300	1428	0		1
439311	191799	morphology	U19 Zeng	0.35	1	23886	30801	11025	TRUE	TRUE	Chrna2-Cre_OE25+Sst-IRES-FlpO	https://download.brainimagelibrary.org/2f/12/2f12b1a3901e4181/mouseID_439311-191799	/bil/data/2f/12/2f12b1a3901e4181/mouseID_439311-191799	fMOST	mouse	31044	1446	0		1
420489	191801	morphology	U19 Zeng	0.35	1	23886	30801	11025	TRUE	TRUE	Cux2-CreERT2	https://download.brainimagelibrary.org/df/75/df75626840c76c15/mouseID_420489-191801	/bil/data/df/75/df75626840c76c15/mouseID_420489-191801	fMOST	mouse	0	0	5		1
423019	191803	morphology	U19 Zeng	0.35	1	23886	30801	11025	TRUE	TRUE	Cux2-CreERT2	https://download.brainimagelibrary.org/df/75/df75626840c76c15/mouseID_423019-191803	/bil/data/df/75/df75626840c76c15/mouseID_423019-191803	fMOST	mouse	0	0	1		1
431038	191804	morphology	U19 Zeng	0.35	1	23886	30801	11025	TRUE	TRUE	Dbh-Cre_KH212	https://download.brainimagelibrary.org/df/75/df75626840c76c15/mouseID_431038-191804	/bil/data/df/75/df75626840c76c15/mouseID_431038-191804	fMOST	mouse	52	21	0		1
439168	191807	morphology	U19 Zeng	0.35	1	23886	30801	11025	TRUE	TRUE	Fezf2-CreER	https://download.brainimagelibrary.org/df/75/df75626840c76c15/mouseID_439168-191807	/bil/data/df/75/df75626840c76c15/mouseID_439168-191807	fMOST	mouse	0	0	13		1
426124	191808	morphology	U19 Zeng	0.35	1	23886	30801	11025	TRUE	TRUE	Nxph4-T2A-CreERT2	https://download.brainimagelibrary.org/df/75/df75626840c76c15/mouseID_426124-191808	/bil/data/df/75/df75626840c76c15/mouseID_426124-191808	fMOST	mouse	53	46	0		1
427527	191809	morphology	U19 Zeng	0.35	1	17916	30801	11766	TRUE	TRUE	Pdyn-T2A-CreERT2+Sst-IRES-FlpO	https://download.brainimagelibrary.org/2f/12/2f12b1a3901e4181/mouseID_427527-191809	/bil/data/2f/12/2f12b1a3901e4181/mouseID_427527-191809	fMOST	mouse	0	0	0		1
438169	191810	morphology	U19 Zeng	0.35	1	19773	30801	11167	TRUE	TRUE	Pdyn-T2A-CreERT2+Sst-IRES-FlpO	https://download.brainimagelibrary.org/2f/12/2f12b1a3901e4181/mouseID_438169-191810	/bil/data/2f/12/2f12b1a3901e4181/mouseID_438169-191810	fMOST	mouse	0	0	0		1
442529	191811	morphology	U19 Zeng	0.35	1	19811	29401	10895	TRUE	TRUE	Pdyn-T2A-CreERT2+Sst-IRES-FlpO	https://download.brainimagelibrary.org/2f/12/2f12b1a3901e4181/mouseID_442529-191811	/bil/data/2f/12/2f12b1a3901e4181/mouseID_442529-191811	fMOST	mouse	0	0	0		1
380470	191812	morphology	U19 Zeng	0.35	1	23886	30801	11025	TRUE	TRUE	Plxnd1-CreER	https://download.brainimagelibrary.org/df/75/df75626840c76c15/mouseID_380470-191812	/bil/data/df/75/df75626840c76c15/mouseID_380470-191812	fMOST	mouse	0	0	32		1
380471	191813	morphology	U19 Zeng	0.35	1	23886	30801	11025	TRUE	TRUE	Plxnd1-CreER	https://download.brainimagelibrary.org/df/75/df75626840c76c15/mouseID_380471-191813	/bil/data/df/75/df75626840c76c15/mouseID_380471-191813	fMOST	mouse	837	472	0		1
362188	191815	morphology	U19 Zeng	0.35	1	19868	28001	10804	TRUE	TRUE	Sst-Cre	https://download.brainimagelibrary.org/df/75/df75626840c76c15/mouseID_362188-191815	/bil/data/df/75/df75626840c76c15/mouseID_362188-191815	fMOST	mouse	0	0	0		1
373187	191817	morphology	U19 Zeng	0.35	1	19906	29401	11428	TRUE	TRUE	Sst-Cre	https://download.brainimagelibrary.org/df/75/df75626840c76c15/mouseID_373187-191817	/bil/data/df/75/df75626840c76c15/mouseID_373187-191817	fMOST	mouse	286	0	0		1
453450	192333	morphology	U19 Zeng	0.35	1	23886	30801	11025	TRUE	TRUE	Calb2-CreERT2	https://download.brainimagelibrary.org/2f/12/2f12b1a3901e4181/mouseID_453450-192333	/bil/data/2f/12/2f12b1a3901e4181/mouseID_453450-192333	fMOST	mouse	463	102	0		1
453452	192334	morphology	U19 Zeng	0.35	1	23886	30801	11025	TRUE	TRUE	Calb2-CreERT2	https://download.brainimagelibrary.org/2f/12/2f12b1a3901e4181/mouseID_453452-192334	/bil/data/2f/12/2f12b1a3901e4181/mouseID_453452-192334	fMOST	mouse	487	256	0		1
454924	192335	morphology	U19 Zeng	0.35	1	19868	29401	11299	TRUE	TRUE	Calb2-CreERT2	https://download.brainimagelibrary.org/2f/12/2f12b1a3901e4181/mouseID_454924-192335	/bil/data/2f/12/2f12b1a3901e4181/mouseID_454924-192335	fMOST	mouse	0	0	0		1
452669	192337	morphology	U19 Zeng	0.23	1	25276	39201	11450	TRUE	TRUE	Nxph4-T2A-CreERT2	https://download.brainimagelibrary.org/2f/12/2f12b1a3901e4181/mouseID_452669-192337	/bil/data/2f/12/2f12b1a3901e4181/mouseID_452669-192337	fMOST	mouse	815	396	0		1
452670	192338	morphology	U19 Zeng	0.35	1	18911	30801	11370	TRUE	TRUE	Nxph4-T2A-CreERT2	https://download.brainimagelibrary.org/2f/12/2f12b1a3901e4181/mouseID_452670-192338	/bil/data/2f/12/2f12b1a3901e4181/mouseID_452670-192338	fMOST	mouse	0	0	0		1
452674	192339	morphology	U19 Zeng	0.35	1	19906	30801	10980	TRUE	TRUE	Nxph4-T2A-CreERT2	https://download.brainimagelibrary.org/2f/12/2f12b1a3901e4181/mouseID_452674-192339	/bil/data/2f/12/2f12b1a3901e4181/mouseID_452674-192339	fMOST	mouse	0	0	0		1
452676	192340	morphology	U19 Zeng	0.23	1	25326	39201	11117	TRUE	TRUE	Nxph4-T2A-CreERT2	https://download.brainimagelibrary.org/2f/12/2f12b1a3901e4181/mouseID_452676-192340	/bil/data/2f/12/2f12b1a3901e4181/mouseID_452676-192340	fMOST	mouse	0	0	0		1
463865	192341	morphology	U19 Zeng	0.35	1	25276	39201	11450	TRUE	TRUE	Nxph4-T2A-CreERT2	https://download.brainimagelibrary.org/ee/01/ee01a74d90e26226/mouseID_463865-192341/	/bil/data/ee/01/ee01a74d90e26226/mouseID_463865-192341/	fMOST	mouse	1641	118	0		0
454427	192342	morphology	U19 Zeng	0.35	1	17814	30801	11495	TRUE	TRUE	Plxnd1-CreER	https://download.brainimagelibrary.org/2f/12/2f12b1a3901e4181/mouseID_454426-192342	/bil/data/2f/12/2f12b1a3901e4181/mouseID_454426-192342	fMOST	mouse	0	0	0		1
454427	192343	morphology	U19 Zeng	0.35	1	25276	39201	11450	TRUE	TRUE	Plxnd1-CreER	https://download.brainimagelibrary.org/2f/12/2f12b1a3901e4181/mouseID_454427-192343	/bil/data/2f/12/2f12b1a3901e4181/mouseID_454427-192343	fMOST	mouse	17	14	0		1
459080	192344	morphology	U19 Zeng	0.35	1	19830	30801	11213	TRUE	FALSE	Plxnd1-CreER	https://download.brainimagelibrary.org/2f/12/2f12b1a3901e4181/mouseID_459080-192344	/bil/data/2f/12/2f12b1a3901e4181/mouseID_459080-192344	fMOST	mouse	22	0	0		1
436253	192346	morphology	U19 Zeng	0.35	1	25276	39201	11450	TRUE	TRUE	Tacr1-T2A-Cre+Sst-IRES-FlpO	NA	/bil/proj/u19zeng/fMOST_raw_data/mouseID_436253-192346	fMOST	mouse	10412	1243	0		1
444771	192348	morphology	U19 Zeng	0.35	1	25276	39201	11450	TRUE	TRUE	Tacr1-T2A-Cre+Sst-IRES-FlpO	https://download.brainimagelibrary.org/2f/12/2f12b1a3901e4181/mouseID_444771-192348	/bil/data/2f/12/2f12b1a3901e4181/mouseID_444771-192348	fMOST	mouse	11637	1205	0		1
446176	192349	morphology	U19 Zeng	0.35	1	25276	39201	11450	TRUE	TRUE	Tacr1-T2A-Cre+Sst-IRES-FlpO	NA	/bil/proj/u19zeng/fMOST_raw_data/mouseID_446176-192349	fMOST	mouse	16324	1165	0		1
463964	194060	morphology	U19 Zeng	0.35	1	25276	39201	11450	TRUE	TRUE	Calb2-CreERT2	https://download.brainimagelibrary.org/2f/12/2f12b1a3901e4181/mouseID_463964-194060	/bil/data/2f/12/2f12b1a3901e4181/mouseID_463964-194060	fMOST	mouse	364	255	0		1
463967	194061	morphology	U19 Zeng	0.35	1	25276	39201	11450	TRUE	TRUE	Calb2-CreERT2	https://download.brainimagelibrary.org/2f/12/2f12b1a3901e4181/mouseID_463967-194061	/bil/data/2f/12/2f12b1a3901e4181/mouseID_463967-194061	fMOST	mouse	2	2	0		1
463970	194062	morphology	U19 Zeng	0.35	1	25276	39201	11450	TRUE	TRUE	Calb2-CreERT2	https://download.brainimagelibrary.org/2f/12/2f12b1a3901e4181/mouseID_463970-194062	/bil/data/2f/12/2f12b1a3901e4181/mouseID_463970-194062	fMOST	mouse	266	150	0		1
483393	194063	morphology	U19 Zeng	0.35	1	25276	39201	11450	TRUE	TRUE	Calb2-CreERT2	https://download.brainimagelibrary.org/2f/12/2f12b1a3901e4181/mouseID_483393-194063	/bil/data/2f/12/2f12b1a3901e4181/mouseID_483393-194063	fMOST	mouse	478	231	0		1
483394	194064	morphology	U19 Zeng	0.35	1	25276	39201	11450	TRUE	TRUE	Calb2-CreERT2	https://download.brainimagelibrary.org/2f/12/2f12b1a3901e4181/mouseID_483394-194064	/bil/data/2f/12/2f12b1a3901e4181/mouseID_483394-194064	fMOST	mouse	88	61	0		1
458629	194065	morphology	U19 Zeng	0.35	1	19773	30801	11374	TRUE	TRUE	Cux2-CreERT2	https://download.brainimagelibrary.org/2f/12/2f12b1a3901e4181/mouseID_458629-194065	/bil/data/2f/12/2f12b1a3901e4181/mouseID_458629-194065	fMOST	mouse	0	0	0		1
462923	194066	morphology	U19 Zeng	0.35	1	19773	30801	11374	TRUE	TRUE	Cux2-CreERT2	https://download.brainimagelibrary.org/2f/12/2f12b1a3901e4181/mouseID_462923-194066	/bil/data/2f/12/2f12b1a3901e4181/mouseID_462923-194066	fMOST	mouse	0	0	0		1
467364	194067	morphology	U19 Zeng	0.35	1	18821	30801	11418	TRUE	TRUE	Cux2-CreERT2	https://download.brainimagelibrary.org/2f/12/2f12b1a3901e4181/mouseID_467364-194067	/bil/data/2f/12/2f12b1a3901e4181/mouseID_467364-194067	fMOST	mouse	0	0	0		1
467369	194068	morphology	U19 Zeng	0.35	1	20761	30801	10957	TRUE	TRUE	Cux2-CreERT2	https://download.brainimagelibrary.org/2f/12/2f12b1a3901e4181/mouseID_467369-194068	/bil/data/2f/12/2f12b1a3901e4181/mouseID_467369-194068	fMOST	mouse	0	0	0		1
455391	194069	morphology	U19 Zeng	0.35	1	25276	39201	11450	TRUE	TRUE	Fezf2-CreER	https://download.brainimagelibrary.org/2f/12/2f12b1a3901e4181/mouseID_455391-194069	/bil/data/2f/12/2f12b1a3901e4181/mouseID_455391-194069	fMOST	mouse	204	113	0		1
456380	194071	morphology	U19 Zeng	0.35	1	25276	39201	11450	TRUE	TRUE	Fezf2-CreER	https://download.brainimagelibrary.org/biccn/zeng/luo/fMOST/mouseID_456380-194071/	/bil/proj/u19zeng/fMOST_raw_data/mouseID_456380-194071	fMOST	mouse	0	0	0		1
464408	194072	morphology	U19 Zeng	0.35	1	25276	39201	11450	TRUE	TRUE	Fezf2-CreER	https://download.brainimagelibrary.org/biccn/zeng/luo/fMOST/mouseID_464408-194072/	/bil/proj/u19zeng/fMOST_raw_data/mouseID_464408-194072	fMOST	mouse	112	102	0		1
472055	194073	morphology	U19 Zeng	0.35	1	25276	39201	11450	TRUE	TRUE	Plxnd1-CreER	https://download.brainimagelibrary.org/2f/12/2f12b1a3901e4181/mouseID_472055-194073	/bil/data/2f/12/2f12b1a3901e4181/mouseID_472055-194073	fMOST	mouse	6	6	0		1
472056	194074	morphology	U19 Zeng	0.35	1	18839	30801	11302	TRUE	TRUE	Plxnd1-CreER	https://download.brainimagelibrary.org/2f/12/2f12b1a3901e4181/mouseID_472056-194074	/bil/data/2f/12/2f12b1a3901e4181/mouseID_472056-194074	fMOST	mouse	0	0	0		1
476570	194075	morphology	U19 Zeng	0.35	1	25276	39201	11450	TRUE	TRUE	Plxnd1-CreER	https://download.brainimagelibrary.org/2f/12/2f12b1a3901e4181/mouseID_476570-194075	/bil/data/2f/12/2f12b1a3901e4181/mouseID_476570-194075	fMOST	mouse	13	11	0		1
476574	194076	morphology	U19 Zeng	0.35	1	25276	39201	11450	TRUE	TRUE	Plxnd1-CreER	https://download.brainimagelibrary.org/biccn/zeng/luo/fMOST/mouseID_476574-194076/	/bil/proj/u19zeng/fMOST_raw_data/mouseID_476574-194076	fMOST	mouse	3	3	0		1
481967	194077	morphology	U19 Zeng	0.35	1	19906	32201	11407	TRUE	TRUE	Plxnd1-CreER	https://download.brainimagelibrary.org/2f/12/2f12b1a3901e4181/mouseID_481967-194077	/bil/data/2f/12/2f12b1a3901e4181/mouseID_481967-194077	fMOST	mouse	14	0	0		1
481969	194078	morphology	U19 Zeng	0.35	1	23886	30801	11005	TRUE	TRUE	Plxnd1-CreER	https://download.brainimagelibrary.org/2f/12/2f12b1a3901e4181/mouseID_481969-194078	/bil/data/2f/12/2f12b1a3901e4181/mouseID_481969-194078	fMOST	mouse	48	0	0		1
481971	194079	morphology	U19 Zeng	0.35	1	18913	30800	11189	TRUE	TRUE	Plxnd1-CreER	https://download.brainimagelibrary.org/2f/12/2f12b1a3901e4181/mouseID_481971-194079	/bil/data/2f/12/2f12b1a3901e4181/mouseID_481971-194079	fMOST	mouse	0	0	0		1
471329	194080	morphology	U19 Zeng	0.35	1	25276	39201	11450	TRUE	TRUE	Pvalb-T2A-CreERT2	https://download.brainimagelibrary.org/2f/12/2f12b1a3901e4181/mouseID_471329-194080	/bil/data/2f/12/2f12b1a3901e4181/mouseID_471329-194080	fMOST	mouse	355	318	0		1
472610	194081	morphology	U19 Zeng	0.35	1	25276	39201	11450	TRUE	TRUE	Pvalb-T2A-CreERT2	https://download.brainimagelibrary.org/2f/12/2f12b1a3901e4181/mouseID_472610-194081	/bil/data/2f/12/2f12b1a3901e4181/mouseID_472610-194081	fMOST	mouse	292	221	0		1
482503	194083	morphology	U19 Zeng	0.35	1	19811	30801	11767	TRUE	TRUE	Tle4-CreER	https://download.brainimagelibrary.org/2f/12/2f12b1a3901e4181/mouseID_482503-194083	/bil/data/2f/12/2f12b1a3901e4181/mouseID_482503-194083	fMOST	mouse	0	0	0		1
500139	196463	morphology	U19 Zeng	NA	NA	26769	30800	12435	TRUE	TRUE	Vipr2-IRES2-Cre-neo	NA	NA	fMOST	mouse	1123	471	0		0
500140	196464	morphology	U19 Zeng	NA	NA	26743	33600	11004	TRUE	TRUE	Vipr2-IRES2-Cre-neo	NA	NA	fMOST	mouse	912	205	0		0
500141	196465	morphology	U19 Zeng	NA	NA	24931	32200	12962	TRUE	TRUE	Vipr2-IRES2-Cre-neo	NA	NA	fMOST	mouse	1276	189	0		0
500142	196466	morphology	U19 Zeng	NA	NA	25878	32200	12959	TRUE	TRUE	Vipr2-IRES2-Cre-neo	NA	NA	fMOST	mouse	806	218	0		0
494229	196468	morphology	U19 Zeng	0.35	1	25878	32200	12959	TRUE	TRUE	Calb2-CreERT2	https://download.brainimagelibrary.org/2f/12/2f12b1a3901e4181/mouseID_494229-196468	/bil/data/2f/12/2f12b1a3901e4181/mouseID_494229-196468	fMOST	mouse	137	90	0		1
497523	196469	morphology	U19 Zeng	0.35	1	25878	32200	12959	TRUE	TRUE	Calb2-CreERT2	https://download.brainimagelibrary.org/2f/12/2f12b1a3901e4181/mouseID_497523-196469	/bil/data/2f/12/2f12b1a3901e4181/mouseID_497523-196469	fMOST	mouse	568	176	0		1
491992	196470	morphology	U19 Zeng	0.35	1	25878	32200	12959	TRUE	TRUE	Pdyn-T2A-CreERT2	https://download.brainimagelibrary.org/2f/12/2f12b1a3901e4181/mouseID_491992-196470	/bil/data/2f/12/2f12b1a3901e4181/mouseID_491992-196470	fMOST	mouse	72	61	0		1
491993	196471	morphology	U19 Zeng	0.35	1	25878	32200	12959	TRUE	TRUE	Pdyn-T2A-CreERT2	https://download.brainimagelibrary.org/2f/12/2f12b1a3901e4181/mouseID_491993-196471	/bil/data/2f/12/2f12b1a3901e4181/mouseID_491993-196471	fMOST	mouse	98	69	0		1
491994	196472	morphology	U19 Zeng	0.35	1	25878	32200	12959	TRUE	TRUE	Pdyn-T2A-CreERT2	https://download.brainimagelibrary.org/2f/12/2f12b1a3901e4181/mouseID_491994-196472	/bil/data/2f/12/2f12b1a3901e4181/mouseID_491994-196472	fMOST	mouse	60	56	0		1
493297	196474	morphology	U19 Zeng	0.35	1	25878	32200	12959	TRUE	TRUE	Pdyn-T2A-CreERT2	https://download.brainimagelibrary.org/2f/12/2f12b1a3901e4181/mouseID_493297-196474	/bil/data/2f/12/2f12b1a3901e4181/mouseID_493297-196474	fMOST	mouse	228	170	0		1
486476	196476	morphology	U19 Zeng	0.35	1	25878	32200	12959	TRUE	TRUE	Tle4-CreER	https://download.brainimagelibrary.org/2f/12/2f12b1a3901e4181/mouseID_486476-196476	/bil/data/2f/12/2f12b1a3901e4181/mouseID_486476-196476	fMOST	mouse	303	268	0		1
486477	196477	morphology	U19 Zeng	0.35	1	25878	32200	12959	TRUE	TRUE	Tle4-CreER	https://download.brainimagelibrary.org/2f/12/2f12b1a3901e4181/mouseID_486477-196477	/bil/data/2f/12/2f12b1a3901e4181/mouseID_486477-196477	fMOST	mouse	115	112	0		1
486478	196478	morphology	U19 Zeng	0.35	1	25878	32200	12959	TRUE	TRUE	Tle4-CreER	https://download.brainimagelibrary.org/df/75/df75626840c76c15/mouseID_486478-196478	/bil/data/df/75/df75626840c76c15/mouseID_486478-196478	fMOST	mouse	249	210	0		1
365716	196487	morphology	U19 Zeng	0.35	1	23888	30800	10491	TRUE	TRUE	Sst-Cre	https://download.brainimagelibrary.org/2f/12/2f12b1a3901e4181/mouseID_365716-196487	/bil/data/2f/12/2f12b1a3901e4181/mouseID_365716-196487	fMOST	mouse	0	0	0		1
502170	201582	morphology	U19 Zeng	0.35	1	36859	43400	11992	TRUE	TRUE	Pvalb-T2A-CreERT2	https://download.brainimagelibrary.org/b3/ae/b3ae4e9b258e8542/mouseID_502170-201582	/bil/data/b3/ae/b3ae4e9b258e8542/mouseID_502170-201582	fMOST	mouse	1520	1043	0		1
498844	201584	morphology	U19 Zeng	0.35	1	23842	32200	12182	TRUE	TRUE	Pvalb-T2A-CreERT2	https://download.brainimagelibrary.org/2f/12/2f12b1a3901e4181/mouseID_498844-201584	/bil/data/2f/12/2f12b1a3901e4181/mouseID_498844-201584	fMOST	mouse	9525	480	0		1
498845	201585	morphology	U19 Zeng	0.35	1	31941	43400	12102	TRUE	TRUE	Pvalb-T2A-CreERT2	https://download.brainimagelibrary.org/2f/12/2f12b1a3901e4181/mouseID_498845-201585	/bil/data/2f/12/2f12b1a3901e4181/mouseID_498845-201585	fMOST	mouse	12002	165	0		1
498846	201586	morphology	U19 Zeng	0.35	1	35688	46200	11611	TRUE	TRUE	Pvalb-T2A-CreERT2	https://download.brainimagelibrary.org/2f/12/2f12b1a3901e4181/mouseID_498846-201586	/bil/data/2f/12/2f12b1a3901e4181/mouseID_498846-201586	fMOST	mouse	4766	323	0		1
504320	201587	morphology	U19 Zeng	0.35	1	21793	30800	11149	TRUE	TRUE	Calb2-CreERT2	https://download.brainimagelibrary.org/2f/12/2f12b1a3901e4181/mouseID_504320-201587	/bil/data/2f/12/2f12b1a3901e4181/mouseID_504320-201587	fMOST	mouse	0	0	0		1
504321	201588	morphology	U19 Zeng	0.35	1	35688	46200	11611	TRUE	TRUE	Calb2-CreERT2	https://download.brainimagelibrary.org/2f/12/2f12b1a3901e4181/mouseID_504321-201588	/bil/data/2f/12/2f12b1a3901e4181/mouseID_504321-201588	fMOST	mouse	113	43	0		1
507599	201589	morphology	U19 Zeng	0.35	1	35688	46200	11611	TRUE	TRUE	Calb2-CreERT2	https://download.brainimagelibrary.org/2f/12/2f12b1a3901e4181/mouseID_507599-201589	/bil/data/2f/12/2f12b1a3901e4181/mouseID_507599-201589	fMOST	mouse	10575	323	0		1
507603	201590	morphology	U19 Zeng	0.35	1	35688	46200	11611	TRUE	TRUE	Calb2-CreERT2	https://download.brainimagelibrary.org/2f/12/2f12b1a3901e4181/mouseID_507603-201590	/bil/data/2f/12/2f12b1a3901e4181/mouseID_507603-201590	fMOST	mouse	2922	628	0		1
501053	201591	morphology	U19 Zeng	0.35	1	18859	30800	10367	TRUE	TRUE	Chat-IRES-Cre	https://download.brainimagelibrary.org/biccn/zeng/luo/fMOST/mouseID_501053-201591/	/bil/proj/u19zeng/fMOST_raw_data/mouseID_501053-201591	fMOST	mouse	0	0	0		1
504501	201593	morphology	U19 Zeng	0.35	1	18841	29400	10408	TRUE	TRUE	Npr3-IRES2-CreERT2-neo	https://download.brainimagelibrary.org/biccn/zeng/luo/fMOST/mouseID_504501-201593/	/bil/proj/u19zeng/fMOST_raw_data/mouseID_504501-201593	fMOST	mouse	0	0	0		1
512882	201594	morphology	U19 Zeng	0.35	1	29887	43400	10470	TRUE	TRUE	Npr3-IRES2-CreERT2-neo	https://download.brainimagelibrary.org/2f/12/2f12b1a3901e4181/mouseID_512882-201594	/bil/data/2f/12/2f12b1a3901e4181/mouseID_512882-201594	fMOST	mouse	0	0	0		1
504322	201595	morphology	U19 Zeng	0.325	1	30474	26005	11736	TRUE	TRUE	Calb2-CreERT2	https://download.brainimagelibrary.org/2f/12/2f12b1a3901e4181/mouseID_504322-201595	/bil/data/2f/12/2f12b1a3901e4181/mouseID_504322-201595	fMOST	mouse	455	143	0		1
504324	201596	morphology	U19 Zeng	0.325	1	30600	22005	10852	TRUE	TRUE	Calb2-CreERT2	https://download.brainimagelibrary.org/2f/12/2f12b1a3901e4181/mouseID_504324-201596	/bil/data/2f/12/2f12b1a3901e4181/mouseID_504324-201596	fMOST	mouse	0	0	0		1
507602	201598	morphology	U19 Zeng	0.325	1	28536	22005	11438	TRUE	TRUE	Calb2-CreERT2	https://download.brainimagelibrary.org/2f/12/2f12b1a3901e4181/mouseID_507602-201598	/bil/data/2f/12/2f12b1a3901e4181/mouseID_507602-201598	fMOST	mouse	95	75	0		1
504499	201602	morphology	U19 Zeng	0.325	1	28432	23005	11200	TRUE	TRUE	Npr3-IRES2-CreERT2-neo	https://download.brainimagelibrary.org/biccn/zeng/luo/fMOST/mouseID_504499-201602/	/bil/proj/u19zeng/fMOST_raw_data/mouseID_504499-201602	fMOST	mouse	0	0	0		1
474594	201603	morphology	U19 Zeng	0.325	1	28601	23005	10630	TRUE	TRUE	Nxph4-T2A-CreERT2	https://download.brainimagelibrary.org/2f/12/2f12b1a3901e4181/mouseID_474594-201603	/bil/data/2f/12/2f12b1a3901e4181/mouseID_474594-201603	fMOST	mouse	0	0	0		1
511266	201604	morphology	U19 Zeng	0.325	1	28523	22018	10416	TRUE	TRUE	Pdyn-T2A-CreERT2	https://download.brainimagelibrary.org/2f/12/2f12b1a3901e4181/mouseID_511266-201604	/bil/data/2f/12/2f12b1a3901e4181/mouseID_511266-201604	fMOST	mouse	3	3	0		1
512894	201605	morphology	U19 Zeng	0.325	1	28627	25005	10558	TRUE	TRUE	Pdyn-T2A-CreERT2	https://download.brainimagelibrary.org/2f/12/2f12b1a3901e4181/mouseID_512894-201605	/bil/data/2f/12/2f12b1a3901e4181/mouseID_512894-201605	fMOST	mouse	7	5	0		1
512897	201606	morphology	U19 Zeng	0.325	1	30698	29005	10908	TRUE	TRUE	Pdyn-T2A-CreERT2	https://download.brainimagelibrary.org/2f/12/2f12b1a3901e4181/mouseID_512897-201606	/bil/data/2f/12/2f12b1a3901e4181/mouseID_512897-201606	fMOST	mouse	59	48	0		1
576273	211540	morphology	U19 Zeng	0.35	1	26847	22400	12040	TRUE	TRUE	Vip-IRES-FlpO	https://download.brainimagelibrary.org/biccn/zeng/luo/fMOST/mouseID_576273-211540/	/bil/proj/u19zeng/fMOST_raw_data/mouseID_576273-211540	fMOST	mouse	0	0	0		1
577267	211541	morphology	U19 Zeng	0.35	1	25953	21000	11204	TRUE	TRUE	Gpr139-IRES2-FlpO-WPRE	NA	/bil/proj/u19zeng/fMOST_raw_data/mouseID_577267-211541	fMOST	mouse	481	334	0		1
574889	211544	morphology	U19 Zeng	0.35	1	26951	22400	11605	TRUE	TRUE	Gal-Cre_KI87	https://download.brainimagelibrary.org/biccn/zeng/luo/fMOST/mouseID_574889-211544/	/bil/proj/u19zeng/fMOST_raw_data/mouseID_574889-211544	fMOST	mouse	0	0	0		1
578438	211546	morphology	U19 Zeng	0.35	1	26899	23800	11076	TRUE	TRUE	Th-Cre_FI172	https://download.brainimagelibrary.org/biccn/zeng/luo/fMOST/mouseID_578438-211546/	/bil/proj/u19zeng/fMOST_raw_data/mouseID_578438-211546	fMOST	mouse	0	0	0		1
574872	211547	morphology	U19 Zeng	0.35	1	26951	25200	11589	TRUE	TRUE	Calb2-IRES-Cre	https://download.brainimagelibrary.org/biccn/zeng/luo/fMOST/mouseID_574872-211547/	/bil/proj/u19zeng/fMOST_raw_data/mouseID_574872-211547	fMOST	mouse	0	0	0		1
577639	211549	morphology	U19 Zeng	0.35	1	25778	21000	11685	TRUE	TRUE	Ctxn3-IRES2-FlpO	https://download.brainimagelibrary.org/biccn/zeng/luo/fMOST/mouseID_577639-211549/	/bil/proj/u19zeng/fMOST_raw_data/mouseID_577639-211549	fMOST	mouse	0	0	0		1
581039	211550	morphology	U19 Zeng	0.35	1	26691	23800	11505	TRUE	TRUE	Chrna6-IRES2-FlpO-WPRE-neo	NA	/bil/proj/u19zeng/fMOST_raw_data/mouseID_581039-211550	fMOST	mouse	0	0	0		1
494230	211775	morphology	U19 Zeng	NA	NA	26847	22400	11567	TRUE	TRUE	Calb2-CreERT2	https://download.brainimagelibrary.org/2f/12/2f12b1a3901e4181/mouseID_494230-211775	/bil/data/2f/12/2f12b1a3901e4181/mouseID_494230-211775	fMOST	mouse	0	0	0		0
497520	211776	morphology	U19 Zeng	NA	NA	26743	21000	10515	TRUE	TRUE	Calb2-CreERT2	https://download.brainimagelibrary.org/2f/12/2f12b1a3901e4181/mouseID_497520-211776	/bil/data/2f/12/2f12b1a3901e4181/mouseID_497520-211776	fMOST	mouse	0	0	0		0
510498	211777	morphology	U19 Zeng	NA	NA	26899	19600	11448	TRUE	TRUE	Calb2-CreERT2	https://download.brainimagelibrary.org/2f/12/2f12b1a3901e4181/mouseID_510498-211777	/bil/data/2f/12/2f12b1a3901e4181/mouseID_510498-211777	fMOST	mouse	0	0	0		0
510502	211778	morphology	U19 Zeng	NA	NA	26769	21000	10762	TRUE	TRUE	Calb2-CreERT2	https://download.brainimagelibrary.org/2f/12/2f12b1a3901e4181/mouseID_510502-211778	/bil/data/2f/12/2f12b1a3901e4181/mouseID_510502-211778	fMOST	mouse	0	0	0		0
445243	211780	morphology	U19 Zeng	NA	NA	26899	22400	10976	TRUE	TRUE	Cux2-CreERT2	https://download.brainimagelibrary.org/2f/12/2f12b1a3901e4181/mouseID_445243-211780	/bil/data/2f/12/2f12b1a3901e4181/mouseID_445243-211780	fMOST	mouse	0	0	0		0
467362	211782	morphology	U19 Zeng	NA	NA	26769	21000	10968	TRUE	TRUE	Cux2-CreERT2	https://download.brainimagelibrary.org/2f/12/2f12b1a3901e4181/mouseID_467362-211782	/bil/data/2f/12/2f12b1a3901e4181/mouseID_467362-211782	fMOST	mouse	0	0	0		0
451347	211783	morphology	U19 Zeng	0.35	1	25753	22400	10710	TRUE	TRUE	Fezf2-CreER	https://download.brainimagelibrary.org/biccn/zeng/luo/fMOST/mouseID_451347-211783/	/bil/proj/u19zeng/fMOST_raw_data/mouseID_451347-211783/	fMOST	mouse	0	0	0		1
451348	211784	morphology	U19 Zeng	0.35	1	25928	21000	10743	TRUE	TRUE	Fezf2-CreER	https://download.brainimagelibrary.org/biccn/zeng/luo/fMOST/mouseID_451348-211784/	/bil/proj/u19zeng/fMOST_terafly/mouseID_451348-211784	fMOST	mouse	0	0	0		1
497458	211786	morphology	U19 Zeng	NA	NA	25753	21000	10360	TRUE	TRUE	Plxnd1-CreER	https://download.brainimagelibrary.org/2f/12/2f12b1a3901e4181/mouseID_497458-211786	/bil/data/2f/12/2f12b1a3901e4181/mouseID_497458-211786	fMOST	mouse	0	0	0		0
497462	211787	morphology	U19 Zeng	NA	NA	26769	22400	10499	TRUE	TRUE	Plxnd1-CreER	https://download.brainimagelibrary.org/2f/12/2f12b1a3901e4181/mouseID_497462-211787	/bil/data/2f/12/2f12b1a3901e4181/mouseID_497462-211787	fMOST	mouse	0	0	0		0
578169	211791	morphology	U19 Zeng	0.35	1	24787	22400	11107	TRUE	TRUE	Ctgf-T2A-dgCre	https://download.brainimagelibrary.org/biccn/zeng/luo/fMOST/mouseID_578169-211791/	/bil/proj/u19zeng/fMOST_raw_data/mouseID_578169-211791	fMOST	mouse	0	0	0		1
581040	211796	morphology	U19 Zeng	0.35	1	26769	22400	11399	TRUE	TRUE	Chrna6-IRES2-FlpO-WPRE-neo	NA	/bil/proj/u19zeng/fMOST_raw_data/mouseID_581040-211796	fMOST	mouse	0	0	0		1
588379	211798	morphology	U19 Zeng	0.35	1	26717	21000	11288	TRUE	TRUE	Th-Cre_FI172	https://download.brainimagelibrary.org/biccn/zeng/luo/fMOST/mouseID_588379-211798/	/bil/proj/u19zeng/fMOST_raw_data/mouseID_588379-211798	fMOST	mouse	0	0	0		1
588923	211799	morphology	U19 Zeng	NA	NA	27706	22400	11168	TRUE	TRUE	Chat-IRES-Cre	https://download.brainimagelibrary.org/2f/12/2f12b1a3901e4181/mouseID_588923-211799	/bil/data/2f/12/2f12b1a3901e4181/mouseID_588923-211799	fMOST	mouse	0	0	0		0
588922	211800	morphology	U19 Zeng	NA	NA	26821	23800	11406	TRUE	TRUE	Chat-IRES-Cre	https://download.brainimagelibrary.org/2f/12/2f12b1a3901e4181/mouseID_588922-211800	/bil/data/2f/12/2f12b1a3901e4181/mouseID_588922-211800	fMOST	mouse	0	0	0		0
586838	211801	morphology	U19 Zeng	NA	NA	27760	21000	11711	TRUE	TRUE	Chat-IRES-Cre-neo	https://download.brainimagelibrary.org/2f/12/2f12b1a3901e4181/mouseID_586838-211801	/bil/data/2f/12/2f12b1a3901e4181/mouseID_586838-211801	fMOST	mouse	0	0	0		0
586840	211802	morphology	U19 Zeng	NA	NA	25878	21000	10957	TRUE	TRUE	Chat-IRES-Cre-neo	https://download.brainimagelibrary.org/2f/12/2f12b1a3901e4181/mouseID_586840-211802	/bil/data/2f/12/2f12b1a3901e4181/mouseID_586840-211802	fMOST	mouse	0	0	0		0
538071	211803	morphology	U19 Zeng	0.35	1	25778	21000	10687	TRUE	TRUE	Npr3-IRES2-CreERT2-neo	https://download.brainimagelibrary.org/biccn/zeng/luo/fMOST/mouseID_538071-211803/	/bil/proj/u19zeng/fMOST_raw_data/mouseID_538071-211803	fMOST	mouse	0	0	0		1
538073	211804	morphology	U19 Zeng	0.35	1	26743	19600	10874	TRUE	TRUE	Npr3-IRES2-CreERT2-neo	https://download.brainimagelibrary.org/biccn/zeng/luo/fMOST/mouseID_538073-211804/	/bil/proj/u19zeng/fMOST_raw_data/mouseID_538073-211804	fMOST	mouse	0	0	0		1
538074	211805	morphology	U19 Zeng	0.35	1	27841	22400	10386	TRUE	TRUE	Npr3-IRES2-CreERT2-neo	https://download.brainimagelibrary.org/biccn/zeng/luo/fMOST/mouseID_538074-211805/	/bil/proj/u19zeng/fMOST_raw_data/mouseID_538074-211805	fMOST	mouse	0	0	0		1
522151	211806	morphology	U19 Zeng	NA	NA	25803	21000	11175	TRUE	TRUE	Pdyn-T2A-CreERT2	https://download.brainimagelibrary.org/2f/12/2f12b1a3901e4181/mouseID_522151-211806	/bil/data/2f/12/2f12b1a3901e4181/mouseID_522151-211806	fMOST	mouse	0	0	0		0
522152	211807	morphology	U19 Zeng	NA	NA	25753	21000	10809	TRUE	TRUE	Pdyn-T2A-CreERT2	https://download.brainimagelibrary.org/2f/12/2f12b1a3901e4181/mouseID_522152-211807	/bil/data/2f/12/2f12b1a3901e4181/mouseID_522152-211807	fMOST	mouse	0	0	0		0
236174	16124	morphology	U19 Zeng	0.23	1	23814	36400	12061	TRUE	TRUE	Gnb4-IRES2-CreERT2	https://download.brainimagelibrary.org/7f/53/7f537a62e521a26a/mouseID_236174/	/bil/data/7f/53/7f537a62e521a26a/mouseID_236174/	fMOST	mouse	149	91	43		0
19022514	190892	cell morphology	U19 Huang	0.35	1	44801	26377	12013	TRUE	TRUE	Fezf2-creER+LSL-flp	https://download.brainimagelibrary.org/00/9c/009c1e6fcc03ebac/mouseID_19022514-190892/	/bil/data/00/9c/009c1e6fcc03ebac/mouseID_19022514-190892/	fMOST	mouse	0	0	0		0
19022512	190902	cell morphology	U19 Huang	0.35	1	30801	18785	11873	TRUE	TRUE	Fezf2-creER+LSL-flp	https://download.brainimagelibrary.org/00/9c/009c1e6fcc03ebac/mouseID_19022512-190902/	/bil/data/00/9c/009c1e6fcc03ebac/mouseID_19022512-190902/	fMOST	mouse	0	0	0		0
19022513	190891	cell morphology	U19 Huang	0.35	1	32201	20901	12518	TRUE	TRUE	Fezf2-creER+LSL-flp	https://download.brainimagelibrary.org/00/9c/009c1e6fcc03ebac/mouseID_19022513-190891/	/bil/data/00/9c/009c1e6fcc03ebac/mouseID_19022513-190891/	fMOST	mouse	0	0	0		0
19022515	190900	cell morphology	U19 Huang	0.35	1	32201	19773	12549	TRUE	TRUE	Fezf2-creER+LSL-flp	https://download.brainimagelibrary.org/00/9c/009c1e6fcc03ebac/mouseID_19022515-190900/	/bil/data/00/9c/009c1e6fcc03ebac/mouseID_19022515-190900/	fMOST	mouse	0	0	0		0
19030611	191196	cell morphology	U19 Huang	0.35	1	29401	18839	11792	TRUE	TRUE	Fezf2-creER+LSL-flp	https://download.brainimagelibrary.org/00/9c/009c1e6fcc03ebac/mouseID_19030611-191196/	/bil/data/00/9c/009c1e6fcc03ebac/mouseID_19030611-191196/	fMOST	mouse	0	0	0		0
19081503	193374	cell morphology	U19 Huang	0.35	1	29401	17797	12063	TRUE	TRUE	Fezf2-2A-CreER*LSL-Flpo	https://download.brainimagelibrary.org/3a/c1/3ac1bdc022d0da78/193374-5	/bil/data/3a/c1/3ac1bdc022d0da78/193374-5	fMOST	mouse	0	0	0		0
19081510	193381	cell morphology	U19 Huang	0.35	1	33801	21896	11703	TRUE	TRUE	Fezf2-creER+LSL-flp	https://download.brainimagelibrary.org/00/9c/009c1e6fcc03ebac/mouseID_019081510-193381/	/bil/data/00/9c/009c1e6fcc03ebac/mouseID_019081510-193381/	fMOST	mouse	0	0	0		0
19081513	193385	cell morphology	U19 Huang	0.35	1	26601	20821	11075	TRUE	TRUE	Fezf2-creER+LSL-flp	https://download.brainimagelibrary.org/00/9c/009c1e6fcc03ebac/mouseID_019081513-193385/	/bil/data/00/9c/009c1e6fcc03ebac/mouseID_019081513-193385/	fMOST	mouse	0	0	0		0
19081514	193386	cell morphology	U19 Huang	0.35	1	30801	19906	11199	TRUE	TRUE	Fezf2-creER+LSL-flp	https://download.brainimagelibrary.org/00/9c/009c1e6fcc03ebac/mouseID_019081514-193386/	/bil/data/00/9c/009c1e6fcc03ebac/mouseID_019081514-193386/	fMOST	mouse	0	0	0		0
19081515	193387	cell morphology	U19 Huang	0.35	1	29401	17797	11681	TRUE	TRUE	Fezf2-creER+LSL-flp	https://download.brainimagelibrary.org/00/9c/009c1e6fcc03ebac/mouseID_019081515-193387/	/bil/data/00/9c/009c1e6fcc03ebac/mouseID_019081515-193387/	fMOST	mouse	0	0	0		0
NA	190522	population imaging	U19 Huang	1	50	11377	8557	260	TRUE	FALSE	NA	https://download.brainimagelibrary.org/a8/a9/a8a98350a17b8e2d/190522_JH_HK0148_Fezf2LSLflp_RSPv_retrosplenial_male_processed/	/bil/data/a8/a9/a8a98350a17b8e2d/190522_JH_HK0148_Fezf2LSLflp_RSPv_retrosplenial_male_processed/	STPT	mouse	0	0	0		0
NA	190628	population imaging	U19 Huang	1	50	11377	8557	260	TRUE	FALSE	NA	https://download.brainimagelibrary.org/d9/73/d973913c656b5f07/190628_JH_HK0178_Fezf2LSLflp_ORBm_MO_male_processed/	/bil/data/d9/73/d973913c656b5f07/190628_JH_HK0178_Fezf2LSLflp_ORBm_MO_male_processed/	STPT	mouse	0	0	0		0
NA	190626	population imaging	U19 Huang	1	50	11377	8557	260	TRUE	FALSE	NA	https://download.brainimagelibrary.org/d6/fa/d6fafa4053c775df/190626_JH_HK0172_Fezf2LSLflp_VLSl_V2L_male_processed/	/bil/data/d6/fa/d6fafa4053c775df/190626_JH_HK0172_Fezf2LSLflp_VLSl_V2L_male_processed/	STPT	mouse	0	0	0		0
NA	190625	population imaging	U19 Huang	1	50	11377	8557	258	TRUE	FALSE	NA	https://download.brainimagelibrary.org/89/4f/894f11719716d433/190625_JH_HK0169_PlexinD1LSLflp_SSs_S2_male_processed/	/bil/data/89/4f/894f11719716d433/190625_JH_HK0169_PlexinD1LSLflp_SSs_S2_male_processed/	STPT	mouse	0	0	0		0
NA	190710	population imaging	U19 Huang	1	50	11377	8557	259	TRUE	FALSE	NA	https://download.brainimagelibrary.org/58/79/5879dc7592bd873f/home/	/bil/data/58/79/5879dc7592bd873f/home/	STPT	mouse	0	0	0		0
NA	190718	population imaging	U19 Huang	1	50	11377	8557	259	TRUE	FALSE	NA	https://download.brainimagelibrary.org/aa/72/aa72f327d8d79899/home/	/bil/data/aa/72/aa72f327d8d79899/home/	STPT	mouse	0	0	0		0
NA	190720	population imaging	U19 Huang	1	50	11377	8557	260	TRUE	FALSE	NA	https://download.brainimagelibrary.org/ec/f1/ecf14f82960392ed/home/	/bil/data/ec/f1/ecf14f82960392ed/home/	STPT	mouse	0	0	0		0
NA	190805	population imaging	U19 Huang	1	50	11377	8557	260	TRUE	FALSE	NA	https://download.brainimagelibrary.org/06/ea/06ea02c3bf50c7b9/190805_JH_HK0199_PlexinD1LSLflp_MOp_FRT_female_processed/	/bil/data/06/ea/06ea02c3bf50c7b9/190805_JH_HK0199_PlexinD1LSLflp_MOp_FRT_female_processed/	STPT	mouse	0	0	0		0
NA	190823	population imaging	U19 Huang	1	50	11377	8557	260	TRUE	FALSE	NA	https://download.brainimagelibrary.org/5f/97/5f97820484265501/190823_JH_HK0208_PlexinD1LSLflp_PL_male_processed/	/bil/data/5f/97/5f97820484265501/190823_JH_HK0208_PlexinD1LSLflp_PL_male_processed/	STPT	mouse	0	0	0		0
NA	190827	population imaging	U19 Huang	1	50	11377	8557	260	TRUE	FALSE	NA	https://download.brainimagelibrary.org/f5/6c/f56c01fd48cfd224/190827_JH_HK0213_PlexinD1LSLflp_MOs_RFA_male_processed/	/bil/data/f5/6c/f56c01fd48cfd224/190827_JH_HK0213_PlexinD1LSLflp_MOs_RFA_male_processed/	STPT	mouse	0	0	0		0
NA	NA	connectivity	U01 Dong	1	1	12664	18955	9600	TRUE	FALSE	C57Bl6	https://download.brainimagelibrary.org/ba/ab/baababe50d01eafe/20220315_SW220203_03_LS_6x_1000z	/bil/data/ba/ab/baababe50d01eafe/20220315_SW220203_03_LS_6x_1000z	LSFM	mouse	0	0	0		0
NA	NA	NA	U01 Osten	0.26	1.06	8762	21368	18598	TRUE	TRUE	NA	Unpublished data	NA	LSFM	mouse	0	0	0		0
NA	NA	NA	U01 Osten	0.26	1.06	12632	24012	19710	TRUE	TRUE	NA	Unpublished data	NA	LSFM	mouse	0	0	0		0
NA	NA	NA	U01 Wu	1.87	2	7322	8588	3600	TRUE	TRUE	NA	Unpublished data	NA	LSFM	mouse	0	0	0		0
