# Supplementary material for: Full-Spectrum Neuronal Diversity and Stereotypy through Whole Brain Morphometry
Source: Research Square preprint supplement (doi:10.21203/rs.3.rs-3146034/v1), 2023-07-25
Supplement: Supplementary file 2 [file 8907ba8c59008968002446a9.xlsx]

## Sheet: SEU-ALLEN_Morphometry_0512
Soma ID	fMOST BrainID	Soma_X(Raw brain, in voxel)	Soma_Y(Raw brain, in voxel)	Soma_Z(Raw brain, in voxel)	Soma_X(CCFv3_25𝜇𝑚)	Soma_Y(CCFv3_25𝜇𝑚)	Soma_Z(CCFv3_25𝜇𝑚)	Production platform	Registered CCF Region	Local Traced	SEU-D15K
1	191797	9488.26	12907.3	1325.82	41.879	152.25	177.934	Hi5	MOB	0	0
2	191797	9520.88	12816.5	1345.43	42.905	152.916	176.329	Hi5	MOB	0	0
3	191797	9465.36	12822.4	1350.61	43.209	151.684	176.515	Hi5	MOB	0	0
4	191797	9446.88	12839.2	1498.69	50.94	151.525	177.062	Hi5	MOB	0	0
5	191797	9590.04	12979.9	1412.95	46.323	154.759	179.191	Hi5	MOB	0	0
6	191797	9646.15	12980	1333.85	42.158	155.888	179.008	Hi5	MOB	0	0
7	191797	9671.49	12927.4	1389.49	45.056	156.484	178.138	Hi5	MOB	0	0
8	191797	9492.88	12885	1361.09	43.717	152.392	177.583	Hi5	MOB	0	0
9	191797	9648.09	12857.1	1528.02	52.354	156.07	177.184	Hi5	MOB	0	0
10	191797	9612.45	12826	1356.83	43.429	154.999	176.39	Hi5	MOB	0	0
11	191797	9567.3	12767	1369	44.113	153.944	175.428	Hi5	MOB	0	0
12	191797	12542	12783.3	2093.57	81.166	217.09	176.367	Hi5	lot	0	0
13	191797	12033.5	12940.3	1704.83	59.503	207.093	177.389	Hi5	MOB	0	0
14	191797	11987	13012.8	1700.02	59.286	206.253	178.681	Hi5	MOB	0	0
15	191797	12782.7	12711.9	3319.72	157.982	220.988	184.846	Hi5	ACB	0	0
16	191797	15456.1	12948.2	3468.32	154.101	280.814	185.118	Hi5	OT	0	0
17	191797	15440.8	13058.2	3440.17	152.366	280.907	186.791	Hi5	OT	0	0
18	191797	15448.3	13071.4	3436.48	152.106	281.135	186.975	Hi5	OT	0	0
19	191797	9833.95	12760.6	1285.3	39.515	159.714	174.895	Hi5	MOB	0	0
20	191797	9846.59	12691.9	1414.49	46.275	160.136	173.834	Hi5	MOB	0	0
21	191797	9907.58	12877.1	1268.7	38.544	161.459	176.837	Hi5	MOB	0	0
22	191797	9913.48	12898.5	1380.12	44.362	161.801	177.352	Hi5	MOB	0	0
23	191797	9864.51	12795.9	1416.3	46.329	160.653	175.654	Hi5	MOB	0	0
24	191797	9985.16	12794.2	1434.43	47.166	163.328	175.533	Hi5	MOB	0	0
25	191797	9985.27	12774.5	1337.44	42.081	163.166	175.035	Hi5	MOB	0	0
26	191797	9869.86	12914.3	1350.07	42.827	160.811	177.63	Hi5	MOB	0	0
27	191797	9834.31	12885.3	1423.91	46.732	160.098	177.273	Hi5	MOB	0	0
28	191797	9829.34	12909.2	1326.15	41.618	159.869	177.552	Hi5	MOB	0	0
29	191797	9792.99	12858.8	1343.52	42.573	159.032	176.731	Hi5	MOB	0	0
30	191797	9833.05	12807.7	1355.16	43.156	159.879	175.804	Hi5	MOB	0	0
31	191797	9802.33	12774.9	1304.74	40.56	159.069	175.203	Hi5	MOB	0	0
32	191797	9827.92	12982.2	1372.67	44.029	159.996	178.898	Hi5	MOB	0	0
33	191797	9839.19	12978.5	1255.89	37.918	160.047	178.666	Hi5	MOB	0	0
34	191797	9779.9	12934.4	1251.05	37.736	158.664	177.96	Hi5	MOB	0	0
35	191797	9786.39	12974.1	1369.15	43.884	159.061	178.795	Hi5	MOB	0	0
36	191797	9741.06	12868.2	1199.7	35.108	157.606	176.806	Hi5	MOB	0	0
37	191797	14963.6	12941.7	3232.13	142.048	269.65	184.605	Hi5	OT	0	0
38	191797	15095.1	12862.1	3458.53	155.083	272.06	184.327	Hi5	OT	0	0
39	191797	15090	12944.2	3486.12	156.63	272.268	185.775	Hi5	OT	0	0
40	191797	15147.7	12877.3	3440.65	153.775	273.358	184.39	Hi5	OT	0	0
41	191797	15075.9	12836.8	3488.84	157.006	271.493	184.1	Hi5	OT	0	0
42	191797	15061.9	12794.2	3459.7	155.388	271.015	183.306	Hi5	OT	0	0
43	191797	15162	12879.4	3441.8	153.78	273.698	184.404	Hi5	OT	0	0
44	191797	15216.9	12882.8	3425.5	152.581	275.001	184.28	Hi5	OT	0	0
45	191797	14971.9	12754.5	3756.45	173.157	269.389	183.677	Hi5	SI	0	0
46	191797	14938.8	12685.3	3761.21	173.657	268.399	182.614	Hi5	SI	0	0
47	191797	8338.15	12890.6	1350.7	43.334	125.657	179.772	Hi5	MOB	0	0
48	191797	8335.56	12845.1	1425.77	47.242	125.695	179.11	Hi5	MOB	0	0
49	191797	8269.1	12888.7	1451.87	48.576	124.241	180.019	Hi5	MOB	0	0
50	191797	8392.74	12776.5	1382.63	45.022	126.86	177.775	Hi5	MOB	0	0
51	191797	11504	12919	1698.78	59.697	195.956	177.329	Hi5	MOB	0	0
52	191797	11503.4	12971.3	1711.92	60.426	196.013	178.308	Hi5	MOB	0	0
53	191797	11414.1	13002.8	1702.6	60.004	194.191	178.9	Hi5	MOB	0	0
54	191797	11402.7	12885.7	1686.94	59.149	193.782	176.765	Hi5	MOB	0	0
55	191797	11548.2	12851.1	1976.68	75.271	196.45	177.279	Hi5	MOB	0	0
56	191797	11620.1	12765.6	1979.83	75.36	197.822	175.742	Hi5	MOB	0	0
57	191797	11648.6	12883.2	1920.98	72.006	198.694	177.509	Hi5	MOB	0	0
58	191797	11635.8	12831	2068	80.485	198.11	177.383	Hi5	AON	0	0
59	191797	11668	12887.4	1976.9	75.19	199.029	177.852	Hi5	MOB	0	0
60	191797	11532.3	12872.1	1900.91	70.965	196.257	177.288	Hi5	MOB	0	0
61	191797	11447	12845.7	1905.04	71.268	194.419	176.893	Hi5	MOB	0	0
62	191797	11433.5	12789.4	1945.72	73.579	193.994	176.099	Hi5	MOB	0	0
63	191797	11434.1	12745	1950.29	73.826	193.931	175.334	Hi5	MOB	0	0
64	191797	11497.7	12967	1896.41	70.76	195.681	178.975	Hi5	MOB	0	0
65	191797	11428.2	12946.4	1881.52	69.974	194.207	178.588	Hi5	MOB	0	0
66	191797	11602.8	12896.6	1953.36	73.899	197.706	177.933	Hi5	MOB	0	0
67	191797	11543.3	12932.9	1902.19	71.042	196.581	178.367	Hi5	MOB	0	0
68	191797	11499.3	12767.1	1979.48	75.446	195.288	175.837	Hi5	MOB	0	0
69	191797	11418.8	12886	1919.22	72.108	193.869	177.693	Hi5	MOB	0	0
70	191797	11312.8	12896.1	1842.32	67.862	191.754	177.596	Hi5	MOB	0	0
71	191797	11356.4	12720.9	1973.57	75.214	192.232	175.074	Hi5	MOB	0	0
72	191797	11475.7	12691.8	1939.19	73.142	194.735	174.309	Hi5	MOB	0	0
73	191797	11557.4	12697.3	2028.93	78.219	196.317	174.842	Hi5	AON	0	0
74	191797	11709.6	12762.3	2084.3	81.341	199.518	176.23	Hi5	AON	0	0
75	191797	11747.5	12786.8	2023.85	77.791	200.464	176.285	Hi5	AON	0	0
76	191797	11674.7	12929.3	1959.28	74.184	199.263	178.499	Hi5	MOB	0	0
77	191797	11651.9	12721.2	2144.44	84.939	198.112	175.932	Hi5	AON	0	0
78	191797	11633	12814.2	2118.6	83.467	197.924	177.402	Hi5	AON	0	0
79	191797	11652.6	12750.6	2174.03	86.733	198.111	176.65	Hi5	AON	0	0
80	191797	11712.3	12701.4	2078.41	80.96	199.485	175.121	Hi5	AON	0	0
81	191797	10578.9	12766.2	2059.16	80.799	175.909	176.854	Hi5	AON	0	0
82	191797	10565.8	12797	2079.97	82.038	175.644	177.529	Hi5	AON	0	0
83	191797	10666.3	12675.2	2065.75	81.068	177.625	175.221	Hi5	AON	0	0
84	191797	10630.3	12639	2023.26	78.63	176.882	174.363	Hi5	AON	0	0
85	191797	10558.1	12674.2	2095	82.863	175.319	175.459	Hi5	AON	0	0
86	191797	10558.3	12669.5	2067.89	81.28	175.354	175.212	Hi5	AON	0	0
87	191797	10467.2	12809.9	2042.56	79.944	173.631	177.613	Hi5	AON	0	0
88	191797	10459.1	12950.5	10986.6	561.516	221.935	174.826	Hi5	unknow	1	0
89	191797	10484.5	12979.8	1560.37	53.282	174.471	178.697	Hi5	MOB	0	0
90	191797	10507.5	12896.4	1618.19	56.372	174.865	177.357	Hi5	MOB	0	0
91	191797	10434.6	12843.9	1566.61	53.693	173.233	176.333	Hi5	MOB	0	0
92	191797	10606.7	12857.4	1566.6	53.502	176.94	176.45	Hi5	MOB	0	0
93	191797	10577.9	12921.4	1562.61	53.311	176.403	177.599	Hi5	MOB	0	0
94	191797	10438.2	12922.3	1547.4	52.65	173.402	177.676	Hi5	MOB	0	0
95	191797	10469.6	12957.8	1501.82	50.182	174.109	178.171	Hi5	MOB	0	0
96	191797	13167.2	12847.3	3696.32	179.172	230.669	187.819	Hi5	ACB	0	0
97	191797	13078.8	12961.7	3745.03	182.531	229.382	189.902	Hi5	ACB	0	0
98	191797	13023.7	12971.5	3863.74	189.778	228.793	190.45	Hi5	HY	0	0
99	191797	12934.4	12772.6	2522.62	106.649	224.729	179.225	Hi5	AON	0	0
100	191797	12946.2	12793.8	2492.83	104.808	225.084	179.338	Hi5	AON	0	0
101	191797	12888.3	12824.8	2424.43	100.729	224.031	179.348	Hi5	AON	0	0
102	191797	12900.3	12680.6	2434.27	101.242	223.932	176.978	Hi5	AON	0	0
103	191797	12970.6	12850.5	2422.11	100.473	225.867	179.731	Hi5	AON	0	0
104	191797	12944.9	12887.2	2489.91	104.653	225.287	180.872	Hi5	AON	0	0
105	191797	12851.3	12856.3	2408.22	99.807	223.34	179.77	Hi5	AON	0	0
106	191797	12814.3	12834.1	2412.95	100.139	222.484	179.443	Hi5	AON	0	0
107	191797	13113	13005.7	2397.31	98.78	229.347	182.077	Hi5	AON	0	0
108	191797	13092.3	13044.9	2385.61	98.123	229.012	182.662	Hi5	AON	0	0
109	191797	13175.1	12959.9	2491.34	104.335	230.44	181.98	Hi5	AON	0	0
110	191797	13204.8	12930.6	2488.94	104.136	231.011	181.467	Hi5	AON	0	0
111	191797	13115.9	12908.3	2438.99	101.27	229.107	180.759	Hi5	AON	0	0
112	191797	13085.8	12921.8	2429.06	100.725	228.507	180.926	Hi5	AON	0	0
113	191797	13237.8	13119.1	2443.65	101.301	232.257	184.167	Hi5	AON	0	0
114	191797	12994.9	12880.1	2431.75	101.029	226.443	180.29	Hi5	AON	0	0
115	191797	13058.2	12989.6	2409.54	99.608	228.109	181.927	Hi5	AON	0	0
116	191797	13054.5	13006.7	2458.01	102.538	227.998	182.56	Hi5	AON	0	0
117	191797	13197.2	13093.6	2454.01	102.014	231.303	183.86	Hi5	AON	0	0
118	191797	12949.1	12947.5	2470.6	103.477	225.556	181.724	Hi5	AON	0	0
119	191797	12917.6	12953.6	2402.48	99.396	225.007	181.338	Hi5	AON	0	0
120	191797	12895.2	12910	2371.94	97.565	224.473	180.393	Hi5	AON	0	0
121	191797	12917	12879	2368.85	97.335	224.874	179.84	Hi5	AON	0	0
122	191797	12873.1	12792.8	2379.23	97.983	223.711	178.47	Hi5	AON	0	0
123	191797	13094.8	12809.3	2509.22	105.563	228.3	179.673	Hi5	AON	0	0
124	191797	13065.8	12810.1	2470.3	103.237	227.738	179.386	Hi5	AON	0	0
125	191797	12930.9	12775.4	2439.28	101.55	224.804	178.612	Hi5	AON	0	0
126	191797	13003.4	12866.6	2530.05	107.001	226.438	180.819	Hi5	AON	0	0
127	191797	12859.6	12939.2	2366.5	97.295	223.784	180.858	Hi5	AON	0	0
128	191797	7608.97	12764.3	10237.9	528.015	153.521	178.387	Hi5	unknow	0	0
129	191797	7535.21	12879.8	10298.3	531.366	152.192	180.285	Hi5	unknow	0	0
130	191797	7372.05	13019.7	10226.2	528.014	147.823	183.391	Hi5	unknow	0	0
131	191797	7600.88	12876.7	10219	526.819	153.093	180.553	Hi5	COPY	0	0
132	191797	7356.09	12826.3	8667.2	446.838	138.425	186.917	Hi5	arb	0	0
133	191797	7377.39	12880.8	8673.76	447.15	138.84	187.838	Hi5	arb	0	0
134	191797	7423.8	12829.2	8703.56	448.466	139.908	186.894	Hi5	arb	0	0
135	191797	7361.56	12933.6	8657.81	446.437	138.428	188.769	Hi5	arb	0	0
136	191797	7406.08	12955	8686	447.746	139.419	189.087	Hi5	arb	0	0
137	191797	7417.65	12924.9	8692.93	448.032	139.689	188.557	Hi5	arb	0	0
138	191797	7485.87	12828.7	8729.6	449.579	141.228	186.826	Hi5	arb	0	0
139	191797	7318.83	12896.1	8636.89	445.477	137.519	188.167	Hi5	arb	0	0
140	191797	7308.99	12931.1	8636.19	445.51	137.316	188.771	Hi5	arb	0	0
141	191797	7264.38	12953.1	8609.45	444.311	136.314	189.195	Hi5	arb	0	0
142	191797	7297.5	13000	8622.22	444.896	136.992	189.971	Hi5	arb	0	0
143	191797	7501.28	12762.4	8740.42	450.017	141.612	185.661	Hi5	arb	0	0
144	191797	7505.69	12902.3	8736.91	449.951	141.609	188.078	Hi5	arb	0	0
145	191797	7091.3	13015.4	6611.36	335.251	115.059	195.659	Hi5	SCiw	1	0
146	191797	15506.6	12971.5	4085.01	189.235	283.891	186.788	Hi5	OT	0	0
147	191797	15363.2	12948.9	4071.64	189.049	280.516	186.604	Hi5	OT	0	0
148	191797	15482.9	13025.6	4088.32	189.457	283.586	187.724	Hi5	OT	0	0
149	191797	15324.6	12927.6	4090.76	190.282	279.686	186.328	Hi5	OT	0	0
150	191797	15412.4	13019.6	4072.29	188.83	281.891	187.705	Hi5	OT	0	0
151	191797	5316.87	12867.4	8409.9	440.271	96.04	187.905	Hi5	CENT3	0	0
152	191797	5399.72	12954.9	7025.14	359.775	86.196	190.988	Hi5	SCiw	1	0
153	191797	5420.52	13009.1	9703.86	511.153	100.629	186.691	Hi5	FOTU	0	0
154	191797	5314.74	13052.9	9701.68	511.51	98.129	187.474	Hi5	FOTU	0	0
155	191797	5348.21	12931.4	9685.52	510.502	98.989	185.342	Hi5	FOTU	0	0
156	191797	5340.9	12889.9	9679.26	510.202	98.848	184.615	Hi5	FOTU	0	0
157	191797	5617.95	12955.3	9143.83	479.397	104.363	187.673	Hi5	CUL4, 5	0	0
158	191797	5457.59	13000.6	9039.4	474.429	100.644	188.682	Hi5	CUL4, 5	0	0
159	191797	5312.72	12850.5	9671.16	509.891	98.218	183.928	Hi5	FOTU	0	0
160	191797	5395.44	12779.6	9657.61	508.782	100.174	182.715	Hi5	FOTU	0	0
161	191797	5240.39	12932	9680.46	510.709	96.483	185.352	Hi5	DEC	0	0
162	191797	5269.45	12973.3	9689.92	511.091	97.133	186.07	Hi5	FOTU	0	0
163	191797	5320.2	12787.6	8068.3	420.72	94.185	187.239	Hi5	ICc	0	0
164	191797	5361.98	12817.8	8088.73	421.824	95.221	187.719	Hi5	ICc	0	0
165	191797	5270.68	12793.9	8069.94	420.949	93.16	187.326	Hi5	ICc	0	0
166	191797	5432.85	12902.7	8106.06	422.727	96.876	189.128	Hi5	ICc	0	0
167	191797	5627.68	12746.5	8787.12	459.919	104.033	184.949	Hi5	CUL4, 5	0	0
168	191797	5514.83	12685.7	8786.76	460.273	101.565	183.828	Hi5	CUL4, 5	0	0
169	191797	5539.65	12758.2	8784.7	460.125	102.099	185.118	Hi5	CUL4, 5	0	0
170	191797	2902.56	12800.3	8455.13	450.152	41.457	185.073	Hi5	unknow	0	0
171	191797	2994.65	12847.6	8446.52	449.432	43.623	185.956	Hi5	CUL4, 5	0	0
172	191797	2918.26	12729.4	8488.34	451.937	41.793	183.757	Hi5	unknow	0	0
173	191797	2881.73	12678.5	8513.47	453.43	40.927	182.789	Hi5	unknow	0	0
174	191797	3009.51	12705.3	8497.75	452.183	43.91	183.351	Hi5	CUL4, 5	0	0
175	191797	2803.51	12809.9	8540.85	455.336	39.153	184.97	Hi5	unknow	0	0
176	191797	2863.74	12998.7	8595.41	458.448	40.597	188.153	Hi5	CUL4, 5	0	0
177	191797	2821.74	12907.5	8582.97	457.774	39.601	186.573	Hi5	unknow	0	0
178	191797	2936.78	12891.6	8587.95	457.711	42.272	186.321	Hi5	CUL4, 5	0	0
179	191797	2830.78	12775	8110.65	430.631	39.791	185.743	Hi5	unknow	0	0
180	191797	2952.34	12857.2	8167.57	433.651	42.89	187.048	Hi5	unknow	0	0
181	191797	2797.48	12914.7	8154.13	433.346	39.22	187.977	Hi5	unknow	0	0
182	191797	2848.23	12906.9	8257.46	439.12	40.407	187.535	Hi5	unknow	0	0
183	191797	15694.5	12970.2	3619.66	162.055	286.58	185.631	Hi5	OT	0	0
184	191797	7127.6	12745.4	10603.4	550.231	145.077	177.15	Hi5	unknow	0	0
185	191797	7293.05	12734.1	10648.5	551.962	149.141	176.548	Hi5	unknow	0	0
186	191797	7198.05	12779.2	10634.6	551.557	146.86	177.564	Hi5	unknow	0	0
187	191797	7167.4	12811	10632.7	551.54	146.127	178.203	Hi5	unknow	0	0
188	191797	15940.2	12805.7	4099.4	188.672	293.11	183.426	Hi5	OT	0	0
189	191797	15942.2	12686.6	4149.9	191.558	292.965	181.492	Hi5	OT	0	0
190	191797	16057.5	12717.9	4107.8	188.823	295.488	181.803	Hi5	unknow	0	0
191	191797	5547.69	12781.9	4026.5	194.348	69.403	189.407	Hi5	MOs6a	1	0
192	191797	15794.9	12827.1	4092.12	188.737	289.862	183.978	Hi5	OT	0	0
193	191797	9742.5	12717.9	3266.44	166.246	157.349	190.64	Hi5	CP	0	0
194	191797	9801.09	12776.7	3277.98	167.223	158.647	191.743	Hi5	CP	0	0
195	191797	9872.32	12787.1	3351.82	172.851	160.375	193.046	Hi5	CP	0	0
196	191797	9822.48	12701.3	3356.76	173.086	159.276	191.804	Hi5	CP	0	0
197	191797	9763.69	12687.8	3354.89	172.97	158.024	191.586	Hi5	CP	0	0
198	191797	12231.9	12943.3	3389.92	165.45	210.232	190.154	Hi5	ACB	1	0
199	191797	12334.7	12766.2	2809.26	126.113	211.256	182.01	Hi5	aco	0	0
200	191797	12395.8	12767.6	2793.08	124.887	212.603	181.819	Hi5	AON	0	0
201	191797	12377.9	13002.2	2681.43	117.713	212.973	184.654	Hi5	AON	0	0
202	191797	5046.53	12689.9	8006.97	417.785	87.923	185.629	Hi5	ICc	0	0
203	191797	5127.96	12748.8	8044.26	419.79	89.945	186.577	Hi5	ICc	0	0
204	191797	5115.53	12978.6	8137.55	425.437	90.431	190.255	Hi5	ICc	0	0
205	191797	5041.96	12973.8	8152.32	426.48	88.948	190.127	Hi5	ICc	0	0
206	191797	5218.17	12921.9	8256.44	431.919	93.238	189.114	Hi5	ICe	0	0
207	191797	5232.93	12727.8	8508.17	445.874	94.548	185.248	Hi5	CENT3	0	0
208	191797	5119.32	12799.8	8432.95	442.062	91.826	186.624	Hi5	CENT3	0	0
209	191797	5156.3	12829	8505.37	446.045	92.904	186.956	Hi5	CENT3	0	0
210	191797	4344.55	12959.2	8069.59	423.649	73.508	189.797	Hi5	ICc	0	0
211	191797	4389.55	12877.3	8256.32	434.209	75.243	188.029	Hi5	ICe	0	0
212	191797	4273.53	12814.9	8270.55	435.313	72.689	186.875	Hi5	ICe	0	0
213	191797	4336.43	12911.8	8554.52	451.343	74.786	187.864	Hi5	CUL4, 5	0	0
214	191797	4317.32	13026	8545.29	450.987	74.398	189.855	Hi5	CUL4, 5	0	0
215	191797	4253.69	13001.1	8504.74	448.876	72.882	189.47	Hi5	CUL4, 5	0	0
216	191797	14500.8	12820.9	3250.99	145.225	258.758	183.649	Hi5	OT	0	0
217	191797	14482.3	12819.5	3169.04	140.324	258.549	183.137	Hi5	OT	0	0
218	191797	14499.3	12837.8	3136.37	138.259	259.061	183.153	Hi5	OT	0	0
219	191797	14482	12773.1	3177.91	140.902	258.376	182.468	Hi5	OT	0	0
220	191797	14573.5	12793.6	3228.69	143.585	260.347	182.942	Hi5	OT	0	0
221	191797	14564.7	12783.1	3222.21	143.239	260.134	182.753	Hi5	OT	0	0
222	191797	12492.2	12669.2	2797.12	124.869	214.446	180.146	Hi5	AON	0	0
223	191797	12582.1	12972.9	2354.67	96.918	217.92	181.415	Hi5	AON	0	0
224	191797	12475.2	12858.9	2269.3	91.776	215.548	178.88	Hi5	AON	0	0
225	191797	12686.1	12972	2284.48	92.538	220.268	180.866	Hi5	AON	0	0
226	191797	12491.5	12989.2	2286.66	92.872	216.136	181.219	Hi5	AON	0	0
227	191797	12524.4	12896.7	2365.53	97.625	216.495	180.228	Hi5	AON	0	0
228	191797	12650.1	12848.6	2429.35	101.375	218.957	179.87	Hi5	AON	0	0
229	191797	5180.12	12763	4608.48	223.73	63.659	188.875	Hi5	MOp6a	1	0
230	191797	4227.51	12871.5	9588.18	509.569	73.218	184.366	Hi5	unknow	0	0
231	191797	4324.03	12892.6	9623.91	511.212	75.496	184.677	Hi5	unknow	0	0
232	191797	4231.23	12991.3	9617.91	511.224	73.338	186.48	Hi5	unknow	0	0
233	191797	4316.43	12785.4	9597.99	509.787	75.301	182.787	Hi5	unknow	0	0
234	191797	4325.38	12955.3	9635.97	511.884	75.531	185.79	Hi5	unknow	0	0
235	191797	4293.8	12993.7	9641.8	512.32	74.818	186.474	Hi5	unknow	0	0
236	191797	12514.6	12795.2	2325.8	95.152	216.144	178.206	Hi5	AON	0	0
237	191797	12459.6	12706.9	2341.52	96.129	214.75	176.836	Hi5	AON	0	0
238	191797	12566.9	12674.1	2360.84	97.178	216.926	176.399	Hi5	AON	0	0
239	191797	12627.8	12707.6	2360.84	97.126	218.301	176.954	Hi5	AON	0	0
240	191797	12494.8	12825.5	2340.12	96.067	215.757	178.837	Hi5	AON	0	0
241	191797	12401.5	12823.2	2378.73	98.554	213.676	179.129	Hi5	AON	0	0
242	191797	10168.9	12976.8	1402.12	45.236	167.531	178.534	Hi5	MOB	0	0
243	191797	10113.7	12990.1	1446.84	47.644	166.384	178.9	Hi5	MOB	0	0
244	191797	10205.9	12819.4	1558.33	53.493	168.27	176.052	Hi5	MOB	0	0
245	191797	10358.1	12849.6	2005.37	77.902	171.411	178.194	Hi5	AON	0	0
246	191797	10014.9	12776.1	1637.65	57.913	164.116	175.661	Hi5	MOB	0	0
247	191797	10068.8	13071.1	1434.65	47.025	165.482	180.341	Hi5	MOB	0	0
248	191797	9986.49	12854.6	10682.1	545.299	208.709	174.573	Hi5	unknow	0	0
249	191797	13898.5	12928.5	5004.13	245.485	255.545	189.528	Hi5	HY	1	0
250	191797	9565.92	12810.1	3139.83	156.532	153.564	189.955	Hi5	CP	0	0
251	191797	9506.41	12917.2	3978.76	213.842	155.246	199.035	Hi5	LSr	1	0
252	191797	4218.99	12750.6	8552.83	451.467	72.023	184.987	Hi5	CUL4, 5	0	0
253	191797	4312.69	12737	8522.37	449.438	74.104	184.901	Hi5	CUL4, 5	0	0
254	191797	3445.16	12955.7	7900.59	416.594	52.918	189.694	Hi5	ICc	0	0
255	191797	3584.67	12745.5	8458.35	448.168	57.343	184.608	Hi5	CUL4, 5	0	0
256	191797	3471.45	12762.7	8375.94	443.848	54.723	185.077	Hi5	CUL4, 5	0	0
257	191797	3529.71	12768.1	8478.09	449.493	56.082	184.884	Hi5	CUL4, 5	0	0
258	191797	3383.83	12877.6	8557.42	454.579	52.721	186.428	Hi5	CUL4, 5	0	0
259	191797	3460.62	12786.7	8588.46	456.012	54.475	184.816	Hi5	CUL4, 5	0	0
260	191797	3675.67	12959.2	7885.04	414.964	57.849	189.873	Hi5	ICd	0	0
261	191797	3706.15	12918.6	7874.81	414.243	58.386	189.218	Hi5	ICd	0	0
262	191797	3594.78	12965.4	6610.91	340.538	43.553	189.864	Hi5	RSPv6a	1	0
263	191797	3576.37	12930.1	5670.85	280.835	36.592	188.872	Hi5	RSPagl5	1	0
264	191797	3601.99	12977.6	8394.68	444.695	57.867	188.821	Hi5	CUL4, 5	0	0
265	191797	3592.56	12822.7	8528.47	452.203	57.575	185.738	Hi5	CUL4, 5	0	0
266	191797	3569.38	12789.4	8608.06	456.767	57.02	184.912	Hi5	CUL4, 5	0	0
267	191797	3615.04	12969.4	8556.64	453.859	58.168	188.238	Hi5	CUL4, 5	0	0
268	191797	3686.26	12813.3	9666.74	515.53	61.369	183.127	Hi5	unknow	0	0
269	191797	3745.08	12849.6	9690.83	516.691	62.765	183.741	Hi5	unknow	0	0
270	191797	3577.15	12885.1	9626.7	513.691	58.737	184.508	Hi5	unknow	0	0
271	191797	4158.2	12901.8	8252.16	434.696	70.146	188.326	Hi5	ICe	0	0
272	191797	3105.42	12835.8	5853.39	292.552	27.499	187.016	Hi5	RSPd5	1	0
273	191797	3183.71	12826	8262.53	438.339	48.168	186.334	Hi5	ICe	0	0
274	191797	3151.36	12794	8343.4	443.025	47.323	185.47	Hi5	CUL4, 5	0	0
275	191797	3165.76	12743.9	8322.1	441.72	47.643	184.702	Hi5	unknow	0	0
276	191797	3055.76	12795.9	8458.46	449.885	45.027	185.06	Hi5	CUL4, 5	0	0
277	191797	3046.03	12770.7	8547.06	454.946	44.784	184.362	Hi5	CUL4, 5	0	0
278	191797	3153.75	12720.8	8537.96	454.055	47.28	183.576	Hi5	CUL4, 5	0	0
279	191797	13245.2	12985.7	3631.79	174.738	232.484	189.696	Hi5	ACB	0	0
280	191797	13171.6	12975.7	3468.03	165.1	230.393	189.109	Hi5	ACB	0	0
281	191797	13160	12940.3	3421.53	162.276	229.924	188.36	Hi5	ACB	0	0
282	191797	13214.3	13077	3469.87	164.864	231.627	190.64	Hi5	ACB	0	0
283	191797	9053.36	12813.5	6880.92	347.932	158.559	191.313	Hi5	RN	1	0
284	191797	2725.87	12760.2	8461.95	451.007	37.331	184.305	Hi5	unknow	0	0
285	191797	13786.7	12914.6	2713.37	115.602	243.82	181.77	Hi5	AON	0	0
286	191797	13843.4	12934.7	2780.76	119.323	245.149	182.452	Hi5	AON	0	0
287	191797	12656.1	12782.6	2809.4	125.204	218.27	181.95	Hi5	AON	0	0
288	191797	6309.39	12828.8	3608.81	175.051	84.927	190.284	Hi5	MOs6a	1	0
289	191797	6254.81	12828.3	5724.87	287.499	86.639	192.301	Hi5	CA1	0	0
290	191797	6242.78	12868.4	5726.94	287.657	86.53	192.907	Hi5	CA1	0	0
291	191797	6126.92	12877.3	2978.06	136.576	77.567	187.903	Hi5	MOs5	1	1
292	191797	7753.5	12959.4	2308.57	96.845	113.888	184.964	Hi5	FRP5	1	0
293	191797	4676.89	12977.4	8524.16	448.663	82.429	189.256	Hi5	CUL4, 5	0	0
294	191797	4725.33	12933.1	8441.01	443.791	83.273	188.712	Hi5	CUL4, 5	0	0
295	191797	4776.12	12930.6	8401.89	441.428	84.272	188.782	Hi5	MB	0	0
296	191797	4805.8	13040.1	8454.26	444.409	85.141	190.545	Hi5	CENT3	0	0
297	191797	4799.93	12833.3	8502.96	446.965	85.047	186.885	Hi5	CUL4, 5	0	0
298	191797	4619.3	12748.3	5887.01	294.721	58.149	187.589	Hi5	dhc	1	0
299	191797	4810.52	12766.5	8023.32	419.451	83.081	186.814	Hi5	ICc	0	0
300	191797	4848.74	12711.5	7974.52	416.46	83.52	185.984	Hi5	ICc	0	0
301	191797	4846.26	12654.1	7948.17	414.88	83.233	185.065	Hi5	ICd	0	0
302	191797	4696.31	12776.9	5582.06	276.702	57.553	187.808	Hi5	ccb	1	0
303	191797	6056.16	12807	5546.82	277.348	81.777	191.137	Hi5	CA1	0	0
304	191797	4951.36	12932.2	6957.56	356.857	76.276	190.137	Hi5	SCig	1	0
305	191797	4900.9	12781.6	5379.85	265.354	60.362	188.103	Hi5	cing	1	0
306	191797	10592.9	13050.9	1592.12	54.857	176.884	179.975	Hi5	MOB	0	0
307	191797	10704	12852.8	1662.39	58.556	178.993	176.579	Hi5	MOB	0	0
308	191797	13445.7	12815.9	2702.42	116.258	235.877	180.803	Hi5	AON	0	0
309	191797	13592.8	13049.6	3377.9	157.033	239.521	189.222	Hi5	ACB	0	0
310	191797	13572	12997	3368.12	156.601	238.886	188.375	Hi5	ACB	0	0
311	191797	13625.3	12759.1	3053.85	136.901	239.456	182.377	Hi5	AON	0	0
312	191797	12015.9	12858	1785.31	64.014	206.511	176.259	Hi5	MOB	0	0
313	191797	11683.2	12825.4	10913.9	555.732	248.994	170.894	Hi5	unknow	1	0
314	191797	3965.74	12760.7	7985.24	419.726	64.646	186.481	Hi5	ICc	0	0
315	191797	3892.2	12826.4	7936.98	417.207	62.799	187.642	Hi5	ICc	0	0
316	191797	3863.59	12813.3	8079.05	425.541	62.974	187.109	Hi5	ICc	0	0
317	191797	4030.63	12747.3	8070.62	424.466	66.52	186.102	Hi5	ICc	0	0
318	191797	4070.11	12658.2	8080.77	424.846	67.349	184.6	Hi5	ICc	0	0
319	191797	14218.8	12755.8	5943.8	293.208	269.47	185.774	Hi5	TU	0	0
320	191797	12481.4	5240.89	4696.89	220.404	206.726	62.652	Hi5	AIp2/3	1	1
321	191797	10494.6	5196.64	5561.26	272.926	169.26	67.733	Hi5	VISC6a	0	0
322	191797	10490.9	5127.28	5643.8	277.041	169.752	66.092	Hi5	VISC6a	0	0
323	191797	10702.8	5122.04	4697.25	224.304	169.83	63.975	Hi5	SSs5	0	0
324	191797	8007.29	5229.6	5573.69	276.852	122.207	66.361	Hi5	SSs5	1	0
325	191797	9922.88	5127.14	5934.52	293.621	161.91	65.754	Hi5	TEa6a	0	0
326	191797	7223.93	5117.15	5152.23	252.98	103.126	60.854	Hi5	SSs2/3	1	1
327	191797	11940.4	4578.66	5336.26	255.212	197.098	52.165	Hi5	AIp5	0	0
328	191797	10743.5	4580.29	5458.72	264.429	173.022	54.587	Hi5	VISC5	1	0
329	191797	9482.73	4592.75	6540.78	325.509	157.948	51.424	Hi5	TEa6a	1	0
330	191797	9428.55	4379.14	6923.24	346.095	159.798	44.456	Hi5	ECT5	1	0
331	191797	9729.04	4371.18	4366.87	204.417	147.248	45.513	Hi5	SSs1	1	1
332	191797	7777.28	4515.04	7293.96	369.076	130.543	44.156	Hi5	TEa4	1	0
333	191797	12313.1	4556.24	5578.65	268.028	206.642	50.348	Hi5	AIp2/3	1	0
334	191797	10308	4403.36	6328.36	311.891	171.942	48.37	Hi5	ECT5	0	0
335	191797	10328.1	4436.62	5254.4	253.397	163.622	51.783	Hi5	SSs5	1	0
336	191797	9998.61	4516.43	5911.96	290.192	162.127	53.019	Hi5	TEa5	1	0
337	191797	11021.6	4391.2	4941.76	234.351	176.247	49.128	Hi5	VISC4	1	0
338	191797	11752.9	4369.07	5497.51	263.887	194.044	48.118	Hi5	AIp5	0	0
339	191797	6388.67	4441.7	6393.11	320.952	93.929	44.377	Hi5	AUDp2/3	1	1
340	191797	7398.24	4346.29	6705.25	337.755	117.521	43.36	Hi5	AUDp5	1	0
341	191797	10536	4384.32	5772.06	281.194	171.133	50.089	Hi5	TEa5	1	0
342	191797	13759	14672.8	3445.67	156.14	249.35	214.421	Hi5	SI	0	0
343	191797	13846	14540.8	3300.87	147.558	250.524	211.569	Hi5	SI	0	0
344	191797	14365.4	14600	7416.47	369.838	276.408	212.596	Hi5	P	1	0
345	191797	14326.6	14629.3	9103.18	455.034	290.448	205.531	Hi5	MY	1	0
346	191797	14383	14675.6	3388.65	150.351	263.253	213.685	Hi5	OT	0	0
347	191797	14306	14610.5	3480.16	156.004	261.484	213.14	Hi5	OT	0	0
348	191797	14282.2	14619	3428.44	153.081	260.87	213.052	Hi5	OT	0	0
349	191797	14265.3	14645.9	3362.26	149.297	260.448	213.169	Hi5	OT	0	0
350	191797	14222.3	14638.5	3360.76	149.373	259.454	213.078	Hi5	OT	0	0
351	191797	14229.7	14533.2	8725.89	435.668	283.283	205.707	Hi5	MY	1	0
352	191797	7639.82	14476.4	4081.73	211.296	118.203	217.771	Hi5	LSc	0	0
353	191797	7690.36	14574.9	4205.43	218.273	119.35	219.263	Hi5	LSr	0	0
354	191797	7593.98	14795.4	4055.87	209.796	117.864	221.968	Hi5	LSc	0	0
355	191797	13156.4	14800.1	3272.37	148.099	235.898	215.863	Hi5	STR	0	0
356	191797	13219.9	14752.7	3298.35	149.56	237.207	215.264	Hi5	SI	0	0
357	191797	13388.1	14895.9	3278.63	146.986	241.466	217.149	Hi5	STR	0	0
358	191797	13390.3	14829.7	3229.26	144.233	241.187	215.844	Hi5	STR	0	0
359	191797	13373.8	14786.9	3224.72	144.174	240.66	215.182	Hi5	STR	0	0
360	191797	13391.1	14643.6	3234.94	145.199	240.568	213.081	Hi5	SI	0	0
361	191797	4436.95	14718.6	7552.07	394.032	72.847	219.928	Hi5	SCiw	1	0
362	191797	13676.7	5175.76	5911.22	286.254	240.632	58.812	Hi5	PIR	1	0
363	191797	10488.5	14566.5	8777.5	445.07	198.35	213.497	Hi5	PRP	0	0
364	191797	10625	14699.4	8842.76	448.136	201.617	215.351	Hi5	PRP	0	0
365	191797	10680.1	14735.3	8749.49	443.363	202.209	216.035	Hi5	PRP	0	0
366	191797	6728.84	14635.2	8455.34	439.444	125.238	217.865	Hi5	CENT3	0	0
367	191797	6802.44	14569.2	8455.19	439.158	126.619	216.745	Hi5	CENT2	0	0
368	191797	6785.88	14679.4	8451.15	439.064	126.318	218.603	Hi5	CENT2	0	0
369	191797	6762.94	14717.1	8449.77	439.087	125.888	219.243	Hi5	CENT3	0	0
370	191797	6829.39	14655	8745.67	454.218	128.678	217.988	Hi5	CENT3	0	0
371	191797	6827.28	14698.9	8745.23	454.23	128.65	218.73	Hi5	CENT3	0	0
372	191797	6778.19	14743.3	8741.09	454.226	127.683	219.492	Hi5	CENT3	0	0
373	191797	6661.87	14764.4	8725.14	453.853	125.32	219.878	Hi5	CENT3	0	0
374	191797	6858.25	14782.4	8748.9	454.352	129.307	220.129	Hi5	CENT3	0	0
375	191797	6803.04	14837.8	8735.91	453.923	128.182	221.085	Hi5	CENT3	0	0
376	191797	6638.79	14647.8	8729.07	454.076	124.84	217.911	Hi5	CENT3	0	0
377	191797	6756.19	14532.9	8738.45	454.047	127.168	215.947	Hi5	CENT3	0	0
378	191797	6536.28	14689.2	9261.51	481.745	124.562	218.148	Hi5	CUL4, 5	0	0
379	191797	6485.15	14757.5	9237.84	480.816	123.425	219.383	Hi5	CUL4, 5	0	0
380	191797	6483.38	14631.4	9361.85	487.112	123.591	216.95	Hi5	DEC	0	0
381	191797	6568.36	14697.4	9307.8	483.943	125.345	218.201	Hi5	CUL4, 5	0	0
382	191797	6553.91	14744.2	9327.26	485.018	125.076	218.987	Hi5	CUL4, 5	0	0
383	191797	6515.04	14722.1	9352.11	486.473	124.274	218.561	Hi5	DEC	0	0
384	191797	6558.3	14799.8	9332.45	485.275	125.189	219.952	Hi5	CUL4, 5	0	0
385	191797	6746.51	14823.5	10209.1	527.823	132.179	217.893	Hi5	unknow	0	0
386	191797	6764.66	14706.5	10259.5	530.449	132.957	215.473	Hi5	unknow	0	0
387	191797	6728.43	14666.6	10164.4	525.796	131.538	215.071	Hi5	PYR	0	0
388	191797	6769.5	14624	10260.7	530.571	133.104	213.89	Hi5	unknow	0	0
389	191797	6802.32	14620.7	10328.4	533.991	134.335	213.558	Hi5	unknow	0	0
390	191797	6814.81	14660.2	10355.1	535.322	134.804	214.206	Hi5	unknow	0	0
391	191797	7132.32	14726.8	8830.11	457.43	135.061	219.062	Hi5	CENT3	0	0
392	191797	7142.55	14681.2	8837.25	457.722	135.281	218.285	Hi5	CENT3	0	0
393	191797	7220.9	14639.7	8903.64	460.729	137.168	217.51	Hi5	CENT3	0	0
394	191797	7225.17	14704.1	8905.25	460.832	137.29	218.594	Hi5	CENT3	0	0
395	191797	7207.74	14737.9	8886.72	459.993	136.859	219.185	Hi5	CENT3	0	0
396	191797	7071.6	14819.5	8803.6	456.373	133.773	220.662	Hi5	CENT3	0	0
397	191797	7227.79	14838.5	8892.85	460.285	137.334	220.871	Hi5	CENT3	0	0
398	191797	7205.22	14605.3	8889	460.035	136.764	216.947	Hi5	CENT3	0	0
399	191797	7155.82	14576.9	8849	458.198	135.564	216.514	Hi5	CENT3	0	0
400	191797	7117.88	14458	8835.39	457.578	134.711	214.531	Hi5	CENT3	0	0
401	191797	7453.55	14729.8	10170.2	522.196	147.893	215.268	Hi5	PYR	0	0
402	191797	7418.4	14830.3	10124.9	519.994	146.753	217.415	Hi5	PYR	0	0
403	191797	7446.71	14874.7	10164.9	521.861	147.648	218.045	Hi5	PYR	0	0
404	191797	7460.93	14864.7	10175.4	522.341	148.045	217.79	Hi5	PYR	0	0
405	191797	7461.01	14829.2	10188.9	523.053	148.158	217.06	Hi5	PYR	0	0
406	191797	7253.05	14795.9	8449.53	437.643	135.089	220.439	Hi5	CENT2	0	0
407	191797	7193.55	14737.8	8495.52	440.178	134.237	219.442	Hi5	CENT2	0	0
408	191797	7152.35	14724.8	8490.09	440.008	133.437	219.243	Hi5	CENT2	0	0
409	191797	7114.48	14703.3	8485.9	439.887	132.701	218.897	Hi5	CENT2	0	0
410	191797	7128.17	14743.6	8489.89	440.082	132.993	219.566	Hi5	CENT2	0	0
411	191797	7139.89	14804.2	8485.71	439.87	133.21	220.583	Hi5	CENT2	0	0
412	191797	7170.81	14643.9	8495.03	440.154	133.781	217.873	Hi5	CENT2	0	0
413	191797	7289.49	14712.2	8513.76	440.826	136.109	218.962	Hi5	CENT2	0	0
414	191797	7067.26	14788.7	8480.3	439.793	131.82	220.35	Hi5	CENT2	0	0
415	191797	7288.32	14609.4	8514.88	440.81	136.062	217.236	Hi5	CENT2	0	0
416	191797	7329.52	14592.8	8520.99	440.992	136.854	216.936	Hi5	CENT2	0	0
417	191797	7314.42	14529.6	8521.1	440.992	136.56	215.881	Hi5	CENT2	0	0
418	191797	7287.99	14529.5	8513.18	440.661	136.025	215.896	Hi5	CENT2	0	0
419	191797	7412.43	14712.4	8546.03	442.137	138.565	218.89	Hi5	CENT2	0	0
420	191797	6792.48	14725.8	10719.1	555.948	137.197	214.374	Hi5	unknow	0	0
421	191797	6812.51	14791	10727.3	556.283	137.707	215.561	Hi5	unknow	0	0
422	191797	6882.79	14710.2	10722.6	555.692	139.294	213.931	Hi5	unknow	0	0
423	191797	6807.74	14865	10729.7	556.417	137.603	216.969	Hi5	unknow	0	0
424	191797	7246.67	14501.2	4226.42	216.19	109.754	217.866	Hi5	ccb	0	0
425	191797	7260.45	14592.2	4276.4	218.959	110.148	219.165	Hi5	LSc	0	0
426	191797	7316.9	14581.3	4225.24	216.687	111.413	219.034	Hi5	LSc	0	0
427	191797	7105.69	14617.1	4450.4	226.789	106.526	219.421	Hi5	LSc	0	0
428	191797	7412.55	14674.7	4144.54	213.179	113.742	220.314	Hi5	LSc	0	0
429	191797	7366.77	14852	10080.5	518	145.305	218.082	Hi5	PYR	0	0
430	191797	7359.59	14789.5	10075.2	517.807	145.132	216.937	Hi5	PYR	0	0
431	191797	7340.33	14731.9	10053.3	516.853	144.589	215.971	Hi5	PYR	0	0
432	191797	7295.51	14751.2	10003.5	514.609	143.296	216.596	Hi5	PYR	0	0
433	191797	7123.9	14643.6	9885.99	509.799	138.952	215.243	Hi5	PYR	0	0
434	191797	7200.1	14651.2	9915.99	510.869	140.763	215.192	Hi5	PYR	0	0
435	191797	7235.89	14583.2	9936.24	511.72	141.671	213.809	Hi5	PYR	0	0
436	191797	7686.52	14674.3	10422.6	534.864	155.208	212.787	Hi5	unknow	0	0
437	191797	7672.48	14643.6	10409.7	534.217	154.793	212.274	Hi5	unknow	0	0
438	191797	7588.36	14593	10306.7	528.917	152.049	211.863	Hi5	unknow	0	0
439	191797	13136.4	14687.1	3259.82	147.864	235.03	214.125	Hi5	STR	0	0
440	191797	13235.5	14755.5	3272.76	147.865	237.526	215.128	Hi5	STR	0	0
441	191797	12555.6	14587.8	3164.34	146.033	221.38	212.863	Hi5	AON	0	0
442	191797	10735.4	14775.3	9147.2	463.28	206.149	215.62	Hi5	PRP	0	0
443	191797	6462.75	14747.9	5092.7	256.501	92.596	220.723	Hi5	CA3	1	0
444	191797	6873.53	14746.3	10447.6	540.033	136.834	215.462	Hi5	unknow	0	0
445	191797	6858.7	14709.1	10434.7	539.425	136.406	214.816	Hi5	unknow	0	0
446	191797	6836.41	14721	10403	537.778	135.644	215.178	Hi5	unknow	0	0
447	191797	6826.63	14816.6	10380.3	536.498	135.214	217.093	Hi5	unknow	0	0
448	191797	6830.24	14864.1	10379.9	536.422	135.28	217.997	Hi5	unknow	0	0
449	191797	6876.67	14825.8	10445.3	539.824	136.862	216.983	Hi5	unknow	0	0
450	191797	6822.18	14728.5	10380.4	536.604	135.142	215.416	Hi5	unknow	0	0
451	191797	7167.87	14695.8	9036.6	467.585	136.881	218.365	Hi5	CUL4, 5	0	0
452	191797	7172.13	14869.1	8851.72	458.454	136.026	221.436	Hi5	CENT3	0	0
453	191797	7157.72	14809.9	9050.09	468.356	136.801	220.293	Hi5	CUL4, 5	0	0
454	191797	7196.75	14862.9	9043.36	467.894	137.574	221.182	Hi5	CUL4, 5	0	0
455	191797	7194.09	14655.1	9016.81	466.475	137.28	217.683	Hi5	CUL4, 5	0	0
456	191797	6795.69	14547.9	10313	533.278	134.1	212.232	Hi5	unknow	0	0
457	191797	6815.2	14523.2	10338.3	534.556	134.742	211.651	Hi5	unknow	0	0
458	191797	6818.47	14455.5	10332.7	534.312	134.804	210.378	Hi5	unknow	0	0
459	191797	6832.92	14506.7	10388.6	537.215	135.535	211.146	Hi5	unknow	0	0
460	191797	6833.64	14540.8	10382.7	536.849	135.491	211.814	Hi5	unknow	0	0
461	191797	6823.9	14582.9	10350	535.074	135.003	212.737	Hi5	unknow	0	0
462	191797	6878.1	14507.7	10436.6	539.612	136.941	210.946	Hi5	unknow	0	0
463	191797	6859.73	14488	10422.6	538.959	136.42	210.643	Hi5	unknow	0	0
464	191797	6860.33	14574.9	10427.3	539.127	136.434	212.279	Hi5	unknow	0	0
465	191797	6879.94	14616.9	10444.7	539.946	137.003	212.995	Hi5	unknow	0	0
466	191797	6922.09	14624.2	10484	541.91	138.277	212.945	Hi5	unknow	0	0
467	191797	6258.33	14596.2	10549.7	549.558	123.691	213.095	Hi5	unknow	0	0
468	191797	6319	14503.6	10555.4	549.572	125.141	211.247	Hi5	unknow	0	0
469	191797	6007.16	14758.7	8954.76	468.478	112.555	219.708	Hi5	CUL4, 5	0	0
470	191797	5998.35	14673.1	8953.78	468.423	112.343	218.231	Hi5	CUL4, 5	0	0
471	191797	6085.54	14699.2	8965.61	468.662	114.242	218.675	Hi5	CUL4, 5	0	0
472	191797	6202.6	14597.4	8987.02	469.193	116.766	216.909	Hi5	CUL4, 5	0	0
473	191797	6160.58	14731.8	8975.91	468.875	115.875	219.23	Hi5	CUL4, 5	0	0
474	191797	6248.95	14596.4	8991.48	469.214	117.762	216.89	Hi5	CUL4, 5	0	0
475	191797	6133.31	14832.3	10100.4	526.343	117.71	218.963	Hi5	FOTU	0	0
476	191797	6147.77	14736.4	9992.2	520.888	117.553	217.403	Hi5	FOTU	1	0
477	191797	6141.73	14682.1	10098	526.299	117.892	216.093	Hi5	FOTU	0	0
478	191797	6096.32	14779.5	9174.31	479.486	114.87	219.886	Hi5	CUL4, 5	0	0
479	191797	6187.27	14748.3	9187.93	479.728	116.872	219.321	Hi5	CUL4, 5	0	0
480	191797	6090.19	14678.2	9178.63	479.698	114.723	218.111	Hi5	CUL4, 5	0	0
481	191797	6239.4	14557.8	8707.53	454.463	116.691	216.419	Hi5	CENT3	0	0
482	191797	4123.07	14796	10079.7	536.673	72.833	219.215	Hi5	unknow	0	0
483	191797	4050.73	14706.5	8865.55	471.601	68.568	218.569	Hi5	CUL4, 5	0	0
484	191797	7582.95	14716.6	8616.85	445.264	142.145	218.829	Hi5	CENT2	0	0
485	191797	7661.97	14798.3	8648.38	446.687	143.844	220.142	Hi5	CENT2	0	0
486	191797	7665.13	14701.4	8655.34	446.943	143.916	218.511	Hi5	CENT2	0	0
487	191797	7489.3	14705	8580.73	443.689	140.189	218.704	Hi5	CENT2	0	0
488	191797	7138.05	14619.4	8494.44	440.204	133.162	217.472	Hi5	CENT2	0	0
489	191797	12225.1	14542.6	2426.56	101.203	213.598	207.371	Hi5	MOB	0	0
490	191797	4058.63	14710.3	8399.06	445.091	68.964	218.964	Hi5	CUL4, 5	0	0
491	191797	4214.15	14633.1	9748.53	518.841	73.341	216.566	Hi5	unknow	0	0
492	191797	10928	14596.1	3222.65	160.705	185.663	215.548	Hi5	STR	1	0
493	191797	10989.2	14777.7	1995.29	77.004	186.865	211.516	Hi5	MOB	0	0
494	191797	3190.6	14598.8	8284.61	440.94	49.101	216.77	Hi5	CUL4, 5	0	0
495	191797	3117.45	14659.5	8158.79	433.702	47.495	217.97	Hi5	CUL4, 5	0	0
496	191797	3577.6	14534.4	8308.43	441.117	57.964	215.811	Hi5	CUL4, 5	0	0
497	191797	3482.67	14490.5	8210.81	435.617	55.775	215.137	Hi5	CUL4, 5	0	0
498	191797	3602.75	14428.9	8324.28	441.887	58.504	213.974	Hi5	CUL4, 5	0	0
499	191797	14491.1	14537.7	3453.23	154.007	265.281	211.719	Hi5	OT	0	0
500	191797	14552	14431.6	3485.92	155.942	266.29	210.126	Hi5	OT	0	0
501	191797	14381.7	14570.7	3440.59	153.563	262.933	212.271	Hi5	OT	0	0
502	191797	14415.5	14645.6	3420.47	152.123	263.939	213.338	Hi5	OT	0	0
503	191797	9186.1	14777.6	3586.96	191.229	150.642	221.174	Hi5	LSr	0	0
504	191797	9319.19	14531.4	2624.67	118.296	151.011	210.917	Hi5	ORBm5	0	0
505	191797	13411.1	14745.8	3187.86	141.971	241.281	214.307	Hi5	OLF	0	0
506	191797	13503.2	14666.3	7506.33	375.539	257.466	214.227	Hi5	TRN	1	0
507	191797	13397.6	14563.8	3326.3	151.064	240.573	212.447	Hi5	ACB	0	0
508	191797	3435.18	14642.1	8204.99	435.507	54.746	217.742	Hi5	CUL4, 5	0	0
509	191797	3541.01	14722.9	8153.49	432.177	57.108	219.242	Hi5	MB	0	0
510	191797	3339.74	14568.1	8357.84	444.775	52.465	216.218	Hi5	CUL4, 5	0	0
511	191797	3350.08	14500	8456.37	450.432	52.558	214.916	Hi5	CUL4, 5	0	0
512	191797	13948.4	14784.3	3370	150.493	253.886	215.583	Hi5	OT	0	0
513	191797	14126	14631.9	3282.75	145.281	257.1	212.659	Hi5	OT	0	0
514	191797	14063.3	14674.4	3299.15	146.324	255.888	213.449	Hi5	OT	0	0
515	191797	14102.1	14558.7	3247.42	143.514	256.227	211.357	Hi5	OT	0	0
516	191797	14025.2	14457.4	3240.15	143.59	254.123	209.817	Hi5	OT	0	0
517	191797	14021.6	14538.9	3205.59	141.439	254.27	210.903	Hi5	OT	0	0
518	191797	2530.35	14550.6	8656.91	464.355	33.032	215.339	Hi5	unknow	0	0
519	191797	14145.3	14572.3	7430.28	370.84	271.488	212.311	Hi5	PG	1	0
520	191797	10212.9	14618.2	8535.13	433.649	191.28	215.217	Hi5	PCG	1	0
521	191797	10238.1	14654.7	263.082	-16.157	167.317	205.455	Hi5	unknow	0	0
522	191797	4012.06	14670.7	8282.26	438.391	67.816	218.363	Hi5	CUL4, 5	0	0
523	191797	3911.93	14563.8	7276.1	378.983	58.331	217.239	Hi5	SCop	1	0
524	191797	9417.7	14710.7	3353.04	174.715	154.389	219.009	Hi5	ccg	1	0
525	191797	11772.4	14529.9	3286.14	160.205	203.921	214.135	Hi5	LSr	1	1
526	191797	8654.3	14690.1	3518.19	183.803	138.63	219.479	Hi5	ccg	0	0
527	191797	8746.18	14788.6	3517.78	184.455	140.833	220.844	Hi5	ccg	0	0
528	191797	8079.74	14680.9	3780.39	197.263	127.425	220.118	Hi5	LSc	0	0
529	191797	8173.93	14770.4	3758.99	196.693	129.53	221.297	Hi5	LSc	0	0
530	191797	3471.77	14727.9	8382.99	445.971	55.536	219.05	Hi5	CUL4, 5	0	0
531	191797	10251.9	14771.9	3599.27	191.528	173.093	220.66	Hi5	LSr	1	1
532	191797	7955.29	14636.2	3811.07	198.21	124.791	219.525	Hi5	ccb	0	0
533	191797	5677.15	14652.1	7715.4	400.768	100.025	218.969	Hi5	PAG	1	0
534	191797	8513.9	8584.53	4851.83	247.712	131.294	130.024	Hi5	CP	0	0
535	191797	8522.65	8668.63	4784.59	244.466	131.588	131.649	Hi5	CP	0	0
536	191797	8564.28	8781.19	4873	248.937	132.047	133.279	Hi5	CP	0	0
537	191797	8578.29	8654.02	4801.52	245.371	132.659	131.391	Hi5	CP	0	0
538	191797	8575.18	8682.32	4797.17	245.177	132.584	131.881	Hi5	CP	0	0
539	191797	8438.32	8687.65	4255.79	216.182	131.581	130.845	Hi5	CP	0	0
540	191797	9822.16	8930.41	4689.57	240.118	157.429	135.878	Hi5	CP	0	0
541	191797	9768.45	9037.12	4679.93	239.936	156.425	137.795	Hi5	CP	0	0
542	191797	9776.22	8812.89	4268.34	217.042	157.297	133.777	Hi5	CP	0	0
543	191797	5624.46	8739.68	9671.97	506.386	109.114	107.527	Hi5	ANcr2	0	0
544	191797	5706.96	8773.83	9688.35	507.109	111.047	108.067	Hi5	ANcr2	0	0
545	191797	5756.35	8644.23	9666.51	505.579	112.11	105.64	Hi5	ANcr2	1	0
546	191797	10344.8	8814.12	3934.71	196.415	168.09	130.976	Hi5	CP	0	0
547	191797	10368.4	8774.53	3274.49	154.097	166.205	122.77	Hi5	AId6a	0	0
548	191797	10262.8	8711.35	3291.07	155.217	164.11	121.986	Hi5	AId6a	0	0
549	191797	10276.8	8651.17	3289.42	154.872	164.26	120.882	Hi5	AId6a	0	0
550	191797	10270.6	8882.69	3234.19	151.966	164.307	124.234	Hi5	AId6a	0	0
551	191797	10273.6	8793.92	4296.47	217.503	166.638	132.853	Hi5	CP	0	0
552	191797	10189.1	8758.2	8329.49	420.301	194.099	114.312	Hi5	FL	1	0
553	191797	13995.9	8884.35	4655.57	224.241	243.498	124.192	Hi5	FS	0	0
554	191797	14007.3	8697.81	4541.82	217.724	242.475	120.741	Hi5	STR	0	0
555	191797	13929.9	8655.43	4620.6	222.164	241.208	120.569	Hi5	FS	0	0
556	191797	13941.5	8682.74	4606.35	221.407	241.441	120.931	Hi5	FS	0	0
557	191797	14100.1	8882.03	3841	178.306	241.294	120.963	Hi5	PIR	0	0
558	191797	14047.1	8793.72	3913.68	182.552	240.107	119.908	Hi5	PIR	0	0
559	191797	12113.3	14464.4	2309.32	94.411	210.973	205.791	Hi5	MOB	0	0
560	191797	14787	8720.7	5337.75	258.209	265.701	120.324	Hi5	BMAa	0	0
561	191797	7599.78	8717.07	8397.9	428.36	143.121	114.153	Hi5	SIM	0	0
562	191797	13999.4	8876.8	5060.56	245.73	245.938	125.12	Hi5	CEAc	0	0
563	191797	7755.69	9033.95	8452.12	430.537	146.758	119.663	Hi5	arb	1	0
564	191797	7792.86	8675.4	8764.7	447.07	150.006	111.167	Hi5	arb	0	0
565	191797	10930.2	8829.09	8573.22	431.9	211.204	113.381	Hi5	chpl	1	0
566	191797	10888	8742.72	3627.84	175.81	177.426	125.81	Hi5	CP	0	0
567	191797	13504.1	8700.1	5082.26	248.291	234.56	123.836	Hi5	CEAm	0	0
568	191797	13373.4	8806.18	4700.06	228.592	230.269	125.067	Hi5	CP	0	0
569	191797	13316.8	8815.01	4642.41	225.716	228.749	125.25	Hi5	CP	0	0
570	191797	13298.5	8847.58	4682.53	227.997	228.689	125.946	Hi5	CP	0	0
571	191797	13408.3	8820.09	4685.77	227.729	230.984	125.137	Hi5	CP	0	0
572	191797	13498.1	8841.22	4526.3	218.897	231.921	124.73	Hi5	CP	0	0
573	191797	13546.1	8854.49	4403.37	212.143	232.009	124.471	Hi5	CP	0	0
574	191797	13378.1	8811.59	4595.19	222.956	229.759	124.851	Hi5	CP	0	0
575	191797	13512.7	8925.69	4501.72	217.702	232.293	125.985	Hi5	CP	0	0
576	191797	13458.5	8729.61	3908.86	184.417	227.291	120.724	Hi5	EPd	0	0
577	191797	13403.1	8836.14	3615.08	167.197	226.262	120.842	Hi5	PIR	0	0
578	191797	15768.3	8768.61	4904.31	232.869	285.276	117.564	Hi5	PAA	0	0
579	191797	10473.6	8723.48	2838	124.732	166.624	116.108	Hi5	AId2/3	0	0
580	191797	10552	8743.45	4623.01	234.458	171.455	131.695	Hi5	CP	0	0
581	191797	10555	8845.68	4605.05	233.769	171.642	133.462	Hi5	CP	0	0
582	191797	10587.8	8799.39	8389.94	422.878	202.647	114.419	Hi5	FL	0	0
583	191797	10588.7	8780.73	3643.16	177.717	171.939	127.194	Hi5	CP	0	0
584	191797	12554.1	8918.96	3422.19	158.128	209.12	122.631	Hi5	OLF	0	0
585	191797	12482.1	9008.41	3388.28	156.474	207.773	123.986	Hi5	AIv5	0	0
586	191797	12502.8	8877.97	3421.53	158.111	208.06	122.055	Hi5	AIv5	0	0
587	191797	9401.55	8908.46	9673.72	495.009	189.634	108.355	Hi5	PRM	0	0
588	191797	9328.16	8999.65	9638.1	493.064	187.819	110.462	Hi5	PRM	0	0
589	191797	9356.25	8864.86	9672.32	495.068	188.698	107.612	Hi5	PRM	0	0
590	191797	13611.3	8710.09	4346.58	208.508	232.534	121.755	Hi5	CP	0	0
591	191797	12241.2	8806.7	4579.9	226.225	205.376	128.623	Hi5	CP	0	0
592	191797	12153.4	8908.56	4521.51	223.635	203.611	130.486	Hi5	CP	0	0
593	191797	12348.3	8798.28	4574.59	225.527	207.583	128.149	Hi5	CP	0	0
594	191797	4118.02	8792.42	5948.4	298.106	47.13	120.998	Hi5	VISrl5	1	0
595	191797	7187.62	8852.11	4921.05	248.535	103.675	131.587	Hi5	CP	0	0
596	191797	7187.68	8796.13	9424.85	486.653	142.252	109.55	Hi5	ANcr2	0	0
597	191797	5457.88	8895.79	7723.53	398.625	90.805	122.241	Hi5	RSPd5	1	0
598	191797	8795.86	8684.17	4512.26	230.628	137.898	132.243	Hi5	CP	0	0
599	191797	8766.01	8579.25	4439.44	226.389	137.572	130.205	Hi5	CP	0	0
600	191797	8688.81	8813.96	3909.93	196.526	136.569	130.89	Hi5	CP	0	0
601	191797	8715.07	8642.16	8520.35	432.273	166.532	111.597	Hi5	arb	0	0
602	191797	8520.55	8622.93	8464.73	429.853	162.282	111.599	Hi5	arb	0	0
603	191797	8632.66	8681.91	8559.01	434.35	165.225	112.151	Hi5	arb	0	0
604	191797	8651.04	8748.22	8564.61	434.552	165.615	113.357	Hi5	arb	0	0
605	191797	8739.3	8654.78	9810.06	504.578	177.095	103.425	Hi5	PRM	0	0
606	191797	8542.72	8634.27	9753.07	501.872	172.682	103.584	Hi5	PRM	0	0
607	191797	8654.05	8694.44	9843.99	506.72	175.558	104.044	Hi5	PRM	0	0
608	191797	8811.96	8737.32	10122.3	521.889	180.596	103.051	Hi5	unknow	0	0
609	191797	8596.81	8692.15	9832.33	506.218	174.303	104.131	Hi5	PRM	0	0
610	191797	8544.95	8710.25	9820.63	505.687	173.155	104.599	Hi5	PRM	0	0
611	191797	8608.44	8822.44	9861.44	507.771	174.709	106.404	Hi5	PRM	0	0
612	191797	8663.7	8866.16	9887.73	509.084	176.015	107.002	Hi5	PRM	0	0
613	191797	8520.07	8888.75	9867.09	508.315	172.9	107.716	Hi5	PRM	0	0
614	191797	4532.13	8795.62	8593.63	449.311	77.64	114.292	Hi5	ANcr1	0	0
615	191797	4414.06	8852.55	8931.14	468.266	77.687	113.76	Hi5	ANcr1	0	0
616	191797	4478.31	8877.68	8969.54	470.162	79.377	114.104	Hi5	ANcr1	0	0
617	191797	3910.04	8701.74	6683.48	343.117	49.115	118.043	Hi5	VISp5	0	0
618	191797	4388.78	8861.7	9447.68	497.447	79.604	111.51	Hi5	unknow	0	0
619	191797	4014.52	8831.71	9131.99	480.788	69.527	112.357	Hi5	unknow	0	0
620	191797	4088.96	8860.28	9217.42	485.353	71.657	112.545	Hi5	unknow	0	0
621	191797	4011.91	8870.16	9159.99	482.4	69.595	112.959	Hi5	unknow	0	0
622	191797	4009.61	8726.2	8830.78	464.105	67.767	111.598	Hi5	unknow	0	0
623	191797	11248	8752.49	3620.3	174.393	184.129	125.216	Hi5	CP	0	0
624	191797	15996.8	8737.58	5180.04	247.542	293.192	116.865	Hi5	PAA	1	0
625	191797	11319.6	8846.11	3331.13	155.708	184.866	123.286	Hi5	AId5	0	0
626	191797	11240.9	8735.81	3437.15	162.537	183.471	122.831	Hi5	CLA	0	0
627	191797	11344.1	8692.67	3885.04	190.092	186.473	126.309	Hi5	CP	0	0
628	191797	15218.6	8684.17	4401.55	206.265	268.922	116.22	Hi5	PIR	1	0
629	191797	11161	8845.91	4563.12	229.458	183.484	132.147	Hi5	CP	0	0
630	191797	9070.47	8633.29	4802.35	245.826	142.436	131.065	Hi5	CP	0	0
631	191797	9060.98	8696.47	10060.9	517.774	185.428	102.319	Hi5	unknow	0	0
632	191797	9070.5	8657.77	10051.7	517.254	185.564	101.643	Hi5	unknow	0	0
633	191797	9043.39	8711.69	10066.7	518.141	185.099	102.589	Hi5	unknow	0	0
634	191797	8997.85	8782.97	3367.22	162.14	139.614	124.518	Hi5	MOp6a	0	0
635	191797	9105.72	8687.61	4825.1	247.037	143.07	131.885	Hi5	int	0	0
636	191797	9014.6	8798	4083.75	206.944	143.029	132.475	Hi5	CP	0	0
637	191797	8798.77	8914.02	9906.24	509.722	178.93	107.628	Hi5	PRM	0	0
638	191797	8797.9	8868.62	9898.5	509.312	178.867	106.825	Hi5	PRM	0	0
639	191797	8898.65	8870.99	9902.17	509.236	180.979	106.724	Hi5	unknow	0	0
640	191797	8960.78	8936.65	9918.5	509.948	182.37	107.767	Hi5	unknow	0	0
641	191797	6339.67	8673.46	9270.27	480.674	122.974	108.157	Hi5	ANcr2	0	0
642	191797	6265.26	8681.9	9645.33	502.757	123.423	106.255	Hi5	ANcr2	0	0
643	191797	9068.73	8858.41	3686.66	182.967	143.268	129.781	Hi5	CP	0	0
644	191797	6141.13	8871.84	10212.9	535.501	122.941	107.566	Hi5	unknow	0	0
645	191797	6094.08	8810.64	10200.3	534.91	121.832	106.489	Hi5	unknow	0	0
646	191797	6124.02	8767.78	10201.5	534.854	122.518	105.657	Hi5	unknow	0	0
647	191797	6153.94	8735.06	10201.1	534.716	123.195	105.021	Hi5	unknow	0	0
648	191797	6264.34	8806.19	10217.3	535.316	125.748	106.228	Hi5	unknow	0	0
649	191797	6110.88	8950.99	10215.6	535.801	122.258	109.068	Hi5	unknow	0	0
650	191797	11413.6	8755.07	4579.41	229.165	188.353	130.001	Hi5	CP	0	0
651	191797	11518.5	8764.17	4560.6	227.776	190.453	129.88	Hi5	CP	0	0
652	191797	11517.2	8729.24	4575.46	228.498	190.377	129.307	Hi5	CP	0	0
653	191797	11590.2	8849.86	9137.3	461.387	230.92	108.089	Hi5	unknow	1	0
654	191797	14631.2	8917.47	3855.96	177.319	253.497	120.395	Hi5	PIR	0	0
655	191797	6159.42	8925.63	4399.57	217.304	81.865	128.925	Hi5	SSp-ul5	1	1
656	191797	13872.2	8663.73	4867.51	235.647	241.446	121.611	Hi5	act	0	0
657	191797	14465.5	8771.87	5318.39	257.912	258.118	122.217	Hi5	IA	1	0
658	191797	13656.2	8837.97	4422.53	212.753	234.437	123.875	Hi5	CP	0	0
659	191797	13650.1	8888.51	3556.39	162.975	231.576	120.739	Hi5	PIR	0	0
660	191797	13723.8	8785.01	3980.58	187.738	233.129	121.108	Hi5	OLF	0	0
661	191797	13652.7	8690.72	3915.09	183.938	231.348	119.449	Hi5	EPd	0	0
662	191797	13755.4	8711.32	3935.18	184.766	233.619	119.55	Hi5	PIR	0	0
663	191797	13838.5	8693.46	3865.28	180.268	235.324	118.634	Hi5	PIR	0	0
664	191797	8023.8	8774.25	4222.84	213.975	123.304	131.266	Hi5	CP	0	0
665	191797	8104.55	8825.45	4191.6	212.471	124.996	132.186	Hi5	CP	0	0
666	191797	8066.44	8769.08	9424.02	483.856	160.647	108.75	Hi5	PRM	0	0
667	191797	8103.11	8658.75	8365.65	425.627	153.183	112.938	Hi5	SIM	0	0
668	191797	8088.92	8751.77	3206.2	151.472	118.58	121.72	Hi5	MOp5	1	0
669	191797	12250.2	8779.25	3453.93	160.682	202.992	121.384	Hi5	AIv5	0	0
670	191797	12333.3	8795.83	3462.72	161.025	204.646	121.533	Hi5	AIv5	0	0
671	191797	8841.11	8844.89	3493.69	170.631	137.546	127.076	Hi5	MOp6b	0	0
672	191797	8917.2	8771.96	3385.09	163.304	138.085	124.502	Hi5	MOp6a	0	0
673	191797	8076.01	8782.51	4848.24	246.977	122.179	132.884	Hi5	CP	0	0
674	191797	8002.02	8772.35	4896.67	249.2	120.496	132.423	Hi5	CP	0	0
675	191797	8049.82	8707.27	4963.27	252.448	121.383	131.103	Hi5	CP	0	0
676	191797	8108.82	8683.68	4920.11	250.483	122.753	130.998	Hi5	CP	0	0
677	191797	8163.38	8761.68	4902.16	249.72	123.813	132.457	Hi5	CP	0	0
678	191797	7996.85	8710.68	4027.4	202.345	122.63	128.569	Hi5	CP	0	0
679	191797	8080.85	8907.18	4424.53	225.529	123.931	134.86	Hi5	CP	0	0
680	191797	8040.11	8975.82	4442.57	226.536	123.001	136.036	Hi5	CP	0	0
681	191797	8009.08	9016.19	4364.12	222.367	122.637	136.36	Hi5	CP	0	0
682	191797	7851.84	8793.2	9722.28	502.025	158.114	107.352	Hi5	PRM	0	0
683	191797	7851.58	8840.82	9741.81	503.148	158.21	108.15	Hi5	PRM	0	0
684	191797	7810.3	8681.55	9658.49	498.464	156.888	105.607	Hi5	PRM	0	0
685	191797	7953.34	8786.12	9749.55	503.299	160.407	106.979	Hi5	PRM	0	0
686	191797	8107.75	8888.79	4829.96	246.163	122.756	134.783	Hi5	CP	0	0
687	191797	4631.47	8872.48	9717.51	512.105	86.292	110.402	Hi5	unknow	0	0
688	191797	4631.6	8847.23	9749.63	513.9	86.43	109.789	Hi5	unknow	0	0
689	191797	4680	8826.77	9675.36	509.519	87.274	109.691	Hi5	unknow	0	0
690	191797	4713.46	8795.28	9799.27	516.425	88.546	108.559	Hi5	unknow	0	0
691	191797	4682.81	8726.04	9748.15	513.544	87.655	107.466	Hi5	unknow	0	0
692	191797	4729.8	8886.24	9020.35	472.117	85.373	114.116	Hi5	ANcr1	0	0
693	191797	4861.14	8815.16	9326.39	488.962	90.019	111.109	Hi5	unknow	0	0
694	191797	4715.83	9023.04	6419.33	326.275	64.948	125.845	Hi5	fp	1	0
695	191797	4668.31	9020.81	9846.98	519.485	87.599	112.664	Hi5	unknow	0	0
696	191797	4644.65	9002.98	9826.26	518.364	86.974	112.421	Hi5	unknow	0	0
697	191797	4659.74	8939.53	9816	517.674	87.311	111.254	Hi5	unknow	0	0
698	191797	4711.22	8980.67	9862.95	520.223	88.677	111.82	Hi5	unknow	0	0
699	191797	4780.47	8961.82	9887.77	521.407	90.392	111.33	Hi5	unknow	0	0
700	191797	4826.27	8854.05	9877.9	520.61	91.456	109.302	Hi5	unknow	0	0
701	191797	4783.15	8809.47	8629.68	450.409	83.565	114.54	Hi5	ANcr1	0	0
702	191797	4741.13	8722.02	8608.44	449.375	82.404	112.963	Hi5	ANcr1	0	0
703	191797	7005.15	8699.59	4511.48	226.944	101.008	128.237	Hi5	SSp-un6b	0	0
704	191797	7042.53	8875.68	4376.92	220.035	102.012	130.982	Hi5	SSp-ul6b	0	0
705	191797	6984.89	8825.51	4446.38	223.504	100.649	130.163	Hi5	SSp-ul6a	0	0
706	191797	6951.79	8957.13	4434.07	222.844	99.948	132.31	Hi5	SSp-ul6a	0	0
707	191797	7112.01	8664.97	8646.96	443.031	134.842	111.855	Hi5	ANcr1	0	0
708	191797	7153.53	8616	8631.54	442.096	135.594	110.993	Hi5	ANcr1	0	0
709	191797	7033.02	8585.05	8627.24	442.322	132.991	110.45	Hi5	ANcr1	0	0
710	191797	7066.18	8706.2	8656.3	443.67	133.946	112.606	Hi5	ANcr1	0	0
711	191797	7097.62	8902.73	10299.5	537.157	144.662	107.104	Hi5	unknow	0	0
712	191797	7191.92	8773.22	10169.8	529.658	146.188	105.114	Hi5	unknow	0	0
713	191797	7004.59	8950.28	4724.13	238.146	100.426	132.857	Hi5	ccb	0	0
714	191797	7008.92	8909.21	4807.49	242.336	100.309	132.125	Hi5	ccb	0	0
715	191797	6926.41	9022.05	4834.3	243.393	98.423	133.674	Hi5	ccb	0	0
716	191797	7015	8977.14	8960.13	460.453	135.236	116.163	Hi5	ANcr1	0	0
717	191797	7031.05	8915.78	8969.49	460.92	135.663	114.896	Hi5	ANcr1	0	0
718	191797	6909.29	8817.68	8995.3	462.852	133.3	112.783	Hi5	ANcr1	0	0
719	191797	7131.26	9002.69	8888.63	456.013	137.13	117.076	Hi5	ANcr1	0	0
720	191797	12719.6	8909.24	3076.61	135.678	212.578	118.741	Hi5	PIR	0	0
721	191797	12929.1	8830.53	4637.12	226.865	220.355	126.869	Hi5	CP	0	0
722	191797	12846.3	8834.38	4622.15	226.368	218.499	127.191	Hi5	CP	0	0
723	191797	12971.1	8905.92	5273.21	260.318	224.202	128.915	Hi5	CEAm	0	0
724	191797	13259.1	8879.15	3545.93	163.565	223.34	121.411	Hi5	PIR	0	0
725	191797	13236.4	8687.89	4655.91	226.473	226.698	123.501	Hi5	CP	0	0
726	191797	12793.2	8874.27	4062.26	195.986	214.743	126.198	Hi5	CP	0	0
727	191797	13227.1	8723.56	4524.24	219.49	225.804	123.776	Hi5	CP	0	0
728	191797	13133.8	8730.2	4576.07	222.629	224.149	124.355	Hi5	CP	0	0
729	191797	13248.4	8813.97	4454.68	215.871	226.036	124.996	Hi5	CP	0	0
730	191797	13301.5	8829.23	4399.83	212.759	226.794	124.912	Hi5	CP	0	0
731	191797	14366.2	8858.57	4468.52	212.846	250.246	121.881	Hi5	OLF	0	0
732	191797	14306.4	8796.9	4356.15	206.727	248.014	120.695	Hi5	PIR	0	0
733	191797	14411.8	8793.31	4444.37	211.249	250.955	120.562	Hi5	PIR	0	0
734	191797	14361.2	8738.43	3965.32	184.209	247.275	118.292	Hi5	PIR	0	0
735	191797	14381.2	8715.21	4041.16	188.452	247.935	118.101	Hi5	PIR	0	0
736	191797	14275.2	8953.63	4229.45	200.081	246.822	122.99	Hi5	PIR	0	0
737	191797	14204.6	8889.25	4173.18	197.044	244.783	121.979	Hi5	PIR	0	0
738	191797	5206.04	8767.94	9959.28	524.043	100.596	107.13	Hi5	unknow	0	0
739	191797	5091.32	8821.37	9943.93	523.555	97.87	108.273	Hi5	unknow	0	0
740	191797	5027.39	8780.02	9920.81	522.39	96.312	107.616	Hi5	unknow	0	0
741	191797	5086.69	8773.82	9936.04	523.075	97.745	107.404	Hi5	unknow	0	0
742	191797	5085.58	8741.12	9930.43	522.729	97.706	106.806	Hi5	unknow	0	0
743	191797	4972.2	8809.81	9911.9	522.073	94.989	108.248	Hi5	unknow	0	0
744	191797	5274.26	8836.49	8478.27	440.447	93.084	116.082	Hi5	SIM	1	0
745	191797	9264.42	8795.41	3341.79	160.348	144.849	124.504	Hi5	MOp6a	0	0
746	191797	9188.77	8751.32	3311.01	158.229	142.996	123.318	Hi5	MOp6a	0	0
747	191797	9033.57	8892.6	9912.7	509.448	183.845	106.886	Hi5	unknow	0	0
748	191797	9110.43	8902.09	9914.22	509.321	185.45	106.949	Hi5	unknow	0	0
749	191797	9124.71	8947.14	9933.14	510.32	185.876	107.644	Hi5	unknow	0	0
750	191797	9203.61	8951.56	9943.93	510.712	187.595	107.543	Hi5	unknow	0	0
751	191797	9225.24	9003.76	9981.44	512.725	188.31	108.237	Hi5	unknow	0	0
752	191797	9340.01	8664.74	4255.9	216.325	149.009	131.278	Hi5	CP	0	0
753	191797	9338.9	8860.71	3528.01	172.708	147.686	128.059	Hi5	CP	0	0
754	191797	9286.34	8988.26	3478.18	169.946	146.561	129.681	Hi5	CP	0	0
755	191797	9365.43	8971.08	3459.13	168.585	147.973	129.153	Hi5	CP	0	0
756	191797	9136.83	8731.07	9325.4	475.95	181.43	107.86	Hi5	PRM	0	0
757	191797	9171.26	8758.15	9271.78	472.819	181.649	108.718	Hi5	PRM	0	0
758	191797	9157.93	8705.91	9221.1	470.04	180.965	108.071	Hi5	PRM	0	0
759	191797	9160.35	8652.25	9253.89	471.97	181.313	106.805	Hi5	PRM	0	0
760	191797	9157.35	8618.6	9228.11	470.565	181.041	106.335	Hi5	PRM	0	0
761	191797	9095.83	8621.09	9296.2	474.5	180.398	105.978	Hi5	PRM	0	0
762	191797	9097.43	8648.43	9308.66	475.168	180.527	106.42	Hi5	PRM	0	0
763	191797	9169.83	8832.29	9266.57	472.423	181.548	110.192	Hi5	PRM	0	0
764	191797	12015	8886.38	3708.46	177.951	198.919	126.507	Hi5	CP	0	0
765	191797	11979.7	8877.19	3844.83	186.253	198.523	127.552	Hi5	CP	0	0
766	191797	12074	8922.01	3737.74	179.633	200.147	127.177	Hi5	CP	0	0
767	191797	12055.6	8707.39	3450.51	160.871	199.105	120.647	Hi5	AIv5	0	0
768	191797	12088.4	8909.43	3391.39	157.592	199.917	123.35	Hi5	AIv5	0	0
769	191797	10110	8701.18	4699.53	239.558	162.856	131.562	Hi5	CP	0	0
770	191797	10067.9	8691.22	3637.91	178.232	162.029	126.235	Hi5	CP	0	0
771	191797	4943.42	8782.87	9897.62	521.321	94.274	107.809	Hi5	unknow	0	0
772	191797	4918.65	8856	9906.72	521.979	93.713	109.175	Hi5	unknow	0	0
773	191797	4838.92	8628.6	9814.45	516.757	91.565	105.261	Hi5	unknow	0	0
774	191797	4858.23	8732.83	9854.41	519.069	92.143	107.075	Hi5	unknow	0	0
775	191797	4839.87	8888.77	9339.56	489.846	89.572	112.463	Hi5	unknow	0	0
776	191797	4940.53	8702.48	9298.79	487.042	91.725	109.051	Hi5	ANcr2	0	0
777	191797	4809.44	8774.1	9325	489.014	88.836	110.344	Hi5	unknow	0	0
778	191797	7109.68	8790.05	4692.03	236.827	102.842	130.512	Hi5	ccb	0	0
779	191797	4923.81	8780.32	9620.97	505.638	92.737	108.924	Hi5	unknow	0	0
780	191797	4868.52	8801.64	9632.63	506.494	91.494	109.308	Hi5	unknow	0	0
781	191797	4854.52	8846.25	9638.01	506.889	91.174	110.143	Hi5	unknow	0	0
782	191797	4856.94	8731.33	9624.96	506.02	91.217	108.003	Hi5	unknow	0	0
783	191797	8023.41	8845.92	9783.15	505.009	162.056	107.87	Hi5	PRM	0	0
784	191797	8108.94	8850.75	9799.38	505.682	163.94	107.795	Hi5	PRM	0	0
785	191797	8070.26	8793.2	9767.95	504.007	162.96	106.917	Hi5	PRM	0	0
786	191797	8130.43	8797.27	9785.09	504.814	164.318	106.842	Hi5	PRM	0	0
787	191797	8170.85	8732.89	9765.89	503.613	165.06	105.694	Hi5	PRM	0	0
788	191797	11433.9	8899.75	3337.87	156.014	187.154	124.077	Hi5	AId5	0	0
789	191797	8201.21	9040.26	9864.44	509.066	166.199	110.923	Hi5	PRM	0	0
790	191797	8309.35	8833.49	9814.79	505.971	168.213	107.201	Hi5	PRM	0	0
791	191797	8367.89	8927.42	9846.97	507.598	169.603	108.732	Hi5	PRM	0	0
792	191797	8304.98	8918.02	9840.52	507.423	168.257	108.653	Hi5	PRM	0	0
793	191797	8296.17	8962.81	9850.51	508.002	168.122	109.451	Hi5	PRM	0	0
794	191797	8425.51	8888.44	9839.33	507.007	170.763	107.984	Hi5	PRM	0	0
795	191797	8382.7	8796.57	9816.1	505.849	169.752	106.422	Hi5	PRM	0	0
796	191797	8257.92	8728.08	10231.1	529.617	169.477	102.985	Hi5	unknow	0	0
797	191797	8308.44	8729.43	10223.1	529.015	170.512	102.991	Hi5	unknow	0	0
798	191797	8359.12	8697.32	10210.9	528.189	171.524	102.394	Hi5	unknow	0	0
799	191797	8337.44	8768.95	10228.4	529.211	171.162	103.669	Hi5	unknow	0	0
800	191797	8369.41	8897.61	10258.9	530.763	172.015	105.88	Hi5	unknow	0	0
801	191797	8381.68	8957.98	10276.1	531.652	172.373	106.907	Hi5	unknow	0	0
802	191797	8339.96	8911.68	10268.3	531.37	171.438	106.133	Hi5	unknow	0	0
803	191797	8319.72	8955.74	10282.5	532.204	171.083	106.911	Hi5	unknow	0	0
804	191797	8259.89	8677.6	3619.68	177.775	126.036	124.781	Hi5	MOp6a	0	0
805	191797	8172.8	8725.02	3845.98	191.801	125.711	127.709	Hi5	ccb	0	0
806	191797	8231.16	8689.07	8484.5	431.326	156.699	112.806	Hi5	SIM	0	0
807	191797	8261.44	8663.13	8516.43	432.908	157.557	112.139	Hi5	arb	0	0
808	191797	8348.69	8641.17	8545.62	434.239	159.527	111.542	Hi5	arb	0	0
809	191797	8322.58	8771.31	9324.76	477.346	165.168	109.347	Hi5	PRM	0	0
810	191797	8150.27	8897.35	4081.17	206.37	125.988	132.799	Hi5	CP	0	0
811	191797	7622.13	8614.86	8889.54	454.473	147.467	109.304	Hi5	ANcr1	0	0
812	191797	7648.8	8699.68	8856.36	452.503	147.745	111.172	Hi5	ANcr1	0	0
813	191797	7626.95	8741.08	8839.39	451.616	147.153	112.093	Hi5	ANcr1	0	0
814	191797	7413.58	8831.28	9939.37	515.967	149.954	107.13	Hi5	unknow	0	0
815	191797	7347.96	8768.11	9325.53	480.212	144.985	109.666	Hi5	ANcr2	0	0
816	191797	7373.7	8722.55	9288.02	477.911	145.275	109.025	Hi5	arb	0	0
817	191797	7410.08	8651.78	9253.28	475.757	145.805	107.857	Hi5	arb	0	0
818	191797	7457.42	8633.29	10306.9	536.343	152.566	101.702	Hi5	unknow	0	0
819	191797	13011.4	8673.18	3668.59	171.25	218.093	119.485	Hi5	EPd	0	0
820	191797	13031.5	8558.96	3601.81	166.703	218.398	116.909	Hi5	PIR	0	0
821	191797	13011.4	8660.3	3638.43	169.356	218.075	119.018	Hi5	EPd	0	0
822	191797	13125.7	8827.84	4658.1	227.274	224.73	126.177	Hi5	CP	0	0
823	191797	13043.7	8848.92	4526.96	220.57	222.262	126.501	Hi5	CP	0	0
824	191797	12943.7	8575.41	4683.01	228.742	220.16	122.729	Hi5	CP	0	0
825	191797	12999.5	8663.52	4729.2	231.217	221.844	124.082	Hi5	CP	0	0
826	191797	4970.23	10506.7	9225.14	484.259	91.002	143.339	Hi5	ANcr1	0	0
827	191797	5005.85	10573.5	9264.82	486.505	91.925	144.369	Hi5	ANcr1	0	0
828	191797	5012.17	10623.3	9301.41	488.668	92.168	145.1	Hi5	ANcr1	0	0
829	191797	4872.64	10575.1	9234.61	485.241	88.738	144.514	Hi5	ANcr1	0	0
830	191797	4957.17	10646.5	9289.06	488.172	90.834	145.572	Hi5	ANcr1	0	0
831	191797	5022.23	10550.4	9371.14	492.642	92.714	143.432	Hi5	ANcr1	0	0
832	191797	4822.77	10438.6	10049.5	531.765	91.137	138.409	Hi5	unknow	0	0
833	191797	5085.43	10627.5	10125.1	535.245	97.433	141.547	Hi5	unknow	0	0
834	191797	5016.12	10443.4	10101.9	534.07	95.866	138.225	Hi5	unknow	0	0
835	191797	4794.5	10684.7	9435.17	497.327	87.55	145.567	Hi5	ANcr1	0	0
836	191797	4972.57	10635.1	9852.48	520.642	93.509	142.808	Hi5	unknow	0	0
837	191797	5031.52	10624.1	9013.51	471.938	91.451	146.546	Hi5	SIM	0	0
838	191797	5133.14	10634.5	9039.55	473.047	93.884	146.64	Hi5	SIM	0	0
839	191797	5096.64	10595.1	8107.85	421.392	87.669	149.874	Hi5	ICe	0	0
840	191797	5013.69	10668.2	8100.68	421.289	85.901	151.127	Hi5	ICe	0	0
841	191797	5099.44	10671.4	8021.2	416.565	87.192	151.506	Hi5	ICe	0	0
842	191797	5124.12	10769.4	8060.85	418.773	88.129	153.08	Hi5	ICe	0	0
843	191797	5999.99	10743.4	9722.74	509.687	116.538	145.179	Hi5	ANcr2	0	0
844	191797	5828.55	10673.6	9516.84	498.29	111.732	144.977	Hi5	ANcr2	0	0
845	191797	6120.86	10694	8038.6	414.347	109.212	152.065	Hi5	ICe	0	0
846	191797	6045.35	10647	8104.15	418.192	108.109	151.039	Hi5	ICe	0	0
847	191797	6058.81	10601.6	8107.69	418.299	108.391	150.242	Hi5	ICe	0	0
848	191797	5828.19	10554.5	7995.8	412.733	102.535	149.855	Hi5	ICe	0	0
849	191797	5766.7	10614.5	8050.26	416.033	101.713	150.679	Hi5	ICe	0	0
850	191797	5766.72	10612	7980.81	412.131	101.155	150.873	Hi5	ICe	0	0
851	191797	5766.39	10662.7	8021.44	414.457	101.52	151.601	Hi5	ICe	0	0
852	191797	5730.75	10572.5	7991.18	412.801	100.434	150.162	Hi5	ICe	0	0
853	191797	5809.28	10421.6	8001.77	413.034	102.061	147.566	Hi5	ICe	0	0
854	191797	5900.05	10672.4	7927.94	408.782	103.607	152.075	Hi5	ICe	0	0
855	191797	5952.39	10757.2	7953.97	410.165	105.001	153.429	Hi5	ICe	0	0
856	191797	5990.83	10673.4	7849.2	404.07	104.859	152.312	Hi5	ICe	0	0
857	191797	6000.58	10467.8	9935.24	521.746	117.833	138.906	Hi5	unknow	0	0
858	191797	6094.95	10572.3	9928.15	520.998	119.864	140.886	Hi5	ANcr2	0	0
859	191797	5877.49	10563.4	9947.57	522.924	114.985	140.72	Hi5	unknow	0	0
860	191797	5853.66	10513	9956.57	523.493	114.523	139.735	Hi5	unknow	0	0
861	191797	5777.83	10463.5	9984.9	525.307	112.951	138.712	Hi5	unknow	0	0
862	191797	6825.9	10656.1	4413.7	221.784	96.61	160.534	Hi5	ccb	0	0
863	191797	6786.7	10598.4	4440.91	222.95	95.704	159.468	Hi5	ccb	0	0
864	191797	8427.42	8731.73	9195.77	469.647	166.255	109.385	Hi5	PRM	0	0
865	191797	7346.61	8662.2	8655.95	442.677	139.871	111.687	Hi5	ANcr1	0	0
866	191797	7286.52	8721.15	8672.88	443.75	138.742	112.745	Hi5	ANcr1	0	0
867	191797	7437.18	8778.84	8721.5	445.797	142.279	113.544	Hi5	ANcr1	0	0
868	191797	7229.79	8601.53	8632.1	441.868	137.213	110.691	Hi5	ANcr1	0	0
869	191797	7534.22	8898.75	10341	537.981	154.414	106.46	Hi5	unknow	0	0
870	191797	7634.23	8986.33	10344.3	537.831	156.611	107.982	Hi5	unknow	0	0
871	191797	4807.34	10745.9	9286.88	488.694	87.286	147.355	Hi5	ANcr1	0	0
872	191797	4707.66	10758.2	9270.12	488.098	84.917	147.627	Hi5	ANcr1	0	0
873	191797	4808.26	10652.1	9248.9	486.387	87.247	145.829	Hi5	ANcr1	0	0
874	191797	4860.29	10669.7	9265.56	487.181	88.493	146.085	Hi5	ANcr1	0	0
875	191797	6873.23	10770.7	3151.74	149.13	92.916	155.748	Hi5	MOs5	1	0
876	191797	6863.37	10677.1	3223.25	153.526	93.143	154.666	Hi5	MOp5	1	0
877	191797	6839.48	10489.5	4207.43	211.239	97.511	157.455	Hi5	scwm	0	0
878	191797	6813.65	10440.3	4229.15	212.224	96.912	156.607	Hi5	MOp6b	0	0
879	191797	6957.76	10369.3	4225.72	212.775	100.164	155.909	Hi5	scwm	0	0
880	191797	7079.17	10698.2	7450.97	379.399	123.665	153.583	Hi5	ICe	0	0
881	191797	7079.35	10625.9	7423.65	377.868	123.356	152.475	Hi5	ICe	0	0
882	191797	7121.32	10751.5	7565.07	385.619	125.767	154.059	Hi5	ICe	0	0
883	191797	6907.54	10553	9032.16	465.88	132.631	145.349	Hi5	arb	0	0
884	191797	6907.85	10480.7	9002.76	464.168	132.485	144.169	Hi5	arb	0	0
885	191797	6947.93	10606.3	9141.25	471.904	134.193	145.789	Hi5	arb	0	0
886	191797	7085.03	10569.2	8932.99	459.676	135.63	146.071	Hi5	arb	0	0
887	191797	7021.54	10595.1	8967.39	461.855	134.525	146.399	Hi5	arb	0	0
888	191797	6997.03	10574.2	8984.05	462.858	134.146	145.948	Hi5	arb	0	0
889	191797	7074.66	10620.9	8896.64	457.768	135.137	147.157	Hi5	arb	0	0
890	191797	7107.07	10599.8	8882.67	456.853	135.733	146.828	Hi5	arb	0	0
891	191797	7128.41	10580.2	8851.5	455.042	135.988	146.593	Hi5	arb	0	0
892	191797	6886.6	10653	7926.45	405.942	124.281	151.29	Hi5	ICe	0	0
893	191797	6779.63	10757.9	7967.02	408.557	122.43	153.019	Hi5	ICe	0	0
894	191797	8501.81	10790	9957.8	512.262	172.174	142.814	Hi5	PRM	0	0
895	191797	8441.49	10697.7	9869.92	507.528	170.295	141.959	Hi5	PRM	0	0
896	191797	8351.43	10555.6	9806.74	504.35	168.054	139.965	Hi5	PRM	0	0
897	191797	8345.07	10633.8	7261.43	367.029	147.77	153.211	Hi5	MRN	1	0
898	191797	14720.9	10696.9	4164.7	197.168	260.202	150.66	Hi5	SI	0	0
899	191797	8448.24	10485.9	4408.74	227.969	130.407	162.549	Hi5	CP	0	0
900	191797	8383.48	10366.4	4447.07	229.387	128.972	160.455	Hi5	CP	0	0
901	191797	8571.1	10454.7	4384.16	227.129	133.027	162.254	Hi5	CP	0	0
902	191797	14766.2	10666.5	3643.65	167.545	258.847	149.4	Hi5	SI	0	0
903	191797	14749.7	10772.2	3711.01	171.623	258.845	151.258	Hi5	ACB	0	0
904	191797	14725.2	10708.2	3824.71	178.148	258.558	150.448	Hi5	ACB	0	0
905	191797	14824.2	10774.7	3795.87	176.176	260.803	151.27	Hi5	ACB	0	0
906	191797	14800.6	10505.9	5525.74	268.86	273.715	148.923	Hi5	MEA	0	0
907	191797	14762.2	10494.1	5602.94	273.094	273.66	148.773	Hi5	MEA	0	0
908	191797	5545.06	10622.1	8042.62	416.328	96.908	150.785	Hi5	ICe	0	0
909	191797	5398.7	10535.7	7996.79	414.183	93.314	149.404	Hi5	ICe	0	0
910	191797	5294.08	10556.1	7980.05	413.587	90.954	149.758	Hi5	ICe	0	0
911	191797	5409.71	10565.4	8057.14	417.548	94.045	149.709	Hi5	ICe	0	0
912	191797	5299.68	10702.4	8119.49	421.468	92.277	151.802	Hi5	ICe	0	0
913	191797	5426.77	10705.3	8122.01	421.207	95.045	151.895	Hi5	ICe	0	0
914	191797	5344.68	10772.8	8116.41	421.207	93.302	153.05	Hi5	ICe	0	0
915	191797	5414.45	10641.3	8199.38	425.495	95.276	150.482	Hi5	MB	0	0
916	191797	5421.79	10761.4	7802.94	403.239	92.526	153.711	Hi5	ICe	0	0
917	191797	5474.46	10655	7845.07	405.412	93.876	151.869	Hi5	ICe	0	0
918	191797	5474.13	10653.4	5825.84	291.06	72.519	155.303	Hi5	CA1	1	0
919	191797	5430.9	10691.6	6374.53	322.322	77.515	155.822	Hi5	CA1	1	0
920	191797	5528.46	10586.6	6287.6	317.234	78.281	154.439	Hi5	CA1	1	0
921	191797	12786.4	10565.4	3425.58	162.217	216.032	149.998	Hi5	CP	0	0
922	191797	12720.1	10669.6	3399.63	161.043	214.848	151.682	Hi5	CP	0	0
923	191797	12852.8	10551.6	4308.6	213.189	221.181	154.221	Hi5	act	0	0
924	191797	12921.6	10425.9	4335.68	214.085	222.489	152.006	Hi5	act	0	0
925	191797	12709.1	10630.8	4287.2	212.855	218.218	156.008	Hi5	CP	0	0
926	191797	12707.1	10692.4	8191.08	410.286	245.746	145.872	Hi5	PSV	1	0
927	191797	12952.7	10518.8	10269.8	518.958	271.442	129.629	Hi5	unknow	1	0
928	191797	12881.7	10458.9	2848.34	124.634	218.337	142.936	Hi5	PIR	0	0
929	191797	12625.7	10459.1	3148.93	144.656	212.527	146.049	Hi5	PIR	0	0
930	191797	12722	10623.6	3154.49	145.121	214.77	148.791	Hi5	PIR	0	0
931	191797	5751.87	10565.5	9121.6	475.412	108.276	145.09	Hi5	ANcr1	0	0
932	191797	5821.96	10532.5	9120.11	475.04	109.838	144.504	Hi5	ANcr1	0	0
933	191797	5737.49	10599.1	9131.46	476.064	107.989	145.648	Hi5	ANcr1	0	0
934	191797	5761.85	10647.2	9160.23	477.681	108.643	146.373	Hi5	ANcr1	0	0
935	191797	5794.48	10618.5	9151.65	477.039	109.343	145.901	Hi5	ANcr1	0	0
936	191797	5871.43	10617.5	9168.69	477.735	111.134	145.802	Hi5	ANcr1	0	0
937	191797	5786.85	10643.8	8662.38	449.724	106.415	148.81	Hi5	SIM	0	0
938	191797	12777.5	10682.7	3101.48	141.65	216.08	149.254	Hi5	PIR	0	0
939	191797	12733.4	10720.6	3089.92	141.088	215.24	149.845	Hi5	PIR	0	0
940	191797	12669	10681.6	3143.81	144.693	213.781	149.751	Hi5	PIR	0	0
941	191797	12743	10679.8	3152.85	145.073	215.301	149.712	Hi5	PIR	0	0
942	191797	12782.7	10647.8	3109.62	142.096	216.117	148.727	Hi5	PIR	0	0
943	191797	6834.82	10536.3	3333.76	160.219	93.213	153.051	Hi5	MOp5	1	0
944	191797	6936.74	10684.2	7274.39	369.896	118.644	154.019	Hi5	MB	0	0
945	191797	6934.72	10590.2	10420.9	544.123	141.203	138.417	Hi5	unknow	0	0
946	191797	5703.63	10693.3	7948.97	410.597	99.629	152.335	Hi5	ICe	0	0
947	191797	5737.94	10668.9	7981.26	412.292	100.597	151.834	Hi5	ICe	0	0
948	191797	5582.22	10784.6	8012.77	414.649	97.635	153.669	Hi5	ICe	0	0
949	191797	13318.4	10599.3	3904.97	188.895	228.476	152.059	Hi5	CP	0	0
950	191797	13406.8	10505.7	3846.46	184.963	229.779	150.08	Hi5	CP	0	0
951	191797	13347.7	10493.6	3220.24	147.242	227.563	146.49	Hi5	PIR	0	0
952	191797	13379.8	10499.1	3208.41	146.411	228.267	146.46	Hi5	PIR	0	0
953	191797	13083.7	10478.8	3403.33	159.562	221.953	147.914	Hi5	EPd	0	0
954	191797	13462	10727	3672.42	174.914	230.809	153.005	Hi5	CP	0	0
955	191797	13433.2	10738.1	3831.38	184.366	230.841	153.788	Hi5	CP	0	0
956	191797	13368.6	10653.9	3769.08	180.9	229.028	152.365	Hi5	CP	0	0
957	191797	13377.4	10694	3447.57	161.628	228.525	151.498	Hi5	OLF	0	0
958	191797	13423.5	10764.2	3336.38	154.689	229.599	151.927	Hi5	PIR	0	0
959	191797	10425.9	10532.1	2994.7	139.867	169.046	149.157	Hi5	ORBl5	0	0
960	191797	10328.2	10608.9	2994.05	140.187	167.183	150.563	Hi5	ORBl5	0	0
961	191797	10588.3	10614.9	3740.91	190.64	174.021	160.27	Hi5	CP	0	0
962	191797	4307.38	10552.3	9151.69	482.58	75.478	144.196	Hi5	ANcr1	0	0
963	191797	4573	10723.1	8240.56	430.516	77.242	151.266	Hi5	SIM	0	0
964	191797	4418.57	10757.1	8299.52	434.331	74.208	151.508	Hi5	SIM	0	0
965	191797	4441.98	10698.9	8207.69	429.091	74.123	150.909	Hi5	SIM	0	0
966	191797	4514.63	10724.5	8181	427.38	75.592	151.514	Hi5	MB	0	0
967	191797	5657.31	10743.1	8832.36	459.66	104.59	149.786	Hi5	SIM	0	0
968	191797	5694.71	10721.5	8828.19	459.27	105.39	149.428	Hi5	SIM	0	0
969	191797	5716.78	10645.7	8793.26	457.155	105.664	148.243	Hi5	SIM	0	0
970	191797	5748.81	10582.8	8739.5	453.996	106.034	147.365	Hi5	SIM	0	0
971	191797	5612.34	10668	8715.43	453.254	102.918	148.973	Hi5	SIM	0	0
972	191797	5623.42	10658	8737.78	454.43	103.289	148.7	Hi5	SIM	0	0
973	191797	5688.52	10711.1	8668.63	450.497	104.331	149.968	Hi5	CUL4, 5	0	0
974	191797	5619.34	10701.2	8694.69	452.142	102.963	149.658	Hi5	SIM	0	0
975	191797	5586.41	10747.4	8687.45	451.924	102.215	150.502	Hi5	SIM	0	0
976	191797	5641.56	10647	8750.3	455.042	103.758	148.451	Hi5	SIM	0	0
977	191797	5661.44	10638.2	8747.44	454.806	104.177	148.312	Hi5	SIM	0	0
978	191797	5692.69	10617.2	8722.1	453.277	104.707	148.054	Hi5	SIM	0	0
979	191797	4330.06	10621.3	9174.53	483.863	76.024	145.371	Hi5	ANcr1	0	0
980	191797	4217.65	10620.7	9159.06	483.407	73.4	145.344	Hi5	ANcr1	0	0
981	191797	4204.63	10532.9	9132.41	481.858	73.075	143.844	Hi5	ANcr1	0	0
982	191797	4543.02	10672.4	8907.88	467.929	79.883	147.573	Hi5	SIM	0	0
983	191797	4541.6	10637	8888.23	466.792	79.786	147.01	Hi5	SIM	0	0
984	191797	4523.11	10632.5	8877.84	466.275	79.328	146.955	Hi5	SIM	0	0
985	191797	4500.15	10619.2	8851.08	464.846	78.704	146.798	Hi5	SIM	0	0
986	191797	4542.32	10701.2	8925.93	468.978	79.924	148.02	Hi5	SIM	0	0
987	191797	4610.85	10701.6	8947.98	469.949	81.562	147.995	Hi5	SIM	0	0
988	191797	4633.99	10813	9007.24	473.317	82.243	149.782	Hi5	SIM	0	0
989	191797	11133.5	10506.6	3923.87	199.41	184.837	158.38	Hi5	CP	0	0
990	191797	11162.6	10382.4	4029.69	205.017	185.415	156.845	Hi5	CP	0	0
991	191797	10892.5	10726.7	2969.7	137.54	178.508	151.478	Hi5	ORBl5	0	0
992	191797	11087.4	10606.1	3026.65	140.766	182.221	149.903	Hi5	ORBl5	0	0
993	191797	11074.1	10641.4	2979.85	137.61	181.988	149.88	Hi5	ORBl5	0	0
994	191797	10981.4	10661.8	3006.06	139.726	180.196	150.744	Hi5	ORBl5	0	0
995	191797	11105.5	10705.5	3032.29	141.36	182.698	151.641	Hi5	ORBl5	0	0
996	191797	11131.5	10747.6	3025.57	140.924	183.258	152.22	Hi5	ORBl5	0	0
997	191797	11222.8	10750	3021.54	140.413	185.052	152.044	Hi5	ORBl2/3	0	0
998	191797	15910.7	10625.9	4500.46	211.329	289.081	147.838	Hi5	OT	0	0
999	191797	15880.1	10638.7	4583.27	215.929	289.049	148.173	Hi5	OT	0	0
1000	191797	15988.5	10673.7	4502.66	211.231	290.994	148.514	Hi5	OT	0	0
1001	191797	15843.8	10464.8	3971.76	182.206	284.02	144.607	Hi5	OT	0	0
1002	191797	15772.1	10556.3	3690.53	166.328	281.718	145.61	Hi5	OT	0	0
1003	191797	16345.9	10595.9	4207.47	193.97	297.142	146.384	Hi5	OT	0	0
1004	191797	16263.6	10589.7	4152.67	191.172	294.886	146.333	Hi5	OT	0	0
1005	191797	16313.6	10473	4313.14	199.863	296.794	144.512	Hi5	OT	0	0
1006	191797	16339.8	10554.5	3823.69	172.188	295.283	144.936	Hi5	unknow	0	0
1007	191797	16097.5	10557.3	4436.25	207.259	292.774	146.362	Hi5	OT	0	0
1008	191797	16199.2	10569	4404.22	205.215	294.932	146.379	Hi5	OT	0	0
1009	191797	16139.8	10646.5	4463.73	208.654	294.152	147.803	Hi5	OT	0	0
1010	191797	12644.3	10459.4	3790.95	184.991	213.964	151.356	Hi5	CP	1	0
1011	191797	12570.6	10586.1	4334.31	215.892	215.443	155.961	Hi5	CP	0	0
1012	191797	10981.6	10565.3	7930.8	399.252	207.393	147.189	Hi5	PSV	1	0
1013	191797	12599.9	10393.6	3163.7	145.535	211.886	145.1	Hi5	PIR	0	0
1014	191797	12401.9	10505.5	2732.2	117.954	208.657	142.951	Hi5	AON	0	0
1015	191797	12557.6	10642.5	3040.03	138.102	211.544	148.243	Hi5	PIR	0	0
1016	191797	12573.6	10588.2	3130.96	143.907	211.676	148.159	Hi5	PIR	0	0
1017	191797	12695.9	10550.4	3166.89	145.841	214.1	147.682	Hi5	PIR	0	0
1018	191797	14188.2	10435.6	4144.37	198.073	247.877	147.485	Hi5	ACB	0	0
1019	191797	14131	10510.9	4179.43	200.338	247.104	148.937	Hi5	ACB	0	0
1020	191797	14231.7	10530.7	3438	157.506	246.529	147.539	Hi5	PIR	0	0
1021	191797	14131.5	10490.5	3443.1	158.143	244.26	147.032	Hi5	PIR	0	0
1022	191797	14126.8	10462.6	3435.53	157.67	244.105	146.529	Hi5	PIR	0	0
1023	191797	12583.7	10702.6	4344.31	216.584	216.048	157.783	Hi5	act	0	0
1024	191797	15525.9	10547.6	3485.09	155.164	275.829	145.298	Hi5	unknow	0	0
1025	191797	15429.3	10695.7	3833.07	175.886	274.48	148.843	Hi5	OT	0	0
1026	191797	14017.9	10623.7	3934.14	187.346	243.391	150.67	Hi5	ACB	0	0
1027	191797	14071.4	10587	3879.61	183.961	244.177	149.875	Hi5	ACB	0	0
1028	191797	14009.7	10519.3	3841.47	181.966	242.517	148.832	Hi5	ACB	0	0
1029	191797	14008.4	10482.9	3837.3	181.679	242.385	148.223	Hi5	ACB	0	0
1030	191797	14064.1	10483.2	3803.15	179.469	243.457	148.067	Hi5	ACB	0	0
1031	191797	14060.3	10470.5	3802.06	179.404	243.342	147.862	Hi5	ACB	0	0
1032	191797	14076.9	10472.3	3804.62	179.48	243.714	147.863	Hi5	ACB	0	0
1033	191797	14085.6	10414.2	3738.97	175.563	243.561	146.778	Hi5	ACB	0	0
1034	191797	15467.6	10716.1	4997.45	239.01	284.172	150.646	Hi5	NLOT1	1	1
1035	191797	15480.3	10598.6	3764.88	171.705	275.251	147.013	Hi5	OT	0	0
1036	191797	15556.4	10596.6	3832.53	175.317	277.18	146.991	Hi5	OT	0	0
1037	191797	15546.1	10663.2	3774.15	172.052	276.912	147.983	Hi5	OT	0	0
1038	191797	3199.83	10587.1	6686.22	345.593	34.499	149.562	Hi5	VISp4	1	0
1039	191797	7915.29	10468.8	2705.37	121.822	114.025	147.147	Hi5	MOs5	1	0
1040	191797	7912.1	10513.1	4322.4	222.022	119.917	161.703	Hi5	CP	0	0
1041	191797	7930.05	10450.1	4367.21	224.197	120.101	160.759	Hi5	CP	0	0
1042	191797	7917.13	10417.6	4380.67	224.767	119.789	160.197	Hi5	CP	0	0
1043	191797	7955.84	10410	4418.51	226.706	120.384	160.197	Hi5	CP	0	0
1044	191797	7797.59	10375.7	4438.37	227.076	117.057	159.199	Hi5	CP	0	0
1045	191797	7759.71	10567.8	4380.15	224.307	116.46	162.215	Hi5	CP	0	0
1046	191797	7936.42	10573.1	4286.05	220.397	120.55	162.714	Hi5	CP	0	0
1047	191797	7848.06	10432.1	4359.85	223.527	118.471	160.223	Hi5	CP	0	0
1048	191797	7852.74	10456.7	4406.64	225.824	118.305	160.676	Hi5	CP	0	0
1049	191797	8001.96	10651.7	4264.97	219.71	121.941	164.169	Hi5	CP	0	0
1050	191797	7934.27	10718	4324.64	222.466	120.238	165.153	Hi5	CP	0	0
1051	191797	8039.8	10674.6	4334.37	223.282	122.371	164.731	Hi5	CP	0	0
1052	191797	7945.59	10668.2	4239.35	218.236	120.892	164.236	Hi5	CP	0	0
1053	191797	8163.29	10554.8	4267.38	220.263	125.268	162.972	Hi5	CP	0	0
1054	191797	8159.04	10679.5	4268.98	220.537	125.109	165.048	Hi5	CP	0	0
1055	191797	7838.47	10627.3	4289.08	220.237	118.494	163.339	Hi5	CP	0	0
1056	191797	7814.41	10657.7	4271.64	219.312	118.061	163.742	Hi5	CP	0	0
1057	191797	3113.26	10714.9	8871.24	471.166	46.998	147.442	Hi5	unknow	0	0
1058	191797	3164.55	10596.9	8837.24	469.005	48.101	145.494	Hi5	unknow	0	0
1059	191797	3169.01	10593.8	8888.46	471.856	48.388	145.227	Hi5	unknow	0	0
1060	191797	3211.76	10604.5	8958.87	475.675	49.62	145.158	Hi5	unknow	0	0
1061	191797	3230.29	10605.7	8976.44	476.602	50.108	145.118	Hi5	unknow	0	0
1062	191797	3247.03	10636.1	8998.71	477.823	50.557	145.589	Hi5	unknow	0	0
1063	191797	3284.04	10659.4	9068.56	481.624	51.633	145.779	Hi5	unknow	0	0
1064	191797	3310.47	10629.8	9076.3	481.947	52.285	145.228	Hi5	unknow	0	0
1065	191797	3268.39	10593	9028.44	479.375	51.171	144.714	Hi5	unknow	0	0
1066	191797	7852.63	10668.8	3812.46	194.189	119.756	161.349	Hi5	CP	0	0
1067	191797	7819.86	10763.2	3933.69	201.409	119.058	163.948	Hi5	CP	0	0
1068	191797	8002.95	10596.8	8548.18	435.917	151.477	147.573	Hi5	arb	0	0
1069	191797	8044.16	10722.9	8604.94	438.883	152.607	149.685	Hi5	arb	0	0
1070	191797	7921.57	10534	3755	190.626	121.144	158.596	Hi5	CP	0	0
1071	191797	7872	10476.7	9688.31	499.45	157.284	139.821	Hi5	PRM	0	0
1072	191797	8035.04	10483.2	9718.57	500.538	160.887	139.614	Hi5	PRM	0	0
1073	191797	8127.56	10511.9	9748.42	501.879	163.002	139.845	Hi5	PRM	0	0
1074	191797	7996.57	10384.8	9689.69	499.07	159.967	138.008	Hi5	PRM	0	0
1075	191797	7960.01	10355.1	9670.47	498.114	159.097	137.617	Hi5	PRM	0	0
1076	191797	8095	10552.2	9752.88	502.24	162.322	140.592	Hi5	PRM	0	0
1077	191797	9875.8	10402.6	3418.81	170.079	159.212	153.568	Hi5	CP	0	0
1078	191797	9884.79	10457.7	3492.67	175.303	159.653	155.584	Hi5	CP	0	0
1079	191797	9905.96	10492.6	3529.29	177.88	160.193	156.694	Hi5	CP	0	0
1080	191797	7351.53	10648.3	4360.98	221.707	108.022	162.201	Hi5	CP	0	0
1081	191797	7395.9	10539	4395.19	223.527	108.858	160.588	Hi5	CP	0	0
1082	191797	7404.79	10656.2	4350.77	221.452	109.182	162.502	Hi5	CP	0	0
1083	191797	7391.06	10701	4250.94	216.435	109.292	163.036	Hi5	CP	0	0
1084	191797	7460.97	10684.5	4315.01	219.962	110.507	163.117	Hi5	CP	0	0
1085	191797	7343.32	10487.1	4386.02	222.826	107.837	159.551	Hi5	CP	0	0
1086	191797	7325.31	10496.9	4331.82	220.066	107.697	159.583	Hi5	CP	0	0
1087	191797	7461.99	10587.5	10454	543.822	153.085	137.585	Hi5	unknow	0	0
1088	191797	7446.93	10597.7	10398.9	540.928	152.477	138.059	Hi5	unknow	0	0
1089	191797	7595.41	10483.9	6981.53	352.628	128.871	152.63	Hi5	SCig	0	0
1090	191797	7548.66	10433.5	7084.16	358.323	129.231	151.094	Hi5	MB	0	0
1091	191797	12408.6	10623.4	3132.98	144.553	208.354	149.015	Hi5	EPd	0	0
1092	191797	12416.2	10538	3131.72	144.253	208.38	147.535	Hi5	PIR	0	0
1093	191797	12216.7	10590.1	3130.92	144.849	204.424	148.742	Hi5	OLF	0	0
1094	191797	12331	10563.2	3131.75	144.537	206.689	148.099	Hi5	OLF	0	0
1095	191797	11834.8	10586.1	3072.59	141.925	196.861	148.751	Hi5	PIR	0	0
1096	191797	11842.1	10503	3071.23	141.605	196.898	147.307	Hi5	AIv2/3	0	0
1097	191797	11642	10550.6	3070.62	142.211	193.022	148.495	Hi5	AIv2/3	0	0
1098	191797	11752.2	10526.9	3069.15	141.759	195.157	147.861	Hi5	AIv2/3	0	0
1099	191797	11692.6	10642.9	3002.98	137.674	194.16	149.148	Hi5	PIR	0	0
1100	191797	11752.3	10542.7	3066.89	141.643	195.18	148.102	Hi5	AIv2/3	0	0
1101	191797	3683.3	10479.8	9623.63	511.259	62.904	140.857	Hi5	unknow	0	0
1102	191797	3713.48	10587.9	9661.58	513.409	63.664	142.711	Hi5	unknow	0	0
1103	191797	13736.3	10599.8	3058.82	136.117	236.358	146.616	Hi5	PIR	0	0
1104	191797	13619.3	10647.2	3066.35	136.993	233.908	147.584	Hi5	PIR	0	0
1105	191797	13785.4	10709.2	3793.45	180.502	237.99	152.371	Hi5	ACB	0	0
1106	191797	13775	10584.2	3736.05	177.03	237.261	150.192	Hi5	ACB	0	0
1107	191797	13928	10491.2	4066.07	194.98	241.921	148.907	Hi5	ACB	0	0
1108	191797	9711.85	10525.6	4498.25	234.748	156.256	163.33	Hi5	PAL	0	0
1109	191797	9659.56	10404.7	4486.98	233.881	155.082	161.514	Hi5	PAL	0	0
1110	191797	9818.36	10538	3100.15	148.234	157.136	151.245	Hi5	AIv6a	0	0
1111	191797	9772.59	10588.1	3096.25	148.12	156.25	152.057	Hi5	AIv6a	0	0
1112	191797	9820.75	10490.5	3926.22	203.487	159.19	161.301	Hi5	CP	0	0
1113	191797	15065.8	10515.2	3327.64	147.587	265.312	145.057	Hi5	unknow	0	0
1114	191797	13571.3	10677.8	3755.41	179.223	233.254	152.235	Hi5	CP	0	0
1115	191797	13654.6	10721.7	3776.22	180.122	235.189	152.828	Hi5	ACB	0	0
1116	191797	13605.3	10694.4	3306.87	152.101	233.337	150.35	Hi5	PIR	0	0
1117	191797	13618.6	10770.1	3284.64	150.779	233.793	151.472	Hi5	PIR	0	0
1118	191797	4308.91	10425.9	8530.08	447.221	72.789	144.361	Hi5	SIM	0	0
1119	191797	4368.84	10435.5	8538.52	447.494	74.187	144.554	Hi5	SIM	0	0
1120	191797	4422.14	10453.2	8566.28	448.898	75.549	144.82	Hi5	SIM	0	0
1121	191797	4430.91	10486.6	8595.36	450.546	75.922	145.322	Hi5	SIM	0	0
1122	191797	4412.17	10543.9	8642.77	453.359	75.77	146.161	Hi5	SIM	0	0
1123	191797	4458.87	10557.8	8714.18	457.231	77.174	146.183	Hi5	arb	0	0
1124	191797	4481.67	10448.2	8581.76	449.556	76.968	144.726	Hi5	SIM	0	0
1125	191797	4510.86	10369.8	8536.46	446.831	77.32	143.51	Hi5	SIM	0	0
1126	191797	4486.42	10520.5	8687.64	455.59	77.659	145.637	Hi5	arb	0	0
1127	191797	4541.69	10492.3	8687.74	455.356	78.896	145.178	Hi5	arb	0	0
1128	191797	6061.4	10657.8	8845	458.83	113.491	148.226	Hi5	SIM	0	0
1129	191797	6135.61	10679.3	8850.17	458.875	115.121	148.585	Hi5	SIM	0	0
1130	191797	6361.06	10389.6	9104.35	471.98	121.605	141.999	Hi5	ANcr1	0	0
1131	191797	6192.95	10385.4	9104	472.602	117.962	141.92	Hi5	ANcr1	0	0
1132	191797	6220.3	10439.5	9130.13	474.038	118.681	142.773	Hi5	ANcr1	0	0
1133	191797	6192.5	10554	9176.79	476.919	118.274	144.624	Hi5	ANcr1	0	0
1134	191797	6394.4	10490.1	9131.1	473.459	122.429	143.704	Hi5	ANcr1	0	0
1135	191797	6399.71	10560.9	9156.33	474.936	122.652	144.871	Hi5	ANcr1	0	0
1136	191797	6414.85	10524.6	9144.07	474.147	122.928	144.27	Hi5	ANcr1	0	0
1137	191797	6354.91	10511.6	9146.21	474.495	121.654	144.016	Hi5	ANcr1	0	0
1138	191797	6255.42	10548.1	9174.22	476.52	119.635	144.532	Hi5	ANcr1	0	0
1139	191797	6188.2	10619.9	9203.79	478.542	118.287	145.688	Hi5	ANcr1	0	0
1140	191797	6211.33	10697.1	9238.42	480.505	118.927	146.924	Hi5	ANcr1	0	0
1141	191797	6034.2	10536.8	9158.54	476.464	114.718	144.395	Hi5	ANcr1	0	0
1142	191797	9113.95	10475.6	4405.41	229.626	143.948	163.145	Hi5	CP	0	0
1143	191797	9145.88	10440.5	4402.71	229.466	144.608	162.592	Hi5	CP	0	0
1144	191797	9188.14	10511.5	4409.63	230.061	145.452	163.748	Hi5	CP	0	0
1145	191797	9210.25	10627.7	2996.94	141.527	144.393	151.51	Hi5	AId6a	0	0
1146	191797	9316.39	10695.2	3103.22	149.024	147.086	153.971	Hi5	scwm	0	0
1147	191797	9195.41	10444.5	10222.4	525.136	189.085	133.292	Hi5	unknow	0	0
1148	191797	9179.57	10363.1	10238.7	526.168	188.899	131.739	Hi5	unknow	0	0
1149	191797	9161.49	10458	10253.1	526.922	188.578	133.435	Hi5	unknow	0	0
1150	191797	9072.31	10457.3	10308.8	530.267	187.067	133.299	Hi5	unknow	0	0
1151	191797	9089.39	10538	10316.6	530.547	187.451	134.715	Hi5	unknow	0	0
1152	191797	9299.66	10367.8	10019.8	513.562	189.767	133.046	Hi5	unknow	0	0
1153	191797	9244.68	10461	10112.2	518.843	189.296	134.18	Hi5	unknow	0	0
1154	191797	9149.1	10657	3955.33	205.997	145.952	164.651	Hi5	CP	0	0
1155	191797	9041.08	10661.5	3962.75	206.327	143.794	164.724	Hi5	CP	0	0
1156	191797	9077.35	10560.7	4024.44	209.615	144.409	163.463	Hi5	CP	0	0
1157	191797	9154.53	10528.7	4051.35	211.131	145.89	163.128	Hi5	CP	0	0
1158	191797	9121.17	10712.4	4329.54	226.54	144.372	167.05	Hi5	CP	0	0
1159	191797	9029.28	10709.6	4349.89	227.341	142.412	166.948	Hi5	CP	0	0
1160	191797	9098.62	10634.3	4369.68	228.263	143.76	165.752	Hi5	CP	0	0
1161	191797	9283.03	10677.9	3587.32	182.73	148.255	160.812	Hi5	CP	0	0
1162	191797	9179.91	10781.1	3567.05	181.648	146.188	162.262	Hi5	CP	0	0
1163	191797	13026.1	10604.4	3200.44	147.17	221.022	148.526	Hi5	PIR	0	0
1164	191797	13032.8	10522.3	3232.55	149.035	220.991	147.382	Hi5	PIR	0	0
1165	191797	13075.2	10491.7	3205.34	147.117	221.845	146.588	Hi5	PIR	0	0
1166	191797	13068.4	10660.4	3183.21	146.047	222.024	149.296	Hi5	PIR	0	0
1167	191797	13036.4	10663.2	3196.57	147.003	221.345	149.488	Hi5	PIR	0	0
1168	191797	12950.6	10687.1	3172.15	145.74	219.617	149.775	Hi5	PIR	0	0
1169	191797	12975	10707.9	3114.76	142.02	220.231	149.599	Hi5	PIR	0	0
1170	191797	12960.5	10575.5	3165.3	145.057	219.634	147.796	Hi5	PIR	0	0
1171	191797	12907.9	10559.1	3180.43	146.144	218.494	147.702	Hi5	PIR	0	0
1172	191797	12903.3	10492.3	3190.21	146.647	218.276	146.648	Hi5	PIR	0	0
1173	191797	12905.9	10712.2	3116.91	142.358	218.789	149.761	Hi5	PIR	0	0
1174	191797	12912.7	10671.2	3125.18	142.796	218.849	149.128	Hi5	PIR	0	0
1175	191797	13087.6	10654	3398.08	159.581	222.369	150.86	Hi5	EPd	0	0
1176	191797	13112.6	10574	3413.54	160.295	222.741	149.575	Hi5	EPd	0	0
1177	191797	13131	10685.8	3392.43	159.129	223.328	151.306	Hi5	EPd	0	0
1178	191797	13058.5	10668.2	3378.15	158.464	221.782	150.993	Hi5	EPd	0	0
1179	191797	13098.4	10601.5	6047.27	300.35	239.324	154.526	Hi5	MEA	1	0
1180	191797	9477.85	10457.3	10146.9	520.071	194.52	133.457	Hi5	unknow	0	0
1181	191797	9443.05	10610.1	4446.03	232.383	150.695	165.157	Hi5	STR	0	0
1182	191797	9459.09	10704	4448.97	232.767	151.079	166.604	Hi5	st	0	0
1183	191797	9363.55	10659.8	3952.19	205.956	150.221	164.727	Hi5	CP	0	0
1184	191797	9594.58	10527.3	4326.97	226.278	154.101	163.882	Hi5	int	0	0
1185	191797	11487.2	10513.4	8145.82	409.479	219.326	144.744	Hi5	PSV	0	0
1186	191797	11295	10666.5	8091.9	406.987	214.815	147.88	Hi5	PSV	0	0
1187	191797	11387.7	10670.5	8168.47	410.712	217.223	147.479	Hi5	PSV	0	0
1188	191797	13644.4	10791.3	3215.73	146.432	234.474	151.29	Hi5	PIR	0	0
1189	191797	13669.2	10769.9	3279.22	150.264	234.883	151.381	Hi5	PIR	0	0
1190	191797	13692.3	10799.1	3270.84	149.699	235.447	151.797	Hi5	PIR	0	0
1191	191797	13711.4	10786.8	3287.16	150.626	235.815	151.684	Hi5	PIR	0	0
1192	191797	13608.2	10805.9	3262.93	149.514	233.663	151.932	Hi5	PIR	0	0
1193	191797	15270.1	10579.4	3764.02	172.416	270.41	147.089	Hi5	OT	0	0
1194	191797	15331.6	10602.3	3822.94	175.587	272.031	147.462	Hi5	OT	0	0
1195	191797	15258.8	10718.8	3794.33	174.334	270.531	149.448	Hi5	OT	0	0
1196	191797	15369.6	10640	3728.46	170.051	272.712	147.82	Hi5	OT	0	0
1197	191797	11368.4	10506	3045.79	141.112	187.608	147.946	Hi5	AIv2/3	0	0
1198	191797	11331.5	10442.8	3075.76	143.128	186.816	147.337	Hi5	AIv5	0	0
1199	191797	11466.6	10448.4	3044.75	140.633	189.458	146.767	Hi5	AIv2/3	0	0
1200	191797	11626.8	10568.2	3254.03	154.842	192.839	151.05	Hi5	OLF	0	0
1201	191797	11726.2	10506.1	3279.32	156.068	194.706	150.034	Hi5	CTXsp	0	0
1202	191797	14543.1	10578.2	5462.76	266.111	267.328	150.743	Hi5	MEA	0	0
1203	191797	14576.6	10531.7	5504.47	268.239	268.39	149.903	Hi5	MEA	0	0
1204	191797	14533	10608.4	5539.68	270.226	268.04	151.191	Hi5	MEA	0	0
1205	191797	14593.4	10641.7	5565.01	271.432	269.834	151.538	Hi5	MEA	0	0
1206	191797	14620.3	10715.3	5537.15	269.883	270.406	152.646	Hi5	MEA	0	0
1207	191797	14588.1	10503.5	5226.86	253.491	265.668	149.477	Hi5	MEA	0	0
1208	191797	14352.2	10527.5	3260.76	146.425	249.33	146.321	Hi5	PIR	0	0
1209	191797	14420.8	10449.6	3310.32	149.062	250.636	145.19	Hi5	PIR	0	0
1210	191797	14500.1	10511.1	3301.94	148.316	252.534	146.04	Hi5	OT	0	0
1211	191797	14543.5	10500.7	3305.51	148.349	253.479	145.806	Hi5	OT	0	0
1212	191797	14495.9	10475.6	3341.92	150.689	252.322	145.685	Hi5	OT	0	0
1213	191797	14560.2	10621	3303.7	148.284	254.095	147.786	Hi5	OT	0	0
1214	191797	14568.2	10665.2	3310.38	148.69	254.356	148.547	Hi5	OT	0	0
1215	191797	14487	10517.5	5762.39	282.261	269.126	149.679	Hi5	MEA	0	0
1216	191797	14384.2	10566.8	5697	278.977	266.16	150.792	Hi5	MEA	0	0
1217	191797	14412.9	10609.9	5659.44	276.9	266.566	151.422	Hi5	MEA	0	0
1218	191797	14413.1	10643.4	5666.5	277.275	266.762	151.936	Hi5	MEA	0	0
1219	191797	14567.5	10683.7	3507.01	160.42	254.256	149.76	Hi5	SI	0	0
1220	191797	14462.1	10628.2	3481.05	159.258	251.799	148.958	Hi5	SI	0	0
1221	191797	14547.6	10720.9	3467.79	158.23	253.872	150.271	Hi5	SI	0	0
1222	191797	14587.6	10629.2	3772.93	175.668	255.148	149.399	Hi5	ACB	0	0
1223	191797	14482.7	10578.3	3746.76	174.542	252.637	148.762	Hi5	ACB	0	0
1224	191797	14566.9	10670.8	3734.01	173.578	254.645	150.068	Hi5	ACB	0	0
1225	191797	14578.8	10626.4	3927.56	184.49	255.571	149.529	Hi5	ACB	0	0
1226	191797	14430.5	10547.7	3891.18	182.971	251.96	148.504	Hi5	ACB	0	0
1227	191797	14550.9	10477.4	3796.53	176.967	254.108	147.034	Hi5	ACB	0	0
1228	191797	14377.5	10612.5	3833.16	179.985	250.698	149.627	Hi5	ACB	0	0
1229	191797	14353.4	10670.9	3885.97	183.165	250.53	150.687	Hi5	ACB	0	0
1230	191797	14329.6	10482.4	3772.27	176.525	249.146	147.52	Hi5	ACB	0	0
1231	191797	14404.4	10507.5	4199.08	200.22	253.101	148.262	Hi5	ACB	0	0
1232	191797	14320.7	10586	4100.42	195.226	250.811	149.59	Hi5	ACB	0	0
1233	191797	14316.5	10459.2	4218.97	201.638	251.237	147.708	Hi5	ACB	0	0
1234	191797	9004.97	10491	3711.83	190.114	143.005	159.039	Hi5	CP	0	0
1235	191797	8964.95	10640.2	3940.85	204.847	142.304	164.106	Hi5	CP	0	0
1236	191797	8854.18	10590.4	10381.1	534.797	182.833	135.78	Hi5	unknow	0	0
1237	191797	8962.2	10545.2	10362.4	533.461	185.041	134.851	Hi5	unknow	0	0
1238	191797	8914.1	10475.7	4095.56	213.113	140.995	162.304	Hi5	CP	0	0
1239	191797	8839.92	10437.5	4223.47	219.761	139.105	162.124	Hi5	CP	0	0
1240	191797	8798.95	10434.5	4214.9	219.21	138.319	161.996	Hi5	CP	0	0
1241	191797	11184.9	10568.7	3411.34	166.966	184.624	154.17	Hi5	CP	0	0
1242	191797	11470.9	10673.7	4264.37	217.348	192.5	161.42	Hi5	CP	0	0
1243	191797	11478.9	10531.9	4307.7	219.247	192.493	159.149	Hi5	CP	0	0
1244	191797	11378.9	10589.6	4304.04	219.651	190.548	160.417	Hi5	CP	0	0
1245	191797	8238.26	10607.6	9792.65	503.932	165.547	141.176	Hi5	PRM	0	0
1246	191797	8440.94	10686.7	9869.38	507.509	170.289	141.76	Hi5	PRM	0	0
1247	191797	8150.09	10537.3	8497.17	432.802	154.06	146.597	Hi5	arb	0	0
1248	191797	8042.28	10428.2	10396.3	538.685	165.519	134.08	Hi5	unknow	0	0
1249	191797	8185.89	10494.7	8479.99	431.779	154.676	145.869	Hi5	arb	0	0
1250	191797	8297.36	10480.9	4260.87	220.256	128.05	162.029	Hi5	CP	0	0
1251	191797	8193.43	10593	4375.68	225.704	125.338	163.785	Hi5	CP	0	0
1252	191797	8186.5	10622	3408.25	168.975	125.224	156.34	Hi5	ccg	0	0
1253	191797	8260.86	10435.1	4371.26	225.492	126.823	161.337	Hi5	CP	0	0
1254	191797	8290.05	10489.9	4215.41	217.938	128.088	162.041	Hi5	CP	0	0
1255	191797	8664.68	10586.3	4204.49	218.734	135.623	164.353	Hi5	CP	0	0
1256	191797	8779.97	10572	4334.25	225.578	137.421	164.483	Hi5	CP	0	0
1257	191797	8649.91	10608.8	10208.8	526.088	177.308	137.332	Hi5	unknow	0	0
1258	191797	8716.74	10539.7	10234.5	527.337	178.942	135.799	Hi5	unknow	0	0
1259	191797	8658.41	10519.4	9916.15	509.569	175.344	137.904	Hi5	PRM	0	0
1260	191797	8734.68	10443.9	10032.6	516.065	177.915	135.366	Hi5	PRM	0	0
1261	191797	8563.99	10481	9846.31	505.91	172.848	137.955	Hi5	PRM	0	0
1262	191797	8644.57	10585.1	4369.33	226.902	134.525	164.511	Hi5	CP	0	0
1263	191797	8618.04	10547.3	4380.68	227.287	133.951	163.85	Hi5	CP	0	0
1264	191797	10191.4	10724.7	4296.75	224.464	166.708	165.921	Hi5	int	0	0
1265	191797	10200.9	10665.5	4402.39	229.765	166.814	164.832	Hi5	int	0	0
1266	191797	10172.4	10669.2	8282.31	417.799	192.566	148.34	Hi5	PSV	1	0
1267	191797	10416.5	10739.8	3988.54	206.725	171.194	164.81	Hi5	CP	0	0
1268	191797	10363.1	10665.2	3959.48	204.917	170.03	163.518	Hi5	CP	0	0
1269	191797	10296.6	10676.8	4014.81	208.406	168.77	164.208	Hi5	CP	0	0
1270	191797	10326.8	10520.7	3026.74	142.284	167.108	149.533	Hi5	ORBl5	0	0
1271	191797	6789.92	10705.6	7534.13	384.564	118.538	153.487	Hi5	ICe	0	0
1272	191797	6688.41	10767.2	7558.03	386.132	116.703	154.46	Hi5	ICe	0	0
1273	191797	8785.39	10659.2	3028.04	143.685	135.594	152.481	Hi5	MOs6a	0	0
1274	191797	8638.07	10615	10048.3	517.139	175.889	138.569	Hi5	PRM	0	0
1275	191797	6895.73	10752.6	4317.37	217.305	98.391	162.259	Hi5	ccb	0	0
1276	191797	6596.6	10713.6	7115.91	361.713	109.473	154.971	Hi5	SCig	0	0
1277	191797	6639.75	10502	10376.9	543.008	134.398	137.246	Hi5	unknow	0	0
1278	191797	6591.67	10588.3	10378.2	543.24	133.273	138.902	Hi5	unknow	0	0
1279	191797	6693.11	10657.6	10396.6	543.77	135.619	140.028	Hi5	unknow	0	0
1280	191797	6744.04	10560.8	10395.1	543.53	136.809	138.174	Hi5	unknow	0	0
1281	191797	6717.14	10497.3	7772.02	397.708	119.304	149.383	Hi5	ICe	0	0
1282	191797	6758.46	10692.2	10407.4	544.057	137.127	140.564	Hi5	unknow	0	0
1283	191797	6598.47	10704.9	8162.28	419.778	120.244	151.574	Hi5	CB	0	0
1284	191797	10689	10664	3535.19	177.141	175.509	158.56	Hi5	CP	0	0
1285	191797	10727	10453.9	3000.95	139.47	174.928	147.523	Hi5	ORBl5	0	0
1286	191797	10761.7	10341.1	3027.71	140.983	175.499	145.931	Hi5	AIv5	0	0
1287	191797	10820.1	10394.8	2985.6	138.032	176.68	146.163	Hi5	ORBl5	0	0
1288	191797	10636.3	10395.6	2962.3	136.829	173.023	146.108	Hi5	ORBl5	0	0
1289	191797	10723.9	10347.8	3024.84	140.888	174.76	146.059	Hi5	ORBl5	0	0
1290	191797	4084.87	10589.8	9733.82	516.451	72.468	142.525	Hi5	unknow	0	0
1291	191797	4139.15	10579.3	9708.59	514.882	73.609	142.427	Hi5	unknow	0	0
1292	191797	4192.28	10528.5	9686.64	513.451	74.773	141.582	Hi5	unknow	0	0
1293	191797	4343.09	10609.9	8717.06	457.898	74.584	147.008	Hi5	arb	0	0
1294	191797	3965.53	10485.5	9738.17	516.906	69.842	140.588	Hi5	unknow	0	0
1295	191797	4071.72	10671.3	9748.52	517.388	72.164	143.967	Hi5	unknow	0	0
1296	191797	4047.78	10580	9745.68	517.202	71.68	142.3	Hi5	unknow	0	0
1297	191797	4260.19	10582.1	6270.18	317.588	54.711	151.91	Hi5	fp	0	0
1298	191797	7478.33	10761.6	4280.29	218.375	110.978	164.393	Hi5	CP	0	0
1299	191797	4731.83	10462.6	5597.02	277.482	57.469	150.414	Hi5	SSp-tr6a	1	1
1300	191797	4729.76	10482.9	5602.3	277.78	57.469	150.749	Hi5	SSp-tr6a	1	1
1301	191797	4647.19	10672.5	8166.02	426.085	78.345	150.73	Hi5	MB	0	0
1302	191797	4148.74	10629.6	9160.09	483.733	71.821	145.45	Hi5	ANcr1	0	0
1303	191797	4146.94	10691.8	9172.16	484.484	71.774	146.531	Hi5	ANcr1	0	0
1304	191797	7169.52	10673.9	10035.1	522.147	144.398	141.741	Hi5	PRM	0	0
1305	191797	7131.9	10655.7	10017.1	521.318	143.48	141.527	Hi5	PRM	0	0
1306	191797	7094.88	10621.6	9997.31	520.391	142.575	141.021	Hi5	PRM	0	0
1307	191797	7198.37	10707.5	10048.5	522.751	145.087	142.273	Hi5	PRM	0	0
1308	191797	7287.09	10650.6	10056.7	522.864	147.107	141.08	Hi5	PRM	0	0
1309	191797	7309.67	10736	10082.8	524.163	147.703	142.514	Hi5	PRM	0	0
1310	191797	7088.86	10812	10038.8	522.627	142.563	144.384	Hi5	PRM	0	0
1311	191797	7249.08	10818.2	10086.9	524.586	146.355	144.091	Hi5	PRM	0	0
1312	191797	7006.04	10670.6	9979.08	519.745	140.486	142.105	Hi5	PRM	0	0
1313	191797	7274.99	10382.2	4430.59	224.68	106.262	157.631	Hi5	CP	0	0
1314	191797	7211.42	10641.5	9641.43	499.529	142.909	143.49	Hi5	arb	0	0
1315	191797	7157.1	10695.4	7179.71	364.269	122.137	154.746	Hi5	MB	0	0
1316	191797	7230.77	10395.9	4472.19	226.525	105.117	157.72	Hi5	CP	0	0
1317	191797	7194.61	10536.5	4041.93	204.241	105.608	158.79	Hi5	ccb	0	0
1318	191797	7263.33	10415.9	3990.66	201.594	107.151	156.675	Hi5	ccb	0	0
1319	191797	7133.22	10517.4	7523.31	383.198	125.554	150.273	Hi5	ICe	0	0
1320	191797	7097.56	10386.9	7615.73	388.265	125.749	147.784	Hi5	ICe	0	0
1321	191797	7191.1	10599.7	7649.14	389.998	128.057	151.175	Hi5	ICe	0	0
1322	191797	7018.99	10534	7622.32	388.85	124.189	150.275	Hi5	ICe	0	0
1323	191797	7190.07	10689.6	7760.46	396.149	129.098	152.293	Hi5	ICe	0	0
1324	191797	7303.84	10652.2	10461.1	544.757	149.596	138.957	Hi5	unknow	0	0
1325	191797	7376.26	10775.4	10471.6	544.926	151.2	141.096	Hi5	unknow	0	0
1326	191797	7193.31	10712.6	10462.7	545.229	147.123	140.21	Hi5	unknow	0	0
1327	191797	7203.65	10673.4	10459.1	545.031	147.353	139.485	Hi5	unknow	0	0
1328	191797	7210.74	10616.9	10457.1	544.937	147.524	138.436	Hi5	unknow	0	0
1329	191797	7197.26	10557.7	7048.96	356.928	121.377	153.187	Hi5	SCig	0	0
1330	191797	7136.85	10504.7	6937.04	350.81	118.653	152.917	Hi5	SCig	0	0
1331	191797	6323.77	10637.1	9973.09	522.531	125.23	141.819	Hi5	PRM	0	0
1332	191797	6395.31	10521.4	9979.23	522.561	126.972	139.565	Hi5	unknow	0	0
1333	191797	6242.87	10704.5	9958.99	522.102	123.267	143.195	Hi5	PRM	0	0
1334	191797	6522.48	10425.6	10002.5	523.294	130.023	137.583	Hi5	unknow	0	0
1335	191797	6543.33	10443.7	10035.5	525.02	130.643	137.761	Hi5	unknow	0	0
1336	191797	6524.6	10474.8	10036.6	525.16	130.206	138.356	Hi5	unknow	0	0
1337	191797	6514.98	10507.6	10091.5	528.206	130.237	138.726	Hi5	unknow	0	0
1338	191797	6405.2	10488.4	10202.5	534.668	128.289	137.929	Hi5	unknow	0	0
1339	191797	6301.16	10615.8	10212.8	535.633	125.886	140.353	Hi5	unknow	0	0
1340	191797	6353.58	10532.2	10216.4	535.621	127.152	138.728	Hi5	unknow	0	0
1341	191797	6402.8	10562.6	10177.5	533.331	128.071	139.442	Hi5	unknow	0	0
1342	191797	6341.62	10644.9	10184.6	533.958	126.657	141.001	Hi5	unknow	0	0
1343	191797	6428.26	10644.3	10112.5	529.708	128.283	141.265	Hi5	unknow	0	0
1344	191797	6452.03	10602.2	10127.9	530.443	128.926	140.385	Hi5	unknow	0	0
1345	191797	6447.35	10451.6	10188.5	533.746	129.203	137.268	Hi5	unknow	0	0
1346	191797	6464.23	10449.1	10175.6	532.979	129.527	137.267	Hi5	unknow	0	0
1347	191797	6371.12	10519.9	7841.31	402.426	112.678	149.733	Hi5	ICe	0	0
1348	191797	6473.79	10469.3	7806.69	400.194	114.494	148.961	Hi5	ICe	0	0
1349	191797	6409.9	10549.4	7814.63	400.863	113.271	150.29	Hi5	ICe	0	0
1350	191797	6498.9	10550.2	7742.45	396.634	114.473	150.47	Hi5	ICe	0	0
1351	191797	6527.15	10510.1	7757.48	397.368	115.184	149.755	Hi5	ICe	0	0
1352	191797	6517.31	10362.4	7817.32	400.595	115.449	147.135	Hi5	ICe	0	0
1353	191797	6427.73	10662.3	9172.66	475.836	123.289	146.65	Hi5	ANcr1	0	0
1354	191797	6473.53	10558	9111.94	472.112	123.974	145.055	Hi5	arb	0	0
1355	191797	6435.83	10505	10186.1	533.662	128.898	138.294	Hi5	unknow	0	0
1356	191797	6331.4	10419.8	10282.8	539.254	127.016	136.341	Hi5	unknow	0	0
1357	191797	6305.05	10484.1	10324.3	541.554	126.566	137.398	Hi5	unknow	0	0
1358	191797	6441.08	10735.7	10380.7	543.93	129.781	141.781	Hi5	unknow	0	0
1359	191797	6444.54	10643.8	10370.8	543.424	129.867	140.098	Hi5	unknow	0	0
1360	191797	6418.07	10785.2	10379.6	543.947	129.222	142.733	Hi5	unknow	0	0
1361	191797	6508.95	10802.7	10384.9	543.844	131.308	142.961	Hi5	unknow	0	0
1362	191797	6558.94	10584.8	8045.42	413.318	118.432	149.958	Hi5	ICe	0	0
1363	191797	6483.6	10620	3518.82	170.177	86.151	155.138	Hi5	MOp5	1	0
1364	191797	3610.06	10480.9	8605.69	454.345	57.399	144.694	Hi5	SIM	0	0
1365	191797	3529.73	10529	8622.96	455.664	55.656	145.439	Hi5	SIM	0	0
1366	191797	3323.2	10662.6	7058.31	367.947	39.979	150.926	Hi5	VISp5	1	1
1367	191797	3362.73	10598.6	9143.77	485.507	53.733	144.466	Hi5	unknow	0	0
1368	191797	3446.56	10646.3	9197.21	488.269	55.813	145.195	Hi5	unknow	0	0
1369	191797	3463.1	10567	9155.29	485.806	56.105	143.898	Hi5	unknow	0	0
1370	191797	7617.36	10543.2	7221.28	365.798	132.29	152.074	Hi5	MRN	0	0
1371	191797	7733.72	10617.4	7345.36	372.453	136.119	152.547	Hi5	MRN	0	0
1372	191797	7767.69	10520	7422.76	376.59	137.689	150.43	Hi5	MB	0	0
1373	191797	7667.14	10593.7	7387.57	374.857	135.212	151.93	Hi5	MB	0	0
1374	191797	7760.95	10658.4	4342.02	222.553	116.624	163.681	Hi5	CP	0	0
1375	191797	7671.01	10510.2	3549.32	176.853	114.881	155.553	Hi5	scwm	0	0
1376	191797	7713.9	10578.8	4120.49	210.997	116.583	161.614	Hi5	CP	0	0
1377	191797	7669.6	10622.6	4112.9	210.463	115.655	162.186	Hi5	CP	0	0
1378	191797	7787.8	10676.3	4184.76	214.827	117.857	163.754	Hi5	CP	0	0
1379	191797	7856.48	10729	4295.3	220.74	118.777	165.084	Hi5	CP	0	0
1380	191797	7606.19	10665.9	4156.44	212.543	114.175	162.899	Hi5	CP	0	0
1381	191797	6540.18	10666.8	8611.43	444.326	122.228	149.343	Hi5	CUL4, 5	0	0
1382	191797	3379	10513.6	8671.55	458.945	52.421	144.86	Hi5	SIM	0	0
1383	191797	3329.07	10431.5	8714.76	461.492	51.468	143.162	Hi5	unknow	0	0
1384	191797	7275.65	10495.6	7023.26	355.375	122.724	152.354	Hi5	SCig	0	0
1385	191797	14187	10700.3	5406.3	264.189	258.953	153.634	Hi5	MEA	0	0
1386	191797	3423.18	10661.1	8650.77	457.723	53.346	147.614	Hi5	SIM	0	0
1387	191797	14303.7	10704.5	3968.1	188.055	249.943	151.427	Hi5	ACB	0	0
1388	191797	14328.6	10775.5	4012.72	190.512	250.916	152.596	Hi5	ACB	0	0
1389	191797	14298.8	10811	3890.54	183.827	249.695	153.111	Hi5	ACB	0	0
1390	191797	14273.9	10670.1	3757.28	176.171	248.275	150.687	Hi5	ACB	0	0
1391	191797	14192.7	10740.1	3708.39	173.803	246.5	151.912	Hi5	ACB	0	0
1392	191797	14371	10582	3494.03	160.334	249.704	148.405	Hi5	OLF	0	0
1393	191797	14289	10490.5	3497.78	160.763	247.729	147.032	Hi5	PIR	0	0
1394	191797	14388	10704.7	3391.65	154.329	250.325	149.975	Hi5	OLF	0	0
1395	191797	14394.8	10572.5	4166.59	198.539	252.826	149.303	Hi5	ACB	0	0
1396	191797	3796.39	10450.9	9080.65	480.409	63.597	142.22	Hi5	unknow	0	0
1397	191797	3835.8	10469.2	9085.61	480.559	64.508	142.566	Hi5	unknow	0	0
1398	191797	3877.12	10451.7	9083	480.242	65.458	142.29	Hi5	unknow	0	0
1399	191797	3946.05	10355.2	9041.76	477.573	66.949	140.747	Hi5	unknow	0	0
1400	191797	3936.25	10691.6	9165.25	484.87	66.929	146.399	Hi5	unknow	0	0
1401	191797	3845.83	10708.8	9169.77	485.465	64.858	146.631	Hi5	unknow	0	0
1402	191797	4056.71	10631.2	9134.46	482.63	69.628	145.507	Hi5	ANcr1	0	0
1403	191797	4041.11	10781.8	9191.87	486.078	69.351	148.01	Hi5	ANcr1	0	0
1404	191797	11974.4	10473.5	10523.1	534.459	251.686	129.12	Hi5	unknow	1	0
1405	191797	12017.9	10515.2	10549.4	535.815	252.889	129.735	Hi5	unknow	1	0
1406	191797	12087.8	10655.2	3085.4	142.299	201.969	149.606	Hi5	PIR	0	0
1407	191797	5169.57	10693.5	7990.14	414.606	88.503	152.02	Hi5	ICe	0	0
1408	191797	5132.34	10566.2	8114.4	421.629	88.459	149.365	Hi5	ICe	0	0
1409	191797	5299.43	10654.4	7855.32	406.541	90.218	151.757	Hi5	ICe	0	0
1410	191797	5164.45	10675.2	10142.3	535.96	99.306	142.341	Hi5	unknow	0	0
1411	191797	5127.97	10725.5	10134.9	535.708	98.383	143.324	Hi5	unknow	0	0
1412	191797	5025.96	10564	10111	534.618	96.04	140.439	Hi5	unknow	0	0
1413	191797	5035.65	10518.2	10111.3	534.575	96.303	139.578	Hi5	unknow	0	0
1414	191797	5237.69	10522.3	10156.1	536.384	101.194	139.396	Hi5	unknow	0	0
1415	191797	5268.94	10490.4	10160.3	536.497	101.963	138.767	Hi5	unknow	0	0
1416	191797	5302.6	10572.7	10165.5	536.717	102.701	140.275	Hi5	unknow	0	0
1417	191797	5310.8	10624.5	10166.4	536.769	102.854	141.237	Hi5	unknow	0	0
1418	191797	5327.01	10457.5	10167.6	536.688	103.367	138.094	Hi5	unknow	0	0
1419	191797	16208.2	10693.2	4249.54	196.727	294.362	148.258	Hi5	OT	0	0
1420	191797	16143.2	10675.5	4294.93	199.419	293.096	148.114	Hi5	OT	0	0
1421	191797	16253	10726.8	4261.58	197.259	295.555	148.762	Hi5	OT	0	0
1422	191797	16127.5	10787.3	4416.12	206.115	293.815	150.113	Hi5	OT	0	0
1423	191797	16129.4	10612.3	4475.56	209.322	293.928	147.259	Hi5	OT	0	0
1424	191797	16169.4	10557	4439.46	207.222	294.472	146.254	Hi5	OT	0	0
1425	191797	16084.7	10579	4465.94	208.921	292.744	146.767	Hi5	OT	0	0
1426	191797	16103.3	10707.1	4490.68	210.242	293.64	148.884	Hi5	OT	0	0
1427	191797	16221	10737.7	4405.47	205.247	295.809	149.144	Hi5	OT	0	0
1428	191797	5842.53	10311.4	6232.55	313.79	83.211	150.548	Hi5	DG-mo	1	0
1429	191797	5983.84	10398.8	8038.99	414.528	106.084	147.041	Hi5	ICe	0	0
1430	191797	5975.06	10302.7	8141.25	420.153	106.652	144.926	Hi5	SIM	0	0
1431	191797	6016.92	10125.8	8445.09	436.402	109.73	140.355	Hi5	SIM	0	0
1432	191797	6116.45	10404.4	9929.7	520.976	120.506	137.673	Hi5	unknow	0	0
1433	191797	15122.1	10224.6	4060.67	189.425	267.476	141.92	Hi5	SI	0	0
1434	191797	15060.2	10456.2	3783.58	174.187	265.447	145.548	Hi5	SI	0	0
1435	191797	15079.6	10448.6	3712.8	170.033	265.677	145.262	Hi5	OT	0	0
1436	191797	14985.5	10362.5	3811.39	175.944	263.662	144.218	Hi5	SI	0	0
1437	191797	15075.3	10262.4	3423.3	152.977	264.938	141.287	Hi5	unknow	0	0
1438	191797	15128.4	10245.1	3370.26	149.642	266.152	140.608	Hi5	unknow	0	0
1439	191797	15185.7	10166.3	3489.82	156.336	267.259	139.702	Hi5	OT	0	0
1440	191797	15157.5	10326	3445.39	154.019	266.925	142.262	Hi5	OT	0	0
1441	191797	14973.9	10172.5	3436.4	154.039	262.463	140.078	Hi5	OT	0	0
1442	191797	3307.24	10318.3	8928.42	473.41	51.824	140.158	Hi5	unknow	0	0
1443	191797	3464.78	10374.3	9057.73	480.189	55.919	140.724	Hi5	unknow	0	0
1444	191797	3431.86	10300.2	9014.58	477.814	55.037	139.527	Hi5	unknow	0	0
1445	191797	3541.91	10411.4	9085.74	481.536	57.778	141.333	Hi5	unknow	0	0
1446	191797	3327.99	10270.2	8901.69	471.805	52.216	139.413	Hi5	unknow	0	0
1447	191797	3329.7	10226.9	8888.51	471.019	52.214	138.689	Hi5	unknow	0	0
1448	191797	3332.66	10205.4	8856.31	469.191	52.158	138.445	Hi5	unknow	0	0
1449	191797	3371.26	10201.5	8919.1	472.571	53.305	138.114	Hi5	unknow	0	0
1450	191797	3538.18	10194.3	6287.98	319.488	39.142	143.809	Hi5	VISpm5	1	1
1451	191797	3645.41	10093.8	6226.5	315.446	40.92	142.359	Hi5	VISpm5	1	0
1452	191797	7330.63	10243.8	10423.3	542.908	150.155	131.495	Hi5	unknow	0	0
1453	191797	7214.42	10164.9	10401.9	542.235	147.505	130.25	Hi5	unknow	0	0
1454	191797	7214.39	10338.5	4046.47	204.394	106.087	155.505	Hi5	ccb	0	0
1455	191797	14196.3	10544.2	3923.99	185.858	246.986	148.953	Hi5	ACB	0	0
1456	191797	14262.2	10440.6	3794.85	178.054	247.65	146.98	Hi5	ACB	0	0
1457	191797	14282.8	10667.9	3801.62	178.671	248.626	150.691	Hi5	ACB	0	0
1458	191797	7163.86	10147.9	4159.86	210.185	104.907	152.627	Hi5	ccb	0	0
1459	191797	7259.79	10192.1	4109.17	207.924	107.073	153.468	Hi5	CP	0	0
1460	191797	7212.42	10326.6	4046.92	204.397	106.045	155.297	Hi5	ccb	0	0
1461	191797	7262.89	10363.7	9989.25	519.316	146.355	136.072	Hi5	PRM	0	0
1462	191797	7354.7	10321.4	10003.8	519.771	148.456	135.118	Hi5	PRM	0	0
1463	191797	7380.32	10439.2	10040.4	521.68	149.161	137.111	Hi5	PRM	0	0
1464	191797	7276.43	10380.7	7371.16	374.557	126.886	148.556	Hi5	ICe	0	0
1465	191797	7315.62	10238.2	9964.33	517.725	147.427	133.804	Hi5	PRM	0	0
1466	191797	7388.34	10255.7	9998.7	519.369	149.191	133.878	Hi5	PRM	0	0
1467	191797	7090.46	10468.9	9946.61	517.615	142.284	138.422	Hi5	PRM	0	0
1468	191797	15409.4	10337.1	3813.74	174.517	273.253	142.93	Hi5	OT	0	0
1469	191797	15474.5	10429.3	3836.51	175.69	274.987	144.378	Hi5	OT	0	0
1470	191797	15484.2	10440.3	3744.87	170.391	274.975	144.352	Hi5	OT	0	0
1471	191797	15482.1	10288.5	3744.1	170.198	274.637	141.839	Hi5	OT	0	0
1472	191797	5597.41	10418.2	9497.55	497.844	106.592	140.345	Hi5	ANcr2	0	0
1473	191797	5734.95	10154	10077.5	530.348	112.615	132.503	Hi5	unknow	0	0
1474	191797	5744.65	10212.6	10045.9	528.629	112.657	133.731	Hi5	unknow	0	0
1475	191797	5679.98	10247.7	10082.7	530.863	111.303	134.285	Hi5	unknow	0	0
1476	191797	5653.37	10231.1	10128.8	533.436	110.905	133.807	Hi5	unknow	0	0
1477	191797	5672.72	10136.7	10168.6	535.461	111.589	131.865	Hi5	unknow	0	0
1478	191797	5742.37	10093.2	10100	531.505	112.924	131.263	Hi5	unknow	0	0
1479	191797	5839.9	10086.1	10026.1	527.162	114.853	131.361	Hi5	unknow	0	0
1480	191797	5853.51	10130.7	10008.1	526.159	115.056	132.27	Hi5	unknow	0	0
1481	191797	5818.44	10293.3	8022.05	414.059	102.309	145.288	Hi5	ICe	0	0
1482	191797	5738.89	10431	10004.3	526.495	112.169	138.034	Hi5	unknow	0	0
1483	191797	5689.06	10459.4	10016.4	527.342	111.051	138.545	Hi5	unknow	0	0
1484	191797	5666.98	10396.9	10049.8	529.204	110.743	137.238	Hi5	unknow	0	0
1485	191797	5849.1	10391.5	9965.84	523.973	114.564	137.395	Hi5	unknow	0	0
1486	191797	5878.81	10336.4	9962.44	523.657	115.276	136.35	Hi5	unknow	0	0
1487	191797	5620.06	10343.7	10138.6	534.135	110.099	135.909	Hi5	unknow	0	0
1488	191797	5581.67	10360.1	10143.8	534.546	109.223	136.22	Hi5	unknow	0	0
1489	191797	5567.01	10472	10125	533.642	108.714	138.407	Hi5	unknow	0	0
1490	191797	5648.6	10241	10128.6	533.444	110.787	133.996	Hi5	unknow	0	0
1491	191797	5531.09	10238.7	10205.8	537.97	108.418	133.73	Hi5	unknow	0	0
1492	191797	5650.05	10381.4	10066.4	530.157	110.439	136.887	Hi5	unknow	0	0
1493	191797	13062.8	10270.8	4336.25	213.214	225.094	148.961	Hi5	act	0	0
1494	191797	13046.5	10407.6	3252.88	150.049	221.063	145.567	Hi5	PIR	0	0
1495	191797	13082.4	10410.8	3145.49	143.131	221.926	144.683	Hi5	PIR	0	0
1496	191797	13124.6	10396.6	3248.12	149.491	222.678	145.26	Hi5	PIR	0	0
1497	191797	13169.8	10365.5	3264.39	150.316	223.557	144.811	Hi5	PIR	0	0
1498	191797	13122.2	10234.2	3592.65	170.559	222.501	145.036	Hi5	CP	0	0
1499	191797	13193.4	10136.8	3553.35	167.667	223.713	143.001	Hi5	CP	0	0
1500	191797	13221.1	10205.2	3481.09	163.294	224.345	143.619	Hi5	EPd	0	0
1501	191797	13138.4	10334.8	3449.81	161.949	222.847	145.722	Hi5	EPd	0	0
1502	191797	13235.4	10419.1	3410.52	159.347	224.996	146.755	Hi5	EPd	0	0
1503	191797	11578.8	10228.1	3087.17	142.672	191.382	143.338	Hi5	AIv2/3	0	0
1504	191797	11601	10384.7	3106.34	144.343	192.012	146.196	Hi5	AIv2/3	0	0
1505	191797	11566.3	10394.6	3086.87	143.128	191.344	146.191	Hi5	AIv2/3	0	0
1506	191797	11643.8	10325	3063.46	141.132	192.776	144.563	Hi5	AIv2/3	0	0
1507	191797	11700.2	10300.3	3085.78	142.444	193.848	144.306	Hi5	AIv2/3	0	0
1508	191797	11722.7	10267.4	3104.83	143.596	194.245	143.931	Hi5	AIv2/3	0	0
1509	191797	11815	10186	3133.14	145.051	195.951	142.691	Hi5	AIv2/3	0	0
1510	191797	3802.63	10295.9	9400.46	498.178	64.953	138.294	Hi5	unknow	0	0
1511	191797	3699.36	10374.1	8582.76	452.613	59.285	142.916	Hi5	SIM	0	0
1512	191797	3788.55	10386.1	8563.58	451.181	61.212	143.255	Hi5	SIM	0	0
1513	191797	3762.94	10427.8	8571.58	451.769	60.689	143.96	Hi5	SIM	0	0
1514	191797	3843.42	10388.8	8553.39	450.385	62.402	143.372	Hi5	SIM	0	0
1515	191797	3731.85	10505.8	9106.01	482.109	62.167	143.085	Hi5	unknow	0	0
1516	191797	13862.6	10326	4041.99	193.705	239.93	146.296	Hi5	ACB	0	0
1517	191797	14040.6	10410.4	4012.58	191.374	243.771	147.191	Hi5	ACB	0	0
1518	191797	13997.5	10325.9	3891.05	184.564	241.994	145.699	Hi5	ACB	0	0
1519	191797	14034.9	10341.4	3883.37	183.982	242.806	145.867	Hi5	ACB	0	0
1520	191797	14083.2	10203.9	4119.81	196.882	244.846	143.856	Hi5	ACB	0	0
1521	191797	14052.1	10240	4240.98	203.73	245.195	144.828	Hi5	FS	0	0
1522	191797	14108.2	10273.4	4248.27	203.928	246.535	145.243	Hi5	FS	0	0
1523	191797	14136.8	10385.4	4233.54	203.131	247.316	146.974	Hi5	FS	0	0
1524	191797	13985.2	10177.4	3991	190.068	241.843	143.387	Hi5	ACB	0	0
1525	191797	14139.5	10091.1	3993.38	189.389	244.978	141.576	Hi5	ACB	0	0
1526	191797	14196.8	10303.6	3988.59	189.18	246.736	145.018	Hi5	ACB	0	0
1527	191797	14118	10238.1	4040.15	192.335	245.157	144.177	Hi5	ACB	0	0
1528	191797	14114.1	10267.6	4214.32	202.04	246.379	145.049	Hi5	FS	0	0
1529	191797	14041.5	10393.7	5047.62	246.08	251.421	149.15	Hi5	MEA	1	0
1530	191797	13976	10299.5	3454.62	159.126	240.528	144.05	Hi5	PIR	0	0
1531	191797	13931.7	10357	3419.8	157.3	239.67	144.906	Hi5	PIR	0	0
1532	191797	13906	10220.6	3463.85	159.798	238.874	142.836	Hi5	PIR	0	0
1533	191797	13932.7	10187.2	3488.61	161.113	239.403	142.354	Hi5	PIR	0	0
1534	191797	14024.5	10237.6	3452.46	158.715	241.47	142.917	Hi5	PIR	0	0
1535	191797	14048.8	10203.5	3480.88	160.252	241.947	142.444	Hi5	PIR	0	0
1536	191797	14081.8	10236	3473.05	159.721	242.72	142.919	Hi5	PIR	0	0
1537	191797	10387.8	10289.8	3381.28	166.287	168.918	150.621	Hi5	CP	0	0
1538	191797	10271.4	10360	3294.38	160.741	166.485	150.731	Hi5	CP	0	0
1539	191797	10430.1	10236.2	7144.38	358.676	190.054	146.874	Hi5	SNr	0	0
1540	191797	10380.1	10291.9	6905.3	345.848	186.36	150.327	Hi5	SNr	0	0
1541	191797	10425.3	10274.8	3719.51	188.535	170.49	154.559	Hi5	CP	0	0
1542	191797	10295.6	10394.7	3650.48	184.859	167.955	156.095	Hi5	CP	0	0
1543	191797	10237.1	10204.7	3922.91	201.354	167.102	155.635	Hi5	CP	0	0
1544	191797	10341.9	10123.2	4039.27	207.635	169.123	154.806	Hi5	CP	0	0
1545	191797	10110.5	10313.9	2995.57	139.983	162.479	145.775	Hi5	AIv6a	0	0
1546	191797	10184.9	10333.1	3003.91	140.485	164.012	146.152	Hi5	AIv6a	0	0
1547	191797	10269.6	10379.3	3019.79	141.558	165.792	147.083	Hi5	ORBl6a	0	0
1548	191797	10278.8	10330.3	2949.68	136.529	165.79	145.251	Hi5	AIv5	0	0
1549	191797	14752	10378.8	4010.82	188.186	259.254	145.151	Hi5	ACB	0	0
1550	191797	14832.8	10416.8	4124.12	194.241	261.739	145.732	Hi5	SI	0	0
1551	191797	14632.1	10252.6	4002.93	188.068	256.275	143.289	Hi5	ACB	0	0
1552	191797	14876.5	10367.4	5672.09	276.603	276.679	146.434	Hi5	MEA	0	0
1553	191797	14768.6	10438.8	5632.45	274.671	273.954	147.861	Hi5	MEA	0	0
1554	191797	14760	10415.2	5582.38	271.989	273.099	147.551	Hi5	MEA	0	0
1555	191797	14803.5	10432.4	5625.5	274.225	274.662	147.68	Hi5	MEA	0	0
1556	191797	14798.2	10331.4	5646.28	275.356	274.432	146.078	Hi5	MEA	0	0
1557	191797	14668.2	10273.4	3819.68	177.519	256.396	143.468	Hi5	ACB	0	0
1558	191797	14588.7	10322.7	3849.6	179.628	254.816	144.455	Hi5	ACB	0	0
1559	191797	14686.1	10257.1	3440.18	155.504	256.115	142.188	Hi5	OT	0	0
1560	191797	14646	10205	3385.48	152.381	255.145	141.097	Hi5	OT	0	0
1561	191797	14603	10355.4	4089.52	193.168	256.324	145.139	Hi5	ACB	0	0
1562	191797	14666.8	10378.1	4185.18	198.243	258.377	145.508	Hi5	ACB	0	0
1563	191797	14702.4	10334.4	4060.84	191.139	258.309	144.557	Hi5	ACB	0	0
1564	191797	14677.2	10434.5	4088.23	192.879	258.13	146.298	Hi5	ACB	0	0
1565	191797	14913.7	10328.5	4019.97	188.015	262.803	144.007	Hi5	SI	0	0
1566	191797	16237.9	10355.3	4012.44	183.246	293.165	142.228	Hi5	OT	0	0
1567	191797	16170.3	10375.9	4482.65	209.507	294.47	143.265	Hi5	OT	0	0
1568	191797	16188.1	10404.3	4305.86	199.81	293.669	143.547	Hi5	OT	0	0
1569	191797	16266.6	10321.1	4179.37	192.572	294.584	141.894	Hi5	OT	0	0
1570	191797	15733.3	10294.1	3587.02	160.221	280.176	140.992	Hi5	unknow	0	0
1571	191797	15744.2	10337.2	3667.01	164.884	280.616	141.944	Hi5	OT	0	0
1572	191797	15842.6	10406	3704.64	166.802	283.094	143.017	Hi5	OT	0	0
1573	191797	15864.3	10326.9	3644.82	163.19	283.35	141.474	Hi5	unknow	0	0
1574	191797	15745.4	10476.1	3603.85	161.307	280.82	144.069	Hi5	OT	0	0
1575	191797	15674	10403.6	4526.91	213.362	283.434	144.565	Hi5	OT	0	0
1576	191797	15739.9	10373.1	4587.97	216.445	285.377	144.01	Hi5	OT	0	0
1577	191797	15870.2	10235	3851.36	175.068	283.78	140.503	Hi5	OT	0	0
1578	191797	15830.9	10373.8	4282.19	199.548	285.174	143.531	Hi5	OT	0	0
1579	191797	6501.28	10375.1	10452.8	547.605	131.66	134.671	Hi5	unknow	0	0
1580	191797	6547.42	10395.7	10437.1	546.593	132.627	135.08	Hi5	unknow	0	0
1581	191797	6590.08	10324.9	10016.8	523.786	131.678	135.574	Hi5	unknow	0	0
1582	191797	6614.76	10341.6	10065.2	526.35	132.459	135.648	Hi5	unknow	0	0
1583	191797	6495.84	10158.7	9026.42	466.832	124.129	138.162	Hi5	arb	0	0
1584	191797	6439.06	10330.8	9084.04	470.47	123.191	141.026	Hi5	arb	0	0
1585	191797	6459.46	10429.7	9111.61	472.043	123.746	142.699	Hi5	ANcr1	0	0
1586	191797	6342.68	10300.9	9073.08	470.193	121.062	140.535	Hi5	ANcr1	0	0
1587	191797	6318.91	10448.5	9133.03	473.83	120.834	142.926	Hi5	ANcr1	0	0
1588	191797	6452.71	10297.6	8723.55	450.266	121.125	142.194	Hi5	SIM	0	0
1589	191797	6472.34	10272.3	8705.91	449.197	121.425	141.805	Hi5	SIM	0	0
1590	191797	6520.09	10369.7	10345.6	541.85	131.611	134.994	Hi5	unknow	0	0
1591	191797	6419.78	10411.7	10339.8	541.929	129.287	135.887	Hi5	unknow	0	0
1592	191797	6590.86	10304.4	10349.4	541.789	133.26	133.692	Hi5	unknow	0	0
1593	191797	6445.32	10337.9	10328.4	541.232	129.854	134.527	Hi5	unknow	0	0
1594	191797	6428.1	10277.5	10263.7	537.858	129.205	133.67	Hi5	unknow	0	0
1595	191797	6390.18	10335.9	10295	539.676	128.454	134.667	Hi5	unknow	0	0
1596	191797	6476.96	10259.5	10321.6	540.755	130.579	133.054	Hi5	unknow	0	0
1597	191797	6483.66	10280.4	10224.8	535.556	130.287	133.85	Hi5	unknow	0	0
1598	191797	6548.71	10258.4	10187.8	533.301	131.6	133.552	Hi5	unknow	0	0
1599	191797	6621.87	10274.6	10103.6	528.424	132.843	134.195	Hi5	unknow	0	0
1600	191797	6622.73	10231.4	10130.2	529.875	133.012	133.252	Hi5	unknow	0	0
1601	191797	6507.87	10158.3	10310	540.019	131.273	131.172	Hi5	unknow	0	0
1602	191797	6471.2	10168	10279.9	538.551	130.306	131.507	Hi5	unknow	0	0
1603	191797	6672.3	10171.8	10102.6	528.162	134.025	132.22	Hi5	unknow	0	0
1604	191797	5054.45	10241.2	9131.92	478.292	92.72	138.981	Hi5	ANcr1	0	0
1605	191797	5116.26	10229.4	9138.49	478.428	94.17	138.747	Hi5	arb	0	0
1606	191797	5070.46	10131.1	9091.18	475.791	92.951	137.181	Hi5	ANcr1	0	0
1607	191797	5112.82	10111.4	9084.79	475.247	93.892	136.867	Hi5	ANcr1	0	0
1608	191797	5183.78	10108.1	9101	475.909	95.589	136.738	Hi5	ANcr1	0	0
1609	191797	4935.9	10115.3	9066.46	474.874	89.776	136.967	Hi5	ANcr1	0	0
1610	191797	5014.89	10392.4	9838.92	519.522	94.645	138.335	Hi5	unknow	0	0
1611	191797	4864.77	10300.1	8702.91	454.797	86.167	141.948	Hi5	arb	0	0
1612	191797	4783.18	10355.7	8715.73	455.874	84.429	142.831	Hi5	SIM	0	0
1613	191797	4917.81	10282.2	8698.21	454.318	87.316	141.69	Hi5	arb	0	0
1614	191797	4982.4	10301.4	8706.71	454.562	88.806	142.062	Hi5	arb	0	0
1615	191797	4915.93	10343	8728.54	456.066	87.46	142.673	Hi5	arb	0	0
1616	191797	4875.02	10225.8	8680.24	453.433	86.246	140.695	Hi5	SIM	0	0
1617	191797	4975.1	10245.4	8691.46	453.694	88.541	141.097	Hi5	arb	0	0
1618	191797	5016.69	10226.9	8686.82	453.265	89.431	140.813	Hi5	arb	0	0
1619	191797	5040.67	10280.3	8707.5	454.365	90.1	141.726	Hi5	arb	0	0
1620	191797	4961.25	10346.5	8814.55	460.687	88.948	142.432	Hi5	SIM	0	0
1621	191797	5106.09	10290.9	8722.22	454.941	91.642	141.917	Hi5	arb	0	0
1622	191797	5111.71	10289	9552.3	502.665	95.71	137.729	Hi5	ANcr2	0	0
1623	191797	5001.59	10196.2	9542.8	502.391	93.188	136.068	Hi5	ANcr2	0	0
1624	191797	4956.98	10152.6	9538.85	502.266	92.172	135.283	Hi5	ANcr2	0	0
1625	191797	5042.72	10407.1	10107.3	534.258	96.538	137.513	Hi5	unknow	0	0
1626	191797	5020.22	10354	10100.5	533.914	96.026	136.556	Hi5	unknow	0	0
1627	191797	5051.81	10307.2	10107.9	534.186	96.828	135.638	Hi5	unknow	0	0
1628	191797	4819.92	10192.6	5619.32	278.9	59.268	146.1	Hi5	SSp-tr6a	0	0
1629	191797	5070.4	10396.8	9368.89	492.187	93.947	140.627	Hi5	ANcr1	0	0
1630	191797	5218.38	10556.8	8323.65	432.908	91.777	148.379	Hi5	SIM	0	0
1631	191797	7232.8	10351	4438.44	224.877	105.361	156.977	Hi5	CP	0	0
1632	191797	7163.89	10324.3	4445.99	224.944	103.895	156.303	Hi5	CP	0	0
1633	191797	14893.2	10314.1	3384.23	151.45	260.92	142.387	Hi5	OT	0	0
1634	191797	5025.55	10337.3	8819.4	460.694	90.412	142.301	Hi5	SIM	0	0
1635	191797	5003.17	10345.9	8828.03	461.274	89.959	142.4	Hi5	SIM	0	0
1636	191797	4896.8	10386.6	8804.53	460.421	87.45	143.141	Hi5	SIM	0	0
1637	191797	4943.09	10407.8	8867.38	463.784	88.814	143.294	Hi5	SIM	0	0
1638	191797	4890.43	10435.5	8870.42	464.193	87.64	143.737	Hi5	SIM	0	0
1639	191797	4968.38	10454.3	8901.53	465.656	89.547	143.995	Hi5	SIM	0	0
1640	191797	5014.02	10419.4	8904.18	465.59	90.597	143.386	Hi5	SIM	0	0
1641	191797	5010.42	10438.2	8917.08	466.353	90.577	143.66	Hi5	SIM	0	0
1642	191797	5069.26	10450.1	8884.09	464.268	91.73	144.078	Hi5	SIM	0	0
1643	191797	5070.11	10364.2	8891.36	464.589	91.801	142.491	Hi5	SIM	0	0
1644	191797	4778.39	10407.6	8753.96	458.078	84.533	143.617	Hi5	SIM	0	0
1645	191797	4776.94	10443.3	8796.79	460.517	84.721	144.089	Hi5	SIM	0	0
1646	191797	4816.88	10430.8	8826.71	462.025	85.769	143.777	Hi5	SIM	0	0
1647	191797	4857.13	10401.5	8776.07	459.001	86.412	143.49	Hi5	SIM	0	0
1648	191797	4976.48	10329.5	8748.04	456.904	88.917	142.407	Hi5	arb	0	0
1649	191797	8135.9	10307.6	7264.01	367.308	143.558	147.745	Hi5	MB	0	0
1650	191797	8063.93	10403.4	7242.97	366.293	141.813	149.536	Hi5	MRN	0	0
1651	191797	7973.72	10287.4	10431.5	540.943	164.27	131.41	Hi5	unknow	0	0
1652	191797	7993.1	10161.4	10132.8	524.628	163.033	130.647	Hi5	unknow	0	0
1653	191797	8009.62	10185.6	10147.1	525.353	163.465	130.993	Hi5	unknow	0	0
1654	191797	7955.33	10184.1	10128.8	524.531	162.192	131.151	Hi5	unknow	0	0
1655	191797	7974.85	10221.9	10144.3	525.308	162.691	131.741	Hi5	unknow	0	0
1656	191797	8063.83	10211.1	10198.5	527.993	164.928	131.087	Hi5	unknow	0	0
1657	191797	8093.5	10258.1	10259.2	531.195	165.908	131.571	Hi5	unknow	0	0
1658	191797	8133.45	10233.3	10281.3	532.27	166.902	130.923	Hi5	unknow	0	0
1659	191797	7990.21	10332.3	10234.2	530.171	163.519	133.263	Hi5	unknow	0	0
1660	191797	8068.86	10128.5	10150.9	525.371	164.774	129.812	Hi5	unknow	0	0
1661	191797	7852.95	10472.7	10204.7	529.008	160.345	136.274	Hi5	unknow	0	0
1662	191797	7738.64	10494.3	10142.3	525.961	157.496	137.19	Hi5	PRM	0	0
1663	191797	7931.1	10423.8	10244.4	530.904	162.274	135.006	Hi5	unknow	0	0
1664	191797	8055.69	10106.4	10135.5	524.57	164.406	129.508	Hi5	unknow	0	0
1665	191797	8020.53	10102	10118.3	523.736	163.55	129.579	Hi5	unknow	0	0
1666	191797	7990.18	10238.5	9654.03	497.089	159.708	135.52	Hi5	PRM	0	0
1667	191797	8035.85	10266.7	9665.44	497.563	160.712	135.943	Hi5	PRM	0	0
1668	191797	8122.88	10272.5	9690.41	498.674	162.69	135.8	Hi5	PRM	0	0
1669	191797	8033.99	10193.8	9653.01	496.879	160.647	134.657	Hi5	PRM	0	0
1670	191797	8057.33	10332.3	2578.71	113.644	116.453	143.779	Hi5	MOs5	1	0
1671	191797	8030.96	10155.4	4154.53	213.274	123.24	155.401	Hi5	CP	0	0
1672	191797	8000.87	10240.6	4268.1	219.26	122.153	157.244	Hi5	CP	0	0
1673	191797	7966.16	10175.6	4242.37	217.733	121.593	155.954	Hi5	CP	0	0
1674	191797	8074.65	10231.5	3808.77	193.666	124.46	154.18	Hi5	CP	0	0
1675	191797	8056.58	10235.6	4435.6	227.669	122.473	157.589	Hi5	CP	0	0
1676	191797	8081.06	10227.1	4426.42	227.298	123.027	157.503	Hi5	CP	0	0
1677	191797	8046.56	10275.5	4416.15	226.752	122.344	158.214	Hi5	CP	0	0
1678	191797	8142.18	10222.1	4411.27	226.753	124.353	157.559	Hi5	CP	0	0
1679	191797	8170.19	10244.1	4429.16	227.721	124.813	157.998	Hi5	CP	0	0
1680	191797	8173.33	10274.1	4416.7	227.173	124.921	158.497	Hi5	CP	0	0
1681	191797	7531.16	10314.6	8406.73	429.601	141.203	143.131	Hi5	CUL4, 5	0	0
1682	191797	7408.83	10449.8	10049.2	522.05	149.825	137.235	Hi5	PRM	0	0
1683	191797	7482.11	10471.1	10073.1	523.089	151.544	137.428	Hi5	PRM	0	0
1684	191797	7316.08	10552.4	10049.7	522.408	147.755	139.247	Hi5	PRM	0	0
1685	191797	7661.06	10304.6	4123.44	210.552	115.609	156.763	Hi5	CP	0	0
1686	191797	7579.9	10337.3	4138.1	211.055	113.846	157.142	Hi5	CP	0	0
1687	191797	7552.32	10246.3	8379.72	428.056	141.462	141.989	Hi5	CUL4, 5	0	0
1688	191797	7411.7	10384.3	3752.97	188.339	110.024	154.821	Hi5	scwm	0	0
1689	191797	7471.69	10320.3	7579.21	385.534	133.218	146.508	Hi5	MB	0	0
1690	191797	7164.16	10432	8754.54	449.461	136.183	144.264	Hi5	SIM	0	0
1691	191797	7161.97	10365	8729.2	448.019	136.002	143.146	Hi5	SIM	0	0
1692	191797	7058.75	10459.9	8761.64	450.272	134.04	144.78	Hi5	SIM	0	0
1693	191797	7051.6	10346.2	8731.54	448.532	133.745	142.843	Hi5	SIM	0	0
1694	191797	6993.92	10401.5	8751.51	449.896	132.657	143.788	Hi5	SIM	0	0
1695	191797	6952.7	10466.6	8758.92	450.531	131.822	144.951	Hi5	SIM	0	0
1696	191797	6977.45	10495.5	8768.28	450.981	132.382	145.428	Hi5	SIM	0	0
1697	191797	6990.19	10319	8724.93	448.369	132.437	142.401	Hi5	SIM	0	0
1698	191797	6975.36	10276.9	8713	447.728	132.064	141.691	Hi5	SIM	0	0
1699	191797	7014.56	10277.7	8711.52	447.504	132.869	141.696	Hi5	SIM	0	0
1700	191797	7029.4	10311	9857.13	512.825	140.545	135.979	Hi5	PRM	0	0
1701	191797	6926.2	10343.6	7628.93	389.323	122.266	147.135	Hi5	ICe	0	0
1702	191797	7047.36	10421	8502.17	436.305	132.041	145.041	Hi5	CUL4, 5	0	0
1703	191797	7601.13	10247.1	4501.09	229.304	112.756	156.512	Hi5	CP	0	0
1704	191797	7659.4	10145.3	4540.82	231.344	113.804	155.021	Hi5	CP	0	0
1705	191797	6983.86	10376.3	9007.63	464.046	134.186	142.239	Hi5	arb	0	0
1706	191797	6892.71	10278.7	9012.47	464.591	132.38	140.435	Hi5	arb	0	0
1707	191797	6847.47	10418.7	4511.22	226.747	96.845	156.756	Hi5	ccb	0	0
1708	191797	6947.58	10182.2	4470.43	225.18	99.31	153.209	Hi5	ccb	0	0
1709	191797	6944.75	10268.1	4414.25	222.356	99.407	154.57	Hi5	ccb	0	0
1710	191797	6803.22	10318.3	4436.75	222.818	96.242	154.922	Hi5	scwm	0	0
1711	191797	7041.76	10407.2	4005.54	201.305	102.179	155.897	Hi5	MOp6b	0	0
1712	191797	11094.9	10196.7	3414.17	166.33	182.447	148.102	Hi5	CP	0	0
1713	191797	16001.6	10248.7	4122.74	190.118	287.966	140.991	Hi5	OT	0	0
1714	191797	4273.04	10235.8	6257.23	316.764	54.692	146.075	Hi5	fp	0	0
1715	191797	4342.57	10315.6	6382.74	324.389	57.339	147.362	Hi5	fp	0	0
1716	191797	4334.71	10159.9	6229.65	315.017	55.621	144.919	Hi5	fp	0	0
1717	191797	4253.58	10249.6	9032.51	475.74	74.006	139.127	Hi5	ANcr1	0	0
1718	191797	4124.9	10301.1	9025.88	475.925	71.012	139.983	Hi5	ANcr1	0	0
1719	191797	4067.97	10206	8992.03	474.151	69.628	138.339	Hi5	ANcr1	0	0
1720	191797	3995.02	10232.4	8993.45	474.546	67.952	138.749	Hi5	SIM	0	0
1721	191797	4005.05	10309.1	9031.07	476.697	68.287	140.002	Hi5	SIM	0	0
1722	191797	4080.41	10326	9047.98	477.37	70.065	140.309	Hi5	ANcr1	0	0
1723	191797	3945.55	10205.7	8978.15	473.853	66.771	138.285	Hi5	SIM	0	0
1724	191797	4152.44	10332	9051.15	477.272	71.72	140.467	Hi5	ANcr1	0	0
1725	191797	4296.88	10299.4	5160.53	252.092	46.339	147.083	Hi5	SSp-ll4	0	0
1726	191797	4085.26	10290.2	8513.11	447.049	67.586	141.862	Hi5	SIM	0	0
1727	191797	4081.32	10337.7	8514.25	447.16	67.531	142.714	Hi5	SIM	0	0
1728	191797	4145.75	10369.1	8509.36	446.638	68.97	143.325	Hi5	arb	0	0
1729	191797	4084.52	10405.7	8525.15	447.815	67.704	143.896	Hi5	SIM	0	0
1730	191797	4236.97	10224.4	8492.68	445.251	70.831	140.834	Hi5	SIM	0	0
1731	191797	4638.29	10486.8	8751.84	458.583	81.385	144.925	Hi5	SIM	0	0
1732	191797	4569.63	10390.8	8597.2	450.06	79	143.715	Hi5	SIM	0	0
1733	191797	4678.22	10396.8	8707.69	455.864	82.044	143.506	Hi5	arb	0	0
1734	191797	4662.92	10314.9	8650.74	452.658	81.369	142.226	Hi5	arb	0	0
1735	191797	4665.04	10296.1	8603.89	450.012	81.133	142.067	Hi5	arb	0	0
1736	191797	4626.76	10323.3	8578.1	448.727	80.135	142.623	Hi5	SIM	0	0
1737	191797	4729.98	10310.1	9836.38	520.124	88.076	136.892	Hi5	unknow	0	0
1738	191797	4831.43	10436.7	8823.75	461.806	86.08	143.91	Hi5	SIM	0	0
1739	191797	4954.63	10362.5	8813.59	460.675	88.794	142.719	Hi5	SIM	0	0
1740	191797	4935.93	10417.8	8867.57	463.833	88.653	143.468	Hi5	SIM	0	0
1741	191797	4879.9	10404	8813.41	461.002	87.118	143.404	Hi5	SIM	0	0
1742	191797	4774.97	10216.5	9384.06	493.945	87.326	137.206	Hi5	ANcr1	0	0
1743	191797	4702.87	10183.7	9378.77	493.855	85.672	136.616	Hi5	ANcr1	0	0
1744	191797	4721.02	10158.6	9375.94	493.601	86.103	136.168	Hi5	ANcr1	0	0
1745	191797	4757.32	10103.1	9361.18	492.56	86.938	135.218	Hi5	ANcr1	0	0
1746	191797	4654.22	10231.4	10003.7	529.534	87.177	134.779	Hi5	unknow	0	0
1747	191797	4663.65	10135.9	9998.96	529.156	87.447	133.012	Hi5	unknow	0	0
1748	191797	4757.59	10129.2	10024	530.274	89.748	132.755	Hi5	unknow	0	0
1749	191797	4718.08	10202.4	8544.24	446.428	81.9	140.658	Hi5	arb	0	0
1750	191797	4687.89	10238.4	8550.41	446.901	81.286	141.255	Hi5	SIM	0	0
1751	191797	4732.37	10214	8627.58	451.024	82.749	140.551	Hi5	SIM	0	0
1752	191797	4774.01	10198.3	8647.67	451.978	83.795	140.228	Hi5	SIM	0	0
1753	191797	4704.79	10240.4	8569.02	447.88	81.781	141.233	Hi5	SIM	0	0
1754	191797	4593.44	10279.1	8515.9	445.331	78.986	142.038	Hi5	SIM	0	0
1755	191797	4593.2	10197	8480.98	443.339	78.704	140.702	Hi5	SIM	0	0
1756	191797	4667.24	10183	8492.56	443.723	80.42	140.47	Hi5	SIM	0	0
1757	191797	4789.41	10141.1	8509.72	444.228	83.222	139.755	Hi5	SIM	0	0
1758	191797	4768.6	10155.7	8566.03	447.427	83.141	139.769	Hi5	arb	0	0
1759	191797	4748.71	10207.2	5087.29	249.002	54.782	146.443	Hi5	SSp-ll5	0	0
1760	191797	7039.86	10257	8983.7	462.376	135.275	140.175	Hi5	arb	0	0
1761	191797	7052.29	10184.7	8966.4	461.293	135.463	138.937	Hi5	arb	0	0
1762	191797	7103.31	10236.7	8963.59	460.983	136.47	139.897	Hi5	arb	0	0
1763	191797	7160.4	10293.2	8945.24	459.791	137.485	141.005	Hi5	arb	0	0
1764	191797	7130.2	10152.6	8946.53	459.849	136.967	138.441	Hi5	arb	0	0
1765	191797	4773.74	10217.5	9090.86	476.987	86.137	138.642	Hi5	ANcr1	0	0
1766	191797	4826.85	10151	9071.11	475.592	87.298	137.545	Hi5	ANcr1	0	0
1767	191797	4728.15	10096.7	9028.57	473.503	84.881	136.698	Hi5	ANcr1	0	0
1768	191797	4813.17	10096.3	9044.83	474.097	86.892	136.663	Hi5	ANcr1	0	0
1769	191797	4870.26	10093.8	9051.49	474.254	88.223	136.616	Hi5	ANcr1	0	0
1770	191797	4605.03	10422.1	9142.69	480.799	82.355	142.051	Hi5	ANcr1	0	0
1771	191797	4819.33	10118.3	8504.61	443.828	83.837	139.39	Hi5	SIM	0	0
1772	191797	4852.26	10090	8495.79	443.21	84.489	138.943	Hi5	arb	0	0
1773	191797	4774.58	10109.1	8600.23	449.272	83.478	138.79	Hi5	SIM	0	0
1774	191797	4746.53	10268.1	8663.75	453.033	83.298	141.407	Hi5	SIM	0	0
1775	191797	4612.7	10305.3	8547.88	447.071	79.629	142.401	Hi5	SIM	0	0
1776	191797	4706.21	10241.1	8631.54	451.363	82.199	141.004	Hi5	arb	0	0
1777	191797	4761.86	10170.2	8632.33	451.147	83.421	139.765	Hi5	SIM	0	0
1778	191797	4836.61	10140.5	8656.82	452.209	85.228	139.197	Hi5	SIM	0	0
1779	191797	4806.42	10132.3	8530.99	445.337	83.737	139.522	Hi5	arb	0	0
1780	191797	15534.9	10444.8	3812.52	174.117	276.329	144.479	Hi5	OT	0	0
1781	191797	15550.4	10472.2	3761.82	171.166	276.598	144.794	Hi5	OT	0	0
1782	191797	12015.2	10246.9	3168.6	147.052	199.95	143.698	Hi5	OLF	0	0
1783	191797	12097.9	10148.4	3117.94	143.182	201.484	141.315	Hi5	PIR	0	0
1784	191797	12078.9	10241.1	3148.09	145.49	201.207	143.248	Hi5	OLF	0	0
1785	191797	7496.25	10240.5	7423.46	377.015	132.088	145.854	Hi5	MB	0	0
1786	191797	12017.6	10286.7	10159.1	514.357	249.294	127.21	Hi5	unknow	1	0
1787	191797	12129.9	10322.2	3385.56	161.293	202.423	146.949	Hi5	CP	0	0
1788	191797	11968.3	10284.9	4189.04	210.092	201.647	153.076	Hi5	CP	0	0
1789	191797	11981.8	10304.9	10392.4	527.312	250.684	126.556	Hi5	unknow	1	0
1790	191797	8106.99	10123.8	10164.6	525.994	165.674	129.587	Hi5	unknow	0	0
1791	191797	8179.37	10112.3	10200.6	527.73	167.444	129.049	Hi5	unknow	0	0
1792	191797	8247.93	10143.9	10302.6	533.069	169.511	128.966	Hi5	unknow	0	0
1793	191797	8179.14	10114.6	8333.33	423.943	153.773	139.491	Hi5	arb	0	0
1794	191797	8286.85	10230.3	8347.04	424.473	155.94	141.482	Hi5	CUL4, 5	0	0
1795	191797	8283.54	10167.7	8335.57	423.85	155.84	140.4	Hi5	arb	0	0
1796	191797	8406.8	10139.6	8320.28	422.77	158.213	139.906	Hi5	CUL4, 5	0	0
1797	191797	8247.05	10340.7	4442.89	228.728	126.238	159.761	Hi5	CP	0	0
1798	191797	8275.66	10321.9	4440.58	228.684	126.844	159.513	Hi5	CP	0	0
1799	191797	8193.59	10282.6	4428.82	227.824	125.264	158.688	Hi5	CP	0	0
1800	191797	8287.04	10377.5	4424.22	228.022	127.123	160.455	Hi5	CP	0	0
1801	191797	8309.78	10405.9	4430.1	228.412	127.537	160.965	Hi5	CP	0	0
1802	191797	12901.2	10223.6	3311.81	153.815	217.728	143.058	Hi5	EPd	0	0
1803	191797	12793.6	10413.1	3192.73	146.942	215.873	145.441	Hi5	PIR	0	0
1804	191797	12732.8	10378.7	2799.32	121.511	215.207	141.21	Hi5	OLF	0	0
1805	191797	5185.65	10377.2	10145.5	535.881	100.052	136.743	Hi5	unknow	0	0
1806	191797	5318.18	10396.7	10181.7	537.436	103.274	136.906	Hi5	unknow	0	0
1807	191797	5280.92	10225.8	9171.49	479.718	98.084	138.534	Hi5	ANcr1	0	0
1808	191797	5395.5	10159.3	9249.36	483.779	101.091	136.889	Hi5	ANcr1	0	0
1809	191797	5103.09	10300.1	9361.42	491.538	94.753	138.884	Hi5	ANcr1	0	0
1810	191797	5007.14	10355.2	9384.1	493.265	92.576	139.782	Hi5	ANcr1	0	0
1811	191797	5185.83	10358.3	9315.7	488.613	96.433	140.195	Hi5	ANcr1	0	0
1812	191797	5234.07	10338.8	9297.76	487.366	97.484	139.933	Hi5	ANcr1	0	0
1813	191797	12308.8	10219	4349.61	217.058	209.151	151.124	Hi5	CP	0	0
1814	191797	12358.8	10141.5	4358.62	217.141	210.064	149.699	Hi5	CP	0	0
1815	191797	12199.5	10224.8	10223.2	517.627	253.976	125.547	Hi5	unknow	0	0
1816	191797	12214.9	10410.5	3158.63	146.26	204.12	145.968	Hi5	OLF	0	0
1817	191797	12261.8	10296.3	3155.78	145.659	204.912	143.912	Hi5	PIR	0	0
1818	191797	12253.6	10407	3156.36	145.996	204.891	145.814	Hi5	OLF	0	0
1819	191797	12171.5	10257.2	3548.45	171.487	203.483	147.385	Hi5	CP	0	0
1820	191797	4523.05	10385.2	9422.97	497.242	81.49	140.09	Hi5	ANcr1	0	0
1821	191797	4446.6	10431.8	7406.21	384.336	67.96	147.79	Hi5	RSPd6a	0	0
1822	191797	4386.43	10405.2	7404.76	384.469	66.609	147.287	Hi5	RSPd6a	0	0
1823	191797	4381.35	10424	7350.9	381.496	66.05	147.617	Hi5	RSPd6a	0	0
1824	191797	4364.96	10265.2	6413.23	326.224	58.053	146.49	Hi5	fp	0	0
1825	191797	4409.99	10185.7	6466.73	329.426	59.417	145.117	Hi5	fp	0	0
1826	191797	4367.15	10154.5	6377.38	324.029	57.714	144.687	Hi5	fp	0	0
1827	191797	4516.72	10290.8	9086.87	477.827	80.206	139.849	Hi5	ANcr1	0	0
1828	191797	4467.31	10193.1	9037.08	475.1	78.932	138.245	Hi5	ANcr1	0	0
1829	191797	4425.02	10290	9074.43	477.478	78.063	139.824	Hi5	ANcr1	0	0
1830	191797	4453.68	10214.4	7418.54	385.077	68.076	144.078	Hi5	RSPd6a	0	0
1831	191797	4530.88	10182.9	7441.18	386.076	69.926	143.6	Hi5	RSPd6a	0	0
1832	191797	4474.89	10137.2	7365.77	382.129	68.079	142.8	Hi5	RSPd6a	0	0
1833	191797	4573.23	10304.2	7475.54	387.762	71.21	145.7	Hi5	RSPd5	0	0
1834	191797	4521.05	10199	9952.98	527.067	83.876	134.412	Hi5	unknow	0	0
1835	191797	4496.91	10253.3	9946.27	526.815	83.242	135.453	Hi5	unknow	0	0
1836	191797	4583.65	10364	9854.7	521.612	84.722	137.85	Hi5	unknow	0	0
1837	191797	4579.35	10285	9850.11	521.287	84.668	136.403	Hi5	unknow	0	0
1838	191797	4594.1	10186.7	9838.07	520.471	85.036	134.62	Hi5	unknow	0	0
1839	191797	4551.92	10212.4	9849.7	521.265	84.092	135.061	Hi5	unknow	0	0
1840	191797	4503.8	10322.6	9865.12	522.369	82.958	137.056	Hi5	unknow	0	0
1841	191797	4460.23	10197.5	9904.85	524.566	82.242	134.584	Hi5	unknow	0	0
1842	191797	4485.61	10143.8	9868.22	522.407	82.701	133.724	Hi5	unknow	0	0
1843	191797	4454.97	10272.3	9911.59	525.029	82.091	135.95	Hi5	unknow	0	0
1844	191797	4470.34	10303.5	9882.42	523.401	82.282	136.639	Hi5	unknow	0	0
1845	191797	4460.73	10187.2	9913.89	525.055	82.305	134.358	Hi5	unknow	0	0
1846	191797	4418	10297.5	8502.8	445.198	74.996	142.247	Hi5	SIM	0	0
1847	191797	4367.67	10302	8497.93	445.096	73.841	142.298	Hi5	arb	0	0
1848	191797	4361.78	10207.2	8488.25	444.533	73.589	140.632	Hi5	arb	0	0
1849	191797	9701.05	10409.7	8519.86	430.248	184.732	143.322	Hi5	icp	0	0
1850	191797	9650.85	10368.3	3175.7	153.278	153.89	149.464	Hi5	fa	0	0
1851	191797	9584.97	10270.2	3074.5	146.039	152.067	146.41	Hi5	AId6a	0	0
1852	191797	6162.15	10312.7	9073.45	470.911	117.145	140.751	Hi5	arb	0	0
1853	191797	6023.09	10127.4	8977	465.782	113.582	137.876	Hi5	arb	0	0
1854	191797	6060.48	10231.5	9018.31	468.078	114.625	139.563	Hi5	arb	0	0
1855	191797	6074.93	10176.4	9003.12	467.115	114.865	138.633	Hi5	arb	0	0
1856	191797	6070.03	10301.3	9047.02	469.738	114.982	140.687	Hi5	arb	0	0
1857	191797	5949.99	10143.6	8966.49	465.465	111.906	138.237	Hi5	arb	0	0
1858	191797	6277.37	10255.4	9055.69	469.414	119.565	139.792	Hi5	arb	0	0
1859	191797	6212.68	10118.5	8391.87	432.839	113.591	140.45	Hi5	SIM	0	0
1860	191797	6263.85	10141.8	8435.74	435.068	115.024	140.66	Hi5	CUL4, 5	0	0
1861	191797	6081.14	10108.8	8401.21	433.783	110.804	140.248	Hi5	SIM	0	0
1862	191797	6159.38	10433.5	7907.65	406.659	108.733	148.13	Hi5	ICe	0	0
1863	191797	13842.8	10462.8	3371.56	154.879	237.957	146.551	Hi5	PIR	0	0
1864	191797	13804.4	10373.5	3454.42	159.874	236.961	145.535	Hi5	PIR	0	0
1865	191797	13744.5	10358.7	3367.05	154.785	235.653	144.848	Hi5	PIR	0	0
1866	191797	13642.9	10469.6	3350.81	154.33	233.688	146.759	Hi5	PIR	0	0
1867	191797	13664.5	10199.1	3415.01	157.683	233.648	142.495	Hi5	PIR	0	0
1868	191797	13599.3	10108.7	3386.21	155.976	232.114	140.832	Hi5	PIR	0	0
1869	191797	13744.1	10103.1	3403.75	156.545	235.191	140.674	Hi5	PIR	0	0
1870	191797	13599.5	10112.2	3333.77	152.783	232.149	140.533	Hi5	PIR	0	0
1871	191797	13804.2	10349.9	3639.28	170.835	237.116	145.938	Hi5	ACB	0	0
1872	191797	13750.5	10365.1	3727.21	176.254	236.21	146.567	Hi5	ACB	0	0
1873	191797	13821	10315.5	4231.13	204.298	240.416	146.707	Hi5	FS	0	0
1874	191797	13853.3	10240.2	5495.76	269.772	250.506	147.438	Hi5	MEA	1	0
1875	191797	14652.9	10123.7	3613.83	165.509	255.288	140.672	Hi5	OT	0	0
1876	191797	14450.5	10242.5	3576.48	164.346	250.924	142.915	Hi5	PIR	0	0
1877	191797	14426.8	10417.2	3513.77	161.05	250.645	145.647	Hi5	OLF	0	0
1878	191797	14532.1	10388.7	3548.43	162.608	252.961	145.109	Hi5	SI	0	0
1879	191797	14561	10274.3	4806.3	231.668	260.699	145.432	Hi5	AAA	1	0
1880	191797	14480.2	10252.6	3900.17	182.866	252.444	143.527	Hi5	ACB	0	0
1881	191797	14358.5	10148.7	3784.08	176.553	249.14	141.957	Hi5	OLF	0	0
1882	191797	5180.09	10227.1	9538.88	501.584	97.3	136.631	Hi5	ANcr2	0	0
1883	191797	5205.9	10335.1	9545.65	501.997	97.833	138.602	Hi5	ANcr2	0	0
1884	191797	6095.48	10356.6	9087.66	472.01	115.755	141.479	Hi5	ANcr1	0	0
1885	191797	6110.64	10517.3	8801.77	456.084	114.291	145.892	Hi5	SIM	0	0
1886	191797	6145.39	10567.9	8811.43	456.557	115.101	146.759	Hi5	SIM	0	0
1887	191797	14569.7	10397.9	3947.58	185.384	254.949	145.789	Hi5	ACB	0	0
1888	191797	14583.3	10475.5	3953.13	185.738	255.449	147.05	Hi5	ACB	0	0
1889	191797	14567.5	10230	5794.97	283.852	270.42	144.917	Hi5	MEA	0	0
1890	191797	14587.1	10280.7	5804.9	284.353	271.169	145.65	Hi5	MEA	0	0
1891	191797	14619.2	10227.4	5693.92	278.285	270.443	144.852	Hi5	MEA	0	0
1892	191797	14660.1	10229.4	5719.63	279.591	271.707	144.746	Hi5	MEA	0	0
1893	191797	14685.9	10364.1	5737.6	280.517	272.982	146.785	Hi5	MEA	0	0
1894	191797	11305.1	10365.8	3377.97	163.726	186.595	149.989	Hi5	CP	0	0
1895	191797	11270.8	10388.9	3451.12	168.802	186.131	151.366	Hi5	CP	0	0
1896	191797	11484	10345.2	3074.49	142.369	189.672	145.359	Hi5	AIv2/3	0	0
1897	191797	11303.8	10369.1	3137.16	147.266	186.223	146.949	Hi5	AIv5	0	0
1898	191797	11383.3	10288.8	8531.76	428.938	219.722	138.997	Hi5	sptV	1	0
1899	191797	13204.1	10315.6	4197.33	205.215	227.215	148.724	Hi5	CP	0	0
1900	191797	13247.5	10261	4311.3	211.063	228.797	148.021	Hi5	STR	0	0
1901	191797	13297.8	10436.9	4149.6	202.402	229.15	150.188	Hi5	CP	0	0
1902	191797	13165.2	10463.8	3282.42	151.665	223.621	146.646	Hi5	PIR	0	0
1903	191797	13072.4	10272	3185.51	145.414	221.442	142.655	Hi5	PIR	0	0
1904	191797	9208.87	10252.8	3958.25	204.745	147.075	157.626	Hi5	CP	0	0
1905	191797	9263.29	10140.7	3937	203.083	148.14	155.478	Hi5	CP	0	0
1906	191797	9146.96	10350.6	3935.19	203.684	145.888	159.118	Hi5	CP	0	0
1907	191797	9310.87	10406.7	4363.56	227.697	148.073	162.128	Hi5	CP	0	0
1908	191797	9318.36	10309.9	4416.17	230.034	148.079	160.456	Hi5	CP	0	0
1909	191797	9316.41	10306.1	10034.8	514.427	190.273	131.756	Hi5	unknow	0	0
1910	191797	9273.17	10313.5	10130	519.899	190.105	131.299	Hi5	unknow	0	0
1911	191797	9354.85	10240.2	10008	512.87	190.897	130.674	Hi5	unknow	0	0
1912	191797	8785.78	10182.9	8382.83	425.111	166.109	140.318	Hi5	arb	0	0
1913	191797	8820.33	10143.4	8334.21	422.568	166.494	139.757	Hi5	CUL4, 5	0	0
1914	191797	8871.14	10075	8491.87	430.371	168.604	137.974	Hi5	arb	0	0
1915	191797	8741.38	10188.2	8413.22	426.748	165.435	140.335	Hi5	arb	0	0
1916	191797	8765.73	10196	8401.94	426.127	165.833	140.501	Hi5	arb	0	0
1917	191797	8692.56	10240.2	8404.99	426.473	164.379	141.316	Hi5	arb	0	0
1918	191797	8693.02	10198.3	8340.06	423.165	163.982	140.775	Hi5	CUL4, 5	0	0
1919	191797	8659.79	10186.8	8329.81	422.713	163.265	140.617	Hi5	CUL4, 5	0	0
1920	191797	8646.07	10240.7	8353.97	423.996	163.116	141.51	Hi5	CENT3	0	0
1921	191797	8795.27	10146.8	8458.6	428.896	166.835	139.417	Hi5	arb	0	0
1922	191797	8786.98	10129.4	8490.8	430.535	166.908	139.004	Hi5	arb	0	0
1923	191797	8719.86	10167.1	8497.54	431.054	165.61	139.696	Hi5	arb	0	0
1924	191797	8820.52	10129.2	8449.83	428.387	167.283	139.118	Hi5	arb	0	0
1925	191797	8755.98	10170.7	8446.3	428.377	165.961	139.908	Hi5	arb	0	0
1926	191797	8789.06	10073.9	8286.64	420.213	165.613	138.69	Hi5	CUL4, 5	0	0
1927	191797	8694.51	10236.4	8366.28	424.508	164.159	141.37	Hi5	CENT3	0	0
1928	191797	8727.71	10211.7	8402.96	426.273	165.079	140.796	Hi5	arb	0	0
1929	191797	8652.25	10375.6	6900.19	346.933	149.53	151.832	Hi5	POL	1	0
1930	191797	8782.31	10265.2	9875.87	507.052	177.797	133.321	Hi5	PRM	0	0
1931	191797	8795.3	10149.6	9826.1	504.237	177.751	131.579	Hi5	PRM	0	0
1932	191797	8761.28	10143.3	9812.5	503.568	176.941	131.633	Hi5	PRM	0	0
1933	191797	8584.07	10185.5	8327.34	422.756	161.75	140.635	Hi5	CUL4, 5	0	0
1934	191797	8615.35	10266.7	8468.97	429.917	163.276	141.631	Hi5	arb	0	0
1935	191797	8613.53	10262.2	8503.33	431.666	163.484	141.446	Hi5	arb	0	0
1936	191797	8573.32	10294.4	8563.66	434.871	163.095	141.865	Hi5	arb	0	0
1937	191797	8549.39	10341.4	8573.51	435.474	162.655	142.696	Hi5	arb	0	0
1938	191797	8719.15	10218.7	8371.1	424.686	164.691	141.027	Hi5	CENT3	0	0
1939	191797	8592.04	10279.9	8525.91	432.883	163.206	141.706	Hi5	arb	0	0
1940	191797	8766.5	10439.4	10102.3	519.912	179.116	134.692	Hi5	unknow	0	0
1941	191797	8810.96	10443.7	10254.2	528.181	181.127	133.765	Hi5	unknow	0	0
1942	191797	8884.71	10436.9	10305.6	530.742	183.048	133.254	Hi5	unknow	0	0
1943	191797	8874.66	10396.1	10266.8	528.696	182.589	132.716	Hi5	unknow	0	0
1944	191797	8905.27	10399.9	10287.9	529.747	183.384	132.627	Hi5	unknow	0	0
1945	191797	8745.99	10162.3	3150.03	151.147	134.959	145.62	Hi5	MOp6a	0	0
1946	191797	8763.09	10227.4	3062.83	145.353	134.832	145.711	Hi5	MOs6a	0	0
1947	191797	8831.92	10232.1	3045.87	144.222	136.205	145.583	Hi5	MOs6a	0	0
1948	191797	8852.33	10350.2	4364.24	226.718	138.829	160.899	Hi5	CP	0	0
1949	191797	8802.54	10295.9	4401.05	228.272	137.697	159.941	Hi5	CP	0	0
1950	191797	8897.94	10219.6	4307.93	223.662	140.01	158.691	Hi5	CP	0	0
1951	191797	8848.7	10269	4408.88	228.708	138.605	159.541	Hi5	CP	0	0
1952	191797	8797.09	10196.9	4463.99	231.082	137.367	158.252	Hi5	CP	0	0
1953	191797	8898.99	10331.6	4397.38	228.411	139.644	160.633	Hi5	CP	0	0
1954	191797	8719.53	10170.2	4427.01	229.06	135.971	157.745	Hi5	CP	0	0
1955	191797	8740.17	10428.3	4238.42	220.279	137.056	161.883	Hi5	CP	0	0
1956	191797	8959.7	10320.8	4399.28	228.618	140.865	160.506	Hi5	CP	0	0
1957	191797	5351.83	10230.8	10183.5	537.323	104.179	133.768	Hi5	unknow	0	0
1958	191797	5553.84	10274.3	6270.84	316.265	78.639	149.225	Hi5	CA1	1	1
1959	191797	5425.68	10352.3	8072.88	418.27	94.283	145.966	Hi5	MB	0	0
1960	191797	5262.4	10253.3	8875.25	462.824	96.026	140.689	Hi5	SIM	0	0
1961	191797	5211.24	10214.5	8794.84	458.484	94.402	140.323	Hi5	SIM	0	0
1962	191797	5329.45	10259.1	8901.23	464.054	97.683	140.682	Hi5	SIM	0	0
1963	191797	5413.68	10312.2	8957.98	467.028	99.905	141.349	Hi5	SIM	0	0
1964	191797	5418.6	10363	8978.55	468.23	100.125	142.154	Hi5	SIM	0	0
1965	191797	5217.95	10298.6	8889.48	463.842	95.114	141.41	Hi5	SIM	0	0
1966	191797	5243.39	10296.3	8896	464.112	95.721	141.348	Hi5	SIM	0	0
1967	191797	5292.41	10347.2	8950.1	467.055	97.128	141.994	Hi5	SIM	0	0
1968	191797	5547.38	10230	9497.71	497.873	105.603	136.839	Hi5	ANcr2	0	0
1969	191797	8446.78	10267.4	3198.66	154.442	129.018	147.937	Hi5	MOp6a	0	0
1970	191797	8513.27	10319.9	3402.3	168.288	131.856	151.325	Hi5	CP	0	0
1971	191797	13462	10264.7	3468.35	161.771	229.481	144.209	Hi5	OLF	0	0
1972	191797	13348.6	10369.5	3524.81	165.847	227.352	146.498	Hi5	CP	0	0
1973	191797	13407.4	10355.7	3588.79	169.46	228.646	146.526	Hi5	CP	0	0
1974	191797	13543.8	10356.7	3053.34	136	231.754	142.557	Hi5	PIR	0	0
1975	191797	13433	10234	3378.99	156.34	228.805	143.133	Hi5	PIR	0	0
1976	191797	13449.2	10290.4	3297.59	151.376	229.283	143.502	Hi5	PIR	0	0
1977	191797	13466.5	10345.6	3298.58	151.486	229.743	144.442	Hi5	PIR	0	0
1978	191797	13443.8	10352.1	3315.33	152.608	229.264	144.699	Hi5	PIR	0	0
1979	191797	13396.8	10397.6	3264.81	149.705	228.386	145.147	Hi5	PIR	0	0
1980	191797	13364	10259.3	3273.78	150.1	227.448	142.868	Hi5	PIR	0	0
1981	191797	13329	10266.3	3265.45	149.7	226.731	142.959	Hi5	PIR	0	0
1982	191797	13372.6	10274.6	3274.61	150.155	227.656	143.13	Hi5	PIR	0	0
1983	191797	13377.8	10296	3282.19	150.653	227.796	143.551	Hi5	PIR	0	0
1984	191797	13381.3	10318.8	3291.49	151.265	227.902	144.011	Hi5	PIR	0	0
1985	191797	13343.6	10366.3	3258.41	149.412	227.214	144.61	Hi5	PIR	0	0
1986	191797	13422.2	10214.5	3562.14	167.503	228.631	143.972	Hi5	CP	0	0
1987	191797	13381.3	10169.8	3439.69	160.108	227.605	142.511	Hi5	OLF	0	0
1988	191797	6768.93	10309	7780.86	397.954	120.407	146.183	Hi5	ICe	0	0
1989	191797	6734	10253	7653.43	391.041	118.419	145.688	Hi5	ICe	0	0
1990	191797	6711.41	10223.3	10358	541.794	136.051	132.029	Hi5	unknow	0	0
1991	191797	8903.02	10403.2	3935.91	203.645	141.079	159.853	Hi5	CP	0	0
1992	191797	8866.57	10405.4	3351.88	165.498	138.892	152.36	Hi5	CP	0	0
1993	191797	8899.77	10400.9	3015.7	142.456	137.682	148.036	Hi5	MOs6a	0	0
1994	191797	9429	10174.1	3045.72	143.956	148.647	144.451	Hi5	AId6a	0	0
1995	191797	9446.6	10127.3	3086.21	146.648	149.143	144.175	Hi5	AId6a	0	0
1996	191797	9501.18	10238.4	3144.04	150.871	150.635	146.821	Hi5	AId6a	0	0
1997	191797	9511.71	10386.5	3535.73	178.265	152.477	155.043	Hi5	CP	0	0
1998	191797	9437.25	10353.8	3551.32	179.221	151.055	154.682	Hi5	CP	0	0
1999	191797	9467.2	10240.8	4042.85	209.713	152.05	158.083	Hi5	CP	0	0
[truncated: 198,000+ more rows]
