# Supplementary material for: Full-Spectrum Neuronal Diversity and Stereotypy through Whole Brain Morphometry
Source: Research Square preprint supplement (doi:10.21203/rs.3.rs-3146034/v1), 2023-07-25
Supplement: Supplementary file 3 [file 8b4b322acbcace3e7f169b12.xlsx]

## Sheet: soma_region314_counts
region	count
AAA	116
ACAd	478
ACAv	447
ACB	4021
AD	1
ADP	2
AHN	69
AId	1880
AIp	1143
AIv	1214
AMB	16
AM	42
AN	7513
AOB	194
AON	4872
AP	25
APN	53
APr	76
ARH	68
AT	2
AUDd	401
AUDp	771
AUDpo	178
AUDv	539
AV	12
AVP	1
AVPV	22
Acs5	1
B	2
BA	2
BLA	625
BMA	452
BST	266
CA1	2717
CA2	40
CA3	542
CEA	654
CENT	3707
CL	10
CLA	708
CLI	12
CM	41
COAa	296
COAp	652
COPY	793
CP	24580
CS	70
CU	136
CUL	7369
CUN	15
DCO	340
DEC	3657
DG	2510
DMH	64
DMX	29
DN	14
DP	57
DR	50
DT	9
DTN	7
ECT	498
ECU	18
ENTl	664
ENTm	793
EPd	2101
EPv	832
EW	1
ZI	133
FL	805
FN	56
FOTU	848
FRP	69
FS	628
GPe	152
GPi	18
GR	71
GRN	248
GU	998
HATA	72
I5	2
IA	190
IAD	11
IAM	3
ICB	2
IC	7806
IF	24
IG	19
IGL	43
III	2
ILA	47
IMD	19
PAG	663
IO	62
IP	48
IPN	33
IRN	299
ISN	4
IntG	5
PB	232
LA	365
LAV	20
LC	1
LD	33
LDT	16
LGd	432
LGv	41
LH	31
LHA	114
LIN	9
LING	24
LM	2
LP	108
LPO	16
LRN	72
LSc	404
LSr	627
LSv	57
LT	2
MA	70
MA3	2
MARN	56
MD	103
MDRNd	106
MDRNv	80
ME	3
MEA	606
MEPO	2
MG	124
MH	19
MM	24
MOB	20468
MOp	2528
MOs	1974
MPN	63
MPO	38
MPT	3
MRN	529
MS	55
MT	2
MV	327
NB	34
NDB	102
NI	4
NLL	60
NLOT	41
NOD	440
NOT	10
NPC	27
NR	10
NTB	15
NTS	305
OP	6
ORBl	624
ORBm	105
ORBvl	165
OT	4938
P5	16
PA	359
PAA	243
PAR	230
PARN	399
PAS	13
PBG	6
PC5	2
PCG	28
PCN	10
PERI	158
PF	20
PFL	2327
PG	326
PGRNd	49
PGRNl	77
PH	59
PIL	21
PIR	4466
PL	191
PMd	9
PMv	56
PN	3
PO	102
POL	18
SOC	125
POST	404
PP	12
PPN	32
PPT	7
PPY	21
PR	12
PRE	404
PRM	4029
PRNc	57
PRNr	116
PRP	43
PS	11
PSTN	42
PSV	168
PT	48
PVH	23
PVHd	20
PVT	53
PVa	13
PVi	4
PVp	18
PVpo	7
PYR	1549
Pa5	23
PeF	7
PoT	28
ProS	322
RCH	5
RE	58
RH	15
RL	6
RM	19
RN	27
RO	9
RPA	11
RPO	6
RR	18
RSPagl	594
RSPd	960
RSPv	1020
RT	169
SBPV	34
SCH	57
SCm	1739
SCs	839
SF	136
SGN	5
SH	10
SI	1518
SIM	4985
SLD	1
SMT	34
SNc	42
SNr	128
SO	2
SPA	10
SPFm	10
SPFp	6
SPIV	101
SPVC	559
SPVI	432
SPVO	108
SSp-bfd	1814
SSp-ll	634
SSp-m	1967
SSp-n	880
SSp-tr	333
SSp-ul	1007
SSp-un	355
SSs	3458
STN	8
SUB	501
SUM	9
SUT	25
SUV	16
TEa	874
TMv	67
TR	267
TRN	142
TRS	72
TT	473
TU	66
UVU	1428
V	3
VAL	45
VCO	206
VI	1
VII	100
VISC	1121
VISa	320
VISal	197
VISam	170
VISl	287
VISli	123
VISp	2070
VISpl	243
VISpm	280
VISpor	462
VISrl	243
VLPO	4
VM	183
VMH	26
VMPO	4
VPL	387
VPLpc	12
VPM	901
VPMpc	14
VTA	127
VeCB	8
XII	21
Xi	22
x	4
y	2
